# Supplementary material for: Peer review of the pesticide risk assessment of the active substance phosmet
Source: PubMed Central journal article supplement (PMC7968347; doi:10.2903/j.efsa.2021.6237), 2021-03-17
Supplement: EFS2-19-e06237-s001.pdf [file EFS2-19-e06237-s001.pdf]

Appendix to:

EFSA (European Food Safety Authority), 2021. Conclusion on the peer review of the pesticide risk assessment of the active substance phosmet. EFSA Journal 2021;19(3):6237, 134 pp. doi:10.2903/j.efsa.2021.6237

© European Food Safety Authority, 2021

## Appendix A – List of end points for the active substance and the representative formulation

### Identity, Physical and Chemical Properties, Details of Uses, Further Information (Regulation (EU) N° 283/2013, Annex Part A, points 1.3 and 3.2)

|                                    |             |
|------------------------------------|-------------|
| Active substance (ISO Common Name) | Phosmet     |
| Function ( <i>e.g.</i> fungicide)  | Insecticide |
| Rapporteur Member State            | Spain       |
| Co-rapporteur Member State         | Greece      |

### Identity (Regulation (EU) N° 283/2013, Annex Part A, point 1)

|                                                                                                                                           |                                                                                                                                                |
|-------------------------------------------------------------------------------------------------------------------------------------------|------------------------------------------------------------------------------------------------------------------------------------------------|
| Chemical name (IUPAC)                                                                                                                     | <i>O,O</i> -dimethyl <i>S</i> -phthalimidomethyl phosphorodithioate<br>or<br><i>N</i> -<br>{[(dimethoxyphosphinothioyl)thio]methyl}phthalimide |
| Chemical name (CA)                                                                                                                        | <i>S</i> -[(1,3-dihydro-1,3-dioxo-2 <i>H</i> -isoindol-2-yl)methyl] <i>O,O</i> -dimethyl phosphorodithioate                                    |
| CIPAC No                                                                                                                                  | 318                                                                                                                                            |
| CAS No                                                                                                                                    | 732-11-6                                                                                                                                       |
| EC No (EINECS or ELINCS)                                                                                                                  | 211-987-4                                                                                                                                      |
| FAO Specification (including year of publication)                                                                                         | Not available (evaluation report FAO/WHO 318/2019)                                                                                             |
| Minimum purity of the active substance as manufactured                                                                                    | 950 g/kg                                                                                                                                       |
| Identity of relevant impurities (of toxicological, ecotoxicological and/or environmental concern) in the active substance as manufactured | Toluene: not more than 1 g/kg                                                                                                                  |
| Molecular formula                                                                                                                         | C <sub>11</sub> H <sub>12</sub> NO <sub>4</sub> PS <sub>2</sub>                                                                                |
| Molar mass                                                                                                                                | 317.33 g/mol                                                                                                                                   |

Structural formula

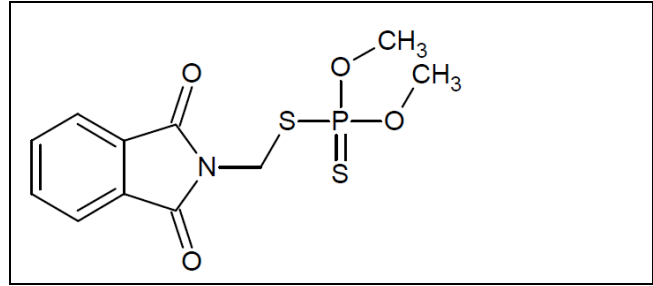

**Physical and chemical properties (Regulation (EU) N° 283/2013, Annex Part A, point 2)**

| Melting point (state purity)                                                            | 72°C (100%)                                                                                                                                                                                                                                                                                                                                                                                                                                                                                                    |                      |                                                    |                                                    |          |       |       |       |      |                 |       |       |       |      |                |       |       |
|-----------------------------------------------------------------------------------------|----------------------------------------------------------------------------------------------------------------------------------------------------------------------------------------------------------------------------------------------------------------------------------------------------------------------------------------------------------------------------------------------------------------------------------------------------------------------------------------------------------------|----------------------|----------------------------------------------------|----------------------------------------------------|----------|-------|-------|-------|------|-----------------|-------|-------|-------|------|----------------|-------|-------|
| Boiling point (state purity)                                                            | Decomposition of phosmet was observed before boiling at 208.5°C (100%).                                                                                                                                                                                                                                                                                                                                                                                                                                        |                      |                                                    |                                                    |          |       |       |       |      |                 |       |       |       |      |                |       |       |
| Temperature of decomposition (state purity)                                             | 208.5°C (100%)                                                                                                                                                                                                                                                                                                                                                                                                                                                                                                 |                      |                                                    |                                                    |          |       |       |       |      |                 |       |       |       |      |                |       |       |
| Appearance (state purity)                                                               | White, crystalline solid (99.7% and 97.0%)                                                                                                                                                                                                                                                                                                                                                                                                                                                                     |                      |                                                    |                                                    |          |       |       |       |      |                 |       |       |       |      |                |       |       |
| Spectra (UV/VIS, IR, NMR, MS), molar extinction at relevant wavelengths, optical purity | UV/VIS:                                                                                                                                                                                                                                                                                                                                                                                                                                                                                                        |                      |                                                    |                                                    |          |       |       |       |      |                 |       |       |       |      |                |       |       |
|                                                                                         | <table border="1"> <thead> <tr> <th>Solution:</th> <th><math>\lambda_{max}</math> (nm)</th> <th><math>\epsilon</math> (L mol<sup>-1</sup> cm<sup>-1</sup>)</th> </tr> </thead> <tbody> <tr> <td rowspan="2">Methanol</td> <td>221.9</td> <td>44668</td> </tr> <tr> <td>294.6</td> <td>1259</td> </tr> <tr> <td rowspan="2">Acidic methanol</td> <td>222.6</td> <td>42658</td> </tr> <tr> <td>295.6</td> <td>2399</td> </tr> <tr> <td>Basic methanol</td> <td>218.5</td> <td>16595</td> </tr> </tbody> </table> | Solution:            | $\lambda_{max}$ (nm)                               | $\epsilon$ (L mol <sup>-1</sup> cm <sup>-1</sup> ) | Methanol | 221.9 | 44668 | 294.6 | 1259 | Acidic methanol | 222.6 | 42658 | 295.6 | 2399 | Basic methanol | 218.5 | 16595 |
|                                                                                         | Solution:                                                                                                                                                                                                                                                                                                                                                                                                                                                                                                      | $\lambda_{max}$ (nm) | $\epsilon$ (L mol <sup>-1</sup> cm <sup>-1</sup> ) |                                                    |          |       |       |       |      |                 |       |       |       |      |                |       |       |
|                                                                                         | Methanol                                                                                                                                                                                                                                                                                                                                                                                                                                                                                                       | 221.9                | 44668                                              |                                                    |          |       |       |       |      |                 |       |       |       |      |                |       |       |
|                                                                                         |                                                                                                                                                                                                                                                                                                                                                                                                                                                                                                                | 294.6                | 1259                                               |                                                    |          |       |       |       |      |                 |       |       |       |      |                |       |       |
|                                                                                         | Acidic methanol                                                                                                                                                                                                                                                                                                                                                                                                                                                                                                | 222.6                | 42658                                              |                                                    |          |       |       |       |      |                 |       |       |       |      |                |       |       |
| 295.6                                                                                   |                                                                                                                                                                                                                                                                                                                                                                                                                                                                                                                | 2399                 |                                                    |                                                    |          |       |       |       |      |                 |       |       |       |      |                |       |       |
| Basic methanol                                                                          | 218.5                                                                                                                                                                                                                                                                                                                                                                                                                                                                                                          | 16595                |                                                    |                                                    |          |       |       |       |      |                 |       |       |       |      |                |       |       |
|                                                                                         | (97%)                                                                                                                                                                                                                                                                                                                                                                                                                                                                                                          |                      |                                                    |                                                    |          |       |       |       |      |                 |       |       |       |      |                |       |       |
| Vapour pressure (state temperature, state purity)                                       | $6.5 * 10^{-5}$ Pa at 25°C (99.8%)                                                                                                                                                                                                                                                                                                                                                                                                                                                                             |                      |                                                    |                                                    |          |       |       |       |      |                 |       |       |       |      |                |       |       |
| Henry's law constant                                                                    | $1.36 * 10^{-3}$ Pa m <sup>3</sup> mol <sup>-1</sup> (25°C)                                                                                                                                                                                                                                                                                                                                                                                                                                                    |                      |                                                    |                                                    |          |       |       |       |      |                 |       |       |       |      |                |       |       |
| Solubility in water (state temperature, state purity and pH)                            | 15.2 ± 0.68 mg/L at 20°C (pH 4.4)                                                                                                                                                                                                                                                                                                                                                                                                                                                                              |                      |                                                    |                                                    |          |       |       |       |      |                 |       |       |       |      |                |       |       |
| Solubility in organic solvents (state temperature, state purity)                        | xylene: 50-57 g/L at 20°C (97%)<br>ethyl acetate: 57-67 g/L at 20°C (97%)<br>acetone: 143-167 g/L at 20°C (97%)<br>1,2-dichloroethane: 400-500 g/L at 20°C (97%)<br>methanol: 29.2 g/L at 20°C (97%)<br>heptane: 1.04 g/L at 20°C (97%)                                                                                                                                                                                                                                                                        |                      |                                                    |                                                    |          |       |       |       |      |                 |       |       |       |      |                |       |       |
| Surface tension (state concentration and temperature, state purity)                     | 71.8 mN/m at 20°C (90 % saturated solution) (97%)                                                                                                                                                                                                                                                                                                                                                                                                                                                              |                      |                                                    |                                                    |          |       |       |       |      |                 |       |       |       |      |                |       |       |
| Partition coefficient (state temperature, pH and purity)                                | log P <sub>ow</sub> = 2.8 at 20°C (pH 7.5) (99.7%)                                                                                                                                                                                                                                                                                                                                                                                                                                                             |                      |                                                    |                                                    |          |       |       |       |      |                 |       |       |       |      |                |       |       |
| Dissociation constant (state purity)                                                    | Not required. Phosmet does not dissociate in water                                                                                                                                                                                                                                                                                                                                                                                                                                                             |                      |                                                    |                                                    |          |       |       |       |      |                 |       |       |       |      |                |       |       |
| Flammability (state purity)                                                             | Non-flammable (97.0%)                                                                                                                                                                                                                                                                                                                                                                                                                                                                                          |                      |                                                    |                                                    |          |       |       |       |      |                 |       |       |       |      |                |       |       |
| Explosive properties (state purity)                                                     | Non-explosive (97.0%)                                                                                                                                                                                                                                                                                                                                                                                                                                                                                          |                      |                                                    |                                                    |          |       |       |       |      |                 |       |       |       |      |                |       |       |
| Oxidising properties (state purity)                                                     | Non-oxidising properties                                                                                                                                                                                                                                                                                                                                                                                                                                                                                       |                      |                                                    |                                                    |          |       |       |       |      |                 |       |       |       |      |                |       |       |

Summary of representative uses evaluated, for which all risk assessments needed to be completed (*Phosmet*)

(Regulation (EU) N° 284/2013, Annex Part A, points 3, 4)

| Crop and/or situation (a)                                                                  | Member State or Country | Product name    | F G or I (b) | Pests or Group of pests controlled (c)                                         | Preparation |                | Application       |                                                                     |                    |                                    | Application rate per treatment |                    |                        | PHI (days) (m) | Remarks |
|--------------------------------------------------------------------------------------------|-------------------------|-----------------|--------------|--------------------------------------------------------------------------------|-------------|----------------|-------------------|---------------------------------------------------------------------|--------------------|------------------------------------|--------------------------------|--------------------|------------------------|----------------|---------|
|                                                                                            |                         |                 |              |                                                                                | Type (d-f)  | Conc. a.s. (i) | method kind (f-h) | range of growth stages & season (j)                                 | number min-max (k) | Interval between application (min) | kg a.s./hL min-max (l)         | Water L/ha min-max | kg a.s./ha min-max (l) |                |         |
| <b>Citrus fruits</b><br><br>(0110000;<br>FC 0001)                                          | SEZ                     | Imidan<br>50 WP | F            | <i>Ceratitis capitata</i><br>(CERTCA)                                          | WP          | 500 g/kg       | Foliar spray      | 90 % of final fruit size to fruit ripe for consumption (BBCH 79-89) | 1                  | nr                                 | 0.025                          | 2000               | 0.5                    | 14             |         |
| <b>Pome fruits</b><br><br>(0130000; FP 0009)                                               | SEZ                     | Imidan<br>50 WP | F            | <i>Cydia pomonella</i><br>(CARPPO)                                             | WP          | 500 g/kg       | Foliar spray      | Flowers fading to advanced fruit ripening (BBCH 67-85)              | 2                  | 20                                 | 0.075                          | 1000               | 0.75                   | 28             |         |
| <b>Pome fruits</b><br><br>(0130000; FP 0009)                                               | CEZ                     | Imidan<br>50 WP | F            | <i>Cydia pomonella</i><br>(CARPPO)                                             | WP          | 500 g/kg       | Foliar spray      | Flowers fading to advanced fruit ripening (BBCH 67-85)              | 2                  | 20                                 | 0.05                           | 1000               | 0.5                    | 28             |         |
| <b>Peaches/Nectarines</b><br><br>( <i>Persica vulgaris</i> ;<br>0140030; FS 0245, FS 0247) | SEZ                     | Imidan<br>50 WP | F            | <i>Ceratitis capitata</i><br>(CERTCA)<br><i>Anarsia lineatella</i><br>(ANARLI) | WP          | 500 g/kg       | Foliar spray      | Fruit development to advanced fruit colouring (BBCH 71-85)          | 2                  | 10                                 | 0.07                           | 1000               | 0.7                    | 14             |         |

| Crop and/or situation (a)                                                                  | Member State or Country | Product name | F G or I (b) | Pests or Group of pests controlled (c)            | Preparation |                | Application       |                                     |                    |                                    | Application rate per treatment |                    |                        | PHI (days) (m) | Remarks |
|--------------------------------------------------------------------------------------------|-------------------------|--------------|--------------|---------------------------------------------------|-------------|----------------|-------------------|-------------------------------------|--------------------|------------------------------------|--------------------------------|--------------------|------------------------|----------------|---------|
|                                                                                            |                         |              |              |                                                   | Type (d-f)  | Conc. a.s. (i) | method kind (f-h) | range of growth stages & season (j) | number min-max (k) | Interval between application (min) | kg a.s./hL min-max (l)         | Water L/ha min-max | kg a.s./ha min-max (l) |                |         |
| <b>Potatoes</b><br><br><i>(Solanum tuberosum subsp. tuberosum,</i><br>0211000,<br>VR 0589) | CEZ                     | Imidan 50 WP | F            | <i>Leptino-tarsa decemlineata</i><br><br>(LPTNDE) | WP          | 500 g/kg       | Foliar spray      | Tuber formation (BBCH 40 - 49)      | 1                  | nr                                 | 0.1                            | 500                | 0.5                    | 7              |         |

- (a) For crops, the EU and Codex classifications (both) should be taken into account; where relevant, the use situation should be described (e.g. fumigation of a structure)
- (b) Outdoor or field use (F), greenhouse application (G) or indoor application (I)
- (c) e.g. biting and sucking insects, soil born insects, foliar fungi, weeds
- (d) e.g. wettable powder (WP), emulsifiable concentrate (EC), granule (GR)
- (e) CropLife International Technical Monograph no 2, 6th Edition. Revised May 2008. Catalogue of pesticide
- (f) All abbreviations used must be explained
- (g) Method, e.g. high volume spraying, low volume spraying, spreading, dusting, drench
- (h) Kind, e.g. overall, broadcast, aerial spraying, row, individual plant, between the plant- type of equipment used must be indicated
- (i) g/kg or g/L. Normally the rate should be given for the active substance (according to ISO) and not for the variant in order to compare the rate for same active substances used in different variants (e.g. fluoroxypyr). **In certain cases, where only one variant is synthesised, it is more appropriate to give the rate for the variant (e.g. benthiavalicarb-isopropyl).**
- (j) Growth stage range from first to last treatment (BBCH Monograph, Growth Stages of Plants, 1997, Blackwell, ISBN 3-8263-3152-4), including where relevant, information on season at time of application
- (k) Indicate the minimum and maximum number of applications possible under practical conditions of use
- (l) The values should be given in g or kg whatever gives the more manageable number (e.g. 200 kg/ha instead of 200 000 g/ha or 12.5 g/ha instead of 0.0125 kg/ha)
- (m) PHI - minimum pre-harvest interval

Summary of additional intended uses for which MRL applications have been made, that in addition to the uses above, have also been considered in the consumer risk assessment (*active substance: Phosmet*)

### Regulation (EC) N° 1107/2009 Article 8.1(g)

**Important note: efficacy, environmental risk and risk to humans by exposure other than via their diet have not been assessed for these uses**

| Crop and/or situation (a)                                                            | Member State or Country | Product name | F G or I (b) | Pests or Group of pests controlled (c) | Preparation |                | Application       |                                     |                    |                                    | Application rate per treatment |                    |                        | PHI (days) (m) | Remarks |
|--------------------------------------------------------------------------------------|-------------------------|--------------|--------------|----------------------------------------|-------------|----------------|-------------------|-------------------------------------|--------------------|------------------------------------|--------------------------------|--------------------|------------------------|----------------|---------|
|                                                                                      |                         |              |              |                                        | Type (d-f)  | Conc. a.s. (i) | method kind (f-h) | range of growth stages & season (j) | number min-max (k) | Interval between application (min) | kg a.s./hL min-max (l)         | Water L/ha min-max | kg a.s./ha min-max (l) |                |         |
| <b>MRL Application</b> (according to Article 8.1(g) of Regulation (EC) No 1107/2009) |                         |              |              |                                        |             |                |                   |                                     |                    |                                    |                                |                    |                        |                |         |
| Not applicable                                                                       |                         |              |              |                                        |             |                |                   |                                     |                    |                                    |                                |                    |                        |                |         |

- (a) For crops, the EU and Codex classifications (both) should be taken into account; where relevant, the use situation should be described (e.g. fumigation of a structure)
- (b) Outdoor or field use (F), greenhouse application (G) or indoor application (I)
- (c) e.g. biting and sucking insects, soil born insects, foliar fungi, weeds
- (d) e.g. wettable powder (WP), emulsifiable concentrate (EC), granule (GR)
- (e) CropLife International Technical Monograph no 2, 6th Edition. Revised May 2008. Catalogue of pesticide
- (f) All abbreviations used must be explained
- (g) Method, e.g. high volume spraying, low volume spraying, spreading, dusting, drench
- (h) Kind, e.g. overall, broadcast, aerial spraying, row, individual plant, between the plant- type of equipment used must be indicated
- (i) g/kg or g/L. Normally the rate should be given for the active substance (according to ISO) and not for the variant in order to compare the rate for same active substances used in different variants (e.g. fluoroxypyr). **In certain cases, where only one variant is synthesised, it is more appropriate to give the rate for the variant (e.g. benthiavalicarb-isopropyl).**
- (j) Growth stage range from first to last treatment (BBCH Monograph, Growth Stages of Plants, 1997, Blackwell, ISBN 3-8263-3152-4), including where relevant, information on season at time of application
- (k) Indicate the minimum and maximum number of applications possible under practical conditions of use
- (l) The values should be given in g or kg whatever gives the more manageable number (e.g. 200 kg/ha instead of 200 000 g/ha or 12.5 g/ha instead of 0.0125 kg/ha)
- (m) PHI - minimum pre-harvest interval

**Further information, Efficacy**

**Effectiveness**

All uses presented in this dossier are representative uses and registered at country level. Phosmet-based PPP's products, according to the proposed and subsequently authorized GAPs, showed a target pests control at least equivalent to any reference product used in the GAP efficacy registration trials.

**Adverse effects on field crops**

No adverse effects observed on representative crops – there are no reported selectivity or negative effects related to exposure of plants and produced fruits (fresh or processed) treated with phosmet PPP's.

**Observations on other undesirable or unintended side-effects**

There are no reported selectivity or negative effects on adjacent or succeeding crops, nor on plant organs used for propagation treated with phosmet PPP's or on non-target organisms.

**Groundwater metabolites: Screening for biological activity (SANCO/221/2000-rev.10-final Step 3 a Stage 1)**

|                                  |               |
|----------------------------------|---------------|
| Activity against target organism | Not relevant. |
|----------------------------------|---------------|

## Methods of Analysis

### Analytical methods for the active substance (Regulation (EU) N° 283/2013, Annex Part A, point 4.1 and Regulation (EU) N° 284/2013, Annex Part A, point 5.2)

|                                                     |                                                                      |
|-----------------------------------------------------|----------------------------------------------------------------------|
| Technical a.s. (analytical technique)               | HPLC-UV<br>Confirmation by HPLC-PDA and LC-MS                        |
| Impurities in technical a.s. (analytical technique) | HPLC-UV<br>Confirmation by HPLC-PDA and LC-MS                        |
| Plant protection product (analytical technique)     | Phosmet: HPLC-UV<br>Relevant impurities:<br>Toluene: GC-FID (MT 198) |

### Analytical methods for residues (Regulation (EU) N° 283/2013, Annex Part A, point 4.2 & point 7.4.2)

#### Residue definitions for monitoring purposes

|                         |                          |
|-------------------------|--------------------------|
| Food of plant origin    | Phosmet                  |
| Food of animal origin   | Phosmet, open            |
| Soil                    | Phosmet                  |
| Sediment                | Phosmet                  |
| Water surface           | Phosmet                  |
| drinking/ground         | Phosmet                  |
| Air                     | Phosmet                  |
| Body fluids and tissues | Phosmet and phosmet-oxon |

#### Monitoring/Enforcement methods

|                                                                                               |                                                        |
|-----------------------------------------------------------------------------------------------|--------------------------------------------------------|
| Food/feed of plant origin (analytical technique and LOQ for methods for monitoring purposes)  | HPLC-MS/MS<br>LOQ: 0.01 mg/kg phosmet and phosmet-oxon |
| Food/feed of animal origin (analytical technique and LOQ for methods for monitoring purposes) | HPLC-MS/MS<br>LOQ: 0.01 mg/kg phosmet and phosmet-oxon |
| Soil (analytical technique and LOQ)                                                           | HPLC-MS/MS<br>LOQ: 0.01 mg/kg phosmet                  |
| Water (analytical technique and LOQ)                                                          | HPLC-MS/MS<br>LOQ: 0.05 µg/L phosmet                   |
| Air (analytical technique and LOQ)                                                            | GC-NPD<br>LOQ: 0.3 µg/m <sup>3</sup> phosmet           |



Body fluids and tissues (analytical technique and LOQ)

Phosmet in body fluids:  
 HPLC-MS/MS  
 LOQ: 0.05 mg/L phosmet  
 For phosmet in body tissues please refer to food/feed of animal origin.

Phosmet-oxon in body fluids and tissues:  
 HPLC-MS/MS  
 LOQ: 0.01 mg/L phosmet-oxon (body fluids)  
 LOQ: 0.1 mg/kg phosmet-oxon (body tissues)

**Classification and labelling with regard to physical and chemical data (Regulation (EU) N° 283/2013, Annex Part A, point 10)**

Substance

Harmonised classification according to Regulation (EC) No 1272/2008 and its Adaptations to Technical Process [Table 3.1 of Annex VI of Regulation (EC) No 1272/2008 as amended]<sup>1</sup>:

According to the Peer review, the criteria for classification may be met for:

| Phosmet |
|---------|
| none    |
| none    |

<sup>1</sup> Regulation (EC) No 1272/2008 of the European Parliament and of the Council of 16 December 2008 on classification, labelling and packaging of substances and mixtures, amending and repealing Directives 67/548/EEC and 1999/45/EC, and amending Regulation (EC) No 1907/2006. OJ L 353, 31.12.2008, 1-1355.

## Impact on Human and Animal Health

### Absorption, distribution, metabolism and excretion (toxicokinetics) (Regulation (EU) N° 283/2013, Annex Part A, point 5.1)

|                                                             |                                                                                                                                                                                                                                                                                                                                                                                                           |
|-------------------------------------------------------------|-----------------------------------------------------------------------------------------------------------------------------------------------------------------------------------------------------------------------------------------------------------------------------------------------------------------------------------------------------------------------------------------------------------|
| Rate and extent of oral absorption/systemic bioavailability | Rapid and almost complete (84 % within 24 h) after single dose application.                                                                                                                                                                                                                                                                                                                               |
| Toxicokinetics                                              | <p><u>C<sub>max</sub></u> (µg-eq/g): 524.6 and 9699.3, single administration of 1 or 25 mg/kg bw, respectively.</p> <p><u>T<sub>max</sub></u> (hours): 0.5h</p> <p>Half-lives (t<sub>1/2</sub>) distribution phase: 0.2 to 6.0 h</p> <p>Half-lives (t<sub>1/2</sub>) elimination phase: 41 to 1543 h</p>                                                                                                  |
| Distribution                                                | Widely distributed. Highest levels in whole blood (Rat).                                                                                                                                                                                                                                                                                                                                                  |
| Potential for bioaccumulation                               | No evidence of accumulation (rat)                                                                                                                                                                                                                                                                                                                                                                         |
| Rate and extent of excretion                                | <p>Mainly via urine (70 - 80 % at 24 h) but also via faeces (5 - 10 % at 24 h).</p> <p>Biliary excretion not measured (due to almost complete oral absorption and predominantly urinary excretion).</p>                                                                                                                                                                                                   |
| Metabolism in animals                                       | Involved thiophosphoryl hydrolysis, S-methylation, oxidation of the sulfur to the sulfoxide (U3) and to the sulfone (U6), hydrolysis of the phthalimide ring to the respective phthalimide acid. Two major metabolites were identified in urine: N-(methylsulfinylmethyl)-phthalamic acid (PaAMS(O)M) and the corresponding sulfoxide N-(methylsulfonylmethyl)-phthalamic acid (PaAMS(O <sub>2</sub> )M). |
| <i>In vitro</i> metabolism                                  | <p>After incubation to rat liver microsomes [<sup>14</sup>C] Phosmet was rapidly metabolised. The major metabolite fraction was identified as Phosmet-oxon.</p> <p>All metabolites found in human (including Phosmet-oxon) were also detected in rat, dog and mouse hepatocytes. Unique human metabolites were not identified.</p>                                                                        |
| Toxicologically relevant compounds (animals and plants)     | Phosmet and phosmet-oxon                                                                                                                                                                                                                                                                                                                                                                                  |
| Toxicologically relevant compounds (environment)            | Phosmet                                                                                                                                                                                                                                                                                                                                                                                                   |

### Acute toxicity (Regulation (EU) N° 283/2013, Annex Part A, point 5.2)

|                                |                              |                         |
|--------------------------------|------------------------------|-------------------------|
| Rat LD <sub>50</sub> oral      | 230 mg/kg bw<br>113 mg/kg bw | Acute<br>Tox. 3<br>H301 |
| Rat LD <sub>50</sub> dermal    | > 1000 mg/kg bw              |                         |
| Rabbit LD <sub>50</sub> dermal | > 5000 mg/kg bw              |                         |

|                                 |                                                                    |                         |
|---------------------------------|--------------------------------------------------------------------|-------------------------|
| Rat LC <sub>50</sub> inhalation | > 0.152 mg/L air / 4h (whole body exposure)                        | Acute<br>Tox. 4<br>H332 |
| Skin irritation                 | Non-irritant                                                       |                         |
| Eye irritation                  | Moderate irritant                                                  |                         |
| Skin sensitisation              | Non-sensitising (modified Buehler test, 10 induction applications) |                         |
| Phototoxicity                   | No phototoxic potential                                            |                         |

### Short-term toxicity (Regulation (EU) N° 283/2013, Annex Part A, point 5.3)

|                                |                                                                                |  |
|--------------------------------|--------------------------------------------------------------------------------|--|
| Target organ / critical effect | Plasma, RBC and brain: inhibition of cholinesterase (ChE) activity             |  |
| Relevant oral NOAEL            | Overall NOAEL: 1.88 mg/kg bw per day (90 day rat, 28-day mouse and 90-day dog) |  |
| Relevant dermal NOAEL          | 22.5 mg/kg bw per day (rat 21-days)                                            |  |
| Relevant inhalation NOAEL      | No data. No required                                                           |  |

### Genotoxicity (Regulation (EU) N° 283/2013, Annex Part A, point 5.4)

|                            |                                                                                                                                                           |  |
|----------------------------|-----------------------------------------------------------------------------------------------------------------------------------------------------------|--|
| <i>In vitro</i> studies    | Positive <i>in</i> bacterial reverse mutation and mammalian forward mutation studies without S9B. Negative in mammalian forward mutation studies with S9B |  |
| <i>In vivo</i> studies     | <i>In vivo</i> micronucleus and UDS tests negative.                                                                                                       |  |
| Photomutagenicity          | Not necessary                                                                                                                                             |  |
| Potential for genotoxicity | Weight of evidence indicates that phosmet is unlikely to be genotoxic <i>in vivo</i> .                                                                    |  |

### Long-term toxicity and carcinogenicity (Regulation (EU) N°283/2013, Annex Part A, point 5.5)

|                                                  |                                                                                                                                                               |  |
|--------------------------------------------------|---------------------------------------------------------------------------------------------------------------------------------------------------------------|--|
| Long-term effects (target organ/critical effect) | Reductions of RBC and brain AChE activity<br>Mice: convulsions (males), liver/ cytoplasmic hepatocellular vacuolated degeneration and hepatocellular adenomas |  |
| Relevant long-term NOAEL                         | Rat: 1.8 mg/kg bw per day (2-yr, supportive)<br>Mouse: 4 mg/kg bw per day (2-yr)                                                                              |  |
| Carcinogenicity (target organ, tumour type)      | Negative in rats.<br>Increased liver tumours at 14 mg/kg bw per day (highest dose level) in mice.                                                             |  |
| Relevant NOAEL for carcinogenicity               | Rat : 9.4 mg/kg bw per day (2-yr)<br>Mouse: 4 mg/kg bw per day (2-yr)                                                                                         |  |

**Reproductive toxicity (Regulation (EU) N° 283/2013, Annex Part A, point 5.6)**

|                                       |                                                                                                                                                                                                                                                                                        |                                        |
|---------------------------------------|----------------------------------------------------------------------------------------------------------------------------------------------------------------------------------------------------------------------------------------------------------------------------------------|----------------------------------------|
| Reproduction target / critical effect | Parental toxicity: inhibition RBC AChE activity (40%), decreased body weight and [REDACTED]<br>[REDACTED]<br>[REDACTED]<br>Reproductive toxicity: [REDACTED]<br>[REDACTED]<br>Offspring toxicity: Pup survival reduction and the mean pup bodyweight decreased at maternal toxic dose. |                                        |
| Relevant parental NOAEL               | [REDACTED]                                                                                                                                                                                                                                                                             |                                        |
| Relevant reproductive NOAEL           | [REDACTED]                                                                                                                                                                                                                                                                             | [REDACTED]<br>[REDACTED]<br>[REDACTED] |
| Relevant offspring NOAEL              | 80 ppm (equivalent to 4.2-mg/kg bw per day)                                                                                                                                                                                                                                            |                                        |

**Developmental toxicity**

|                                        |                                                                                                                                                                                                                                           |  |
|----------------------------------------|-------------------------------------------------------------------------------------------------------------------------------------------------------------------------------------------------------------------------------------------|--|
| Developmental target / critical effect | Maternal toxicity :<br>Rat/Rabbit : decreased bodyweight gain in the dams (by 20%).<br>Developmental toxicity :<br>Rat/Rabbit : decreased foetus weight.<br>Increased incidence of variations (rabbit)<br>Not teratogenic in rat / rabbit |  |
| Relevant maternal NOAEL                | Rat/Rabbit : 5 mg/kg bw per day                                                                                                                                                                                                           |  |
| Relevant developmental NOAEL           | Rat : 10 mg/kg bw per day<br>Rabbit : 5 mg/kg bw per day                                                                                                                                                                                  |  |

**Neurotoxicity (Regulation (EU) N° 283/2013, Annex Part A, point 5.7)**

|                                                                              |                                                                                                                                                                        |  |
|------------------------------------------------------------------------------|------------------------------------------------------------------------------------------------------------------------------------------------------------------------|--|
| Acute neurotoxicity                                                          | Decreased plasma, RBC and brain cholinesterase activity<br>NOAEL = 4.5 mg/kg bw<br>Classification STOT SE 1 proposed                                                   |  |
| Repeated neurotoxicity                                                       | Decreased RBC AChE Activity<br>NOAEL = 1.5mg/kg bw per day                                                                                                             |  |
| Additional studies (e.g. delayed neurotoxicity, developmental neurotoxicity) | No potential to produce delayed neurotoxicity in the acute study in hens.<br>[REDACTED]<br>[REDACTED]                                                                  |  |
| Other studies                                                                | 1.Comparative inhibition of ChE between adults and pups rats : Pups (postnatal day 11) were more sensitive than adult rats after a single or repeated (7 days) phosmet |  |

|                                                                                                                                                                                                                                                                                                                                                                                                                                                                                                                                                                                                                                                                                                                                                                |  |
|----------------------------------------------------------------------------------------------------------------------------------------------------------------------------------------------------------------------------------------------------------------------------------------------------------------------------------------------------------------------------------------------------------------------------------------------------------------------------------------------------------------------------------------------------------------------------------------------------------------------------------------------------------------------------------------------------------------------------------------------------------------|--|
| <p>administration ; sex were not determinant for ChE depression ;</p> <p>2. Plasma/RBC ChE activity were more sensitive than Brain AchE to phosmet exposure.</p> <p><u>3. RBC AchE depression:</u></p> <p>-NOAEL single admin = 2.5 and 5 mg/kg bw for pups and adults, respectively</p> <p>-LOAEL repeated admin. = 1.25 mg/kg bw/day.</p> <p>4. Comparative cholinesterase study of phosmet technical in pregnant rat dams and their fetuses</p> <p>Following gavage administration to dams - once daily by gavage on DG 6 through DG 20- in rats, mothers were more sensitive than their fetuses to phosmet effects on ChEs,</p> <p><u>RBC AchE depression:</u></p> <p>LOAEL mothers = 1.5 mg/kg bw per day</p> <p>NOAEL-fetuses = 1.5 mg/kg bw per day</p> |  |
|----------------------------------------------------------------------------------------------------------------------------------------------------------------------------------------------------------------------------------------------------------------------------------------------------------------------------------------------------------------------------------------------------------------------------------------------------------------------------------------------------------------------------------------------------------------------------------------------------------------------------------------------------------------------------------------------------------------------------------------------------------------|--|

### Other toxicological studies (Regulation (EU) N° 283/2013, Annex Part A, point 5.8)

Supplementary studies on the active substance

No immunotoxic potential in the available data

In vitro ChE inhibition:

In mice, RBC AChE activity showed to be more inhibited than brain AChE activity after phosmet exposure.

Rat RBC AChE activity was slightly more depressed than human RBC AChE activity after in vitro exposure to phosmet, therefore, the interspecies factor can be reduced when reference doses are set.

Endocrine  
properties

disrupting

Endocrine disrupting properties

ER Binding Assay (Rat uterine cytosol): classified as “non-interacting”.

ER $\alpha$  Transcriptional Activation Assay (Human cell line HeLa 9903): was not an agonist of human estrogen receptor alpha (hER $\alpha$ ) in the HeLa-9903 model system.

AR Binding Assay (Rat prostate cytosol): classified as a “binder”.

Aromatase Assay (Human recombinant microsomes): classified as an inhibitor of aromatase activity.

Steroidogenesis Assay (Human cell line H295R): not considered to be an inducer or inhibitor of estradiol or testosterone.

Hershberger Assay (Rat): negative for androgenic activity and positive for anti-androgenicity (at a dose that resulted in overt toxicity)

Uterotrophic Assay (Rat): negative in the uterotrophic assay (no statistically significant changes were seen in uterine weight).

Pubertal Male and Female Assay (Rat): Oral administration up to 20 mg/kg bw/d did not evoke a disruption in pubertal development or thyroid function in both sexes (highest dose met, but not exceeded the MTD)

Results of the Tier 1 screening assays: Phosmet is not considered to display the potential to act as an endocrine disruptor via the estrogen, androgen or T-hormone pathways.

Based on short-term and long-term studies, sex organs or the thyroid gland were not identified as targets of phosmet-related toxicity. No phosmet-related changes in relevant organ weights (m/f sex organs, thyroid gland) or macroscopic and/or microscopic findings in the potential target organs that would be indicative of ED effects.

According to the ECHA/EFSA (2018) Guidance for the identification of endocrine disruptors in the context of Regulations (EU) No 528/2012 and (EC) No 1107/2009, the ED criteria for humans are not met for phosmet.

Phosmet seems to have no potential to interact with the estrogen androgen or thyroid pathways. Effects on Non-EAT pathways, atypical EAT pathways and neuroendocrine pathways were not assessed.

Studies performed on metabolites or impurities

Results QSAR Toolbox3 for a.s. and related metabolites:

**Phthalimide** : the same alert as phosmet for *in vivo* mutagenicity (Micronucleus) and Keratinocyte gene expression. Different alert from phosmet in developmental and reproductive toxicity.

**Phthalamic acid**: the same alert as phosmet for *in vivo* mutagenicity (Micronucleus). Different alert from phosmet for chromosomal aberration.

**Phthalic acid**: the same alert as phosmet for *in vivo* mutagenicity (Micronucleus). Different alert from phosmet for non genotoxic carcinogenicity.

Results from QSAR Tooltree v.3.1.0, VEGA v.1.2.4 and v.1.1.4, U.S. EPA T.E.S.T. v.4.1 and Derek Nexus v. 6.0.1 :

**Phosmet-oxon**: Toxtree predicted DNA and protein binding alerts (as for Phosmet for which was discarded). In Vega tool, Ames test lower than Phosmet. Equivocal for mutagenicity in a Derek Nexus analysis, due to an alkyl ester structure of phosphoric or phosphonic acid (as for Phosmet).

**Desmethyl-phosmet** : In Vega tool, Ames test prediction is lower than to Phosmet.

**Phthalimide**: Vega tool in most cases negative for mutagenicity (one case positive, out of domain). Negative for genotoxicity with all four U.S. EPA T.E.S.T modules.

**Phthalic acid**: All five Vega modules contain a negative experimental Ames test result for Phthalic acid. negative for genotoxicity with all four U.S. EPA T.E.S.T modules.

**Phthalamic acid** : as for phthalimide.

Conclusions for the metabolites<sup>3</sup> :

████████████████████████████████████████████████████████████████████████████████

████████████████████████████████████████████████████████████████████████████████

**Phthalimide**: unlikely to be genotoxic. Same reference values of folpet.

**Phthalamic acid** : unlikely to be genotoxic. Same reference values of folpet.

████████████████████████████████████████████████████████████████████████████████

### Medical data (Regulation (EU) N° 283/2013, Annex Part A, point 5.9)

There were no incidents, illness, side effects or deaths reported during phosmet production in manufacturing plant personnel. However, many cases of accidental poisonings were reported from several databases. Symptoms of poisoning were typical of ChE inhibition. As soon as possible, pharmacological treatment should be carried out with atropine sulfate as antidote.

**Summary<sup>2</sup> (Regulation (EU) N°1107/2009, Annex II, point 3.1 and 3.6)**

|                                                  | Value<br>(mg/kg bw (per day)) | Study      | Uncertainty factor |
|--------------------------------------------------|-------------------------------|------------|--------------------|
| Acceptable Daily Intake (ADI)                    | [REDACTED]                    | [REDACTED] | [REDACTED]         |
| Acute Reference Dose (ARfD)                      | [REDACTED]                    | [REDACTED] | [REDACTED]         |
| Acceptable Operator Exposure Level (AOEL)        | [REDACTED]                    | [REDACTED] | [REDACTED]         |
| Acute Acceptable Operator Exposure Level (AAOEL) | [REDACTED]                    | [REDACTED] | [REDACTED]         |

<sup>3</sup>Pesticide Peer Review Meeting 22: Reference value for Phthalimide and Phthalamic acid: same of a.s Folpet ( ADI = 0,1 mg/Kg bw/d ; ARfD= 0.6 mg/Kg bw/d). [REDACTED]

<sup>4</sup>Pesticide Peer Review Meeting 22 : [REDACTED] and were taken into consideration when setting the reference values with an [REDACTED]

**Dermal absorption (Regulation (EU) N° 284/2013, Annex Part A, point 7.3)**

Representative formulation: Imidan 50 WP  
(WP formulation containing 500 g/kg Phosmet)

|                  |                                                               |
|------------------|---------------------------------------------------------------|
| Concentrate:     | 0.7%                                                          |
| Spray dilution : | 4.0 % for pome/stone fruits, potatoes<br>8% for citrus fruits |

**Exposure scenarios (Regulation (EU) N° 284/2013, Annex Part A, point 7.2)**

Operators

|                                                                                                                 |                  |
|-----------------------------------------------------------------------------------------------------------------|------------------|
| <b>Use: citrus fruits, application rate 500 g a.s./ha (1x);<br/>Tractor mounted equipment, upward spraying:</b> |                  |
| <u>Exposure estimates</u> (model):                                                                              | <u>% of AOEL</u> |
| <u>EFSA model</u> [long-term]                                                                                   |                  |
| With work wear:                                                                                                 | [REDACTED]       |

<sup>2</sup> If available include also reference values for metabolites



Workers

|                                                                                                                                                |                  |
|------------------------------------------------------------------------------------------------------------------------------------------------|------------------|
| With PPE (personal protective equipment: gloves), and RPE (respiratory protective equipment) during M/L (mixing/loading); and A (application): | █                |
| With PPE and mitigation measures (water soluble bags, closed cabin):                                                                           | █                |
| <b>Use: pome fruits, application rate 750 g a.s./ha (2x); Tractor mounted equipment, upward spraying:</b>                                      |                  |
| <u>Exposure estimates (model):</u>                                                                                                             | <u>% of AOEL</u> |
| <u>EFSA model [long-term]</u>                                                                                                                  |                  |
| With work wear:                                                                                                                                | █                |
| With PPE (gloves) and RPE during M/L and A                                                                                                     | █                |
| With PPE and mitigation measures (water soluble bags, closed cabin):                                                                           | █                |
| <b>Use: stone fruits, application rate 700 g a.s./ha (2x); Tractor mounted equipment, upward spraying:</b>                                     |                  |
| <u>Exposure estimates (model):</u>                                                                                                             | <u>% of AOEL</u> |
| <u>EFSA model [long-term]</u>                                                                                                                  |                  |
| With work wear:                                                                                                                                | █                |
| With PPE (gloves) and RPE during M/L and A:                                                                                                    | █                |
| With PPE and mitigation measures (water soluble bags, closed cabin):                                                                           | █                |
| <b>Use: potatoes, application rate 500 g a.s./ha (1x); Tractor mounted equipment, downward spraying:</b>                                       |                  |
| <u>Exposure estimates (model):</u>                                                                                                             | <u>% of AOEL</u> |
| <u>EFSA model [long-term]</u>                                                                                                                  |                  |
| With work wear:                                                                                                                                | █                |
| With PPE (gloves) and RPE during M/L and A:                                                                                                    | █ █              |
| With PPE and mitigation measures (drift reduction, water soluble bags, closed cabin):                                                          | █                |
| <b>Use: citrus fruits, application rate 500 g a.s./ha (1x); with PPE / with refinement (experimental DFR value for direct re-entry):</b>       |                  |
| <u>Exposure estimates (EFSA model):</u>                                                                                                        | <u>% of AOEL</u> |
| Without PPE (work wear as basis):                                                                                                              | █                |
| With PPE (gloves):                                                                                                                             | █                |
| <b>Use: pome fruits, application rate 750 g a.s./ha (2x); with refinement (experimental DFR value for direct re-entry):</b>                    |                  |
| <u>Exposure estimates (EFSA model):</u>                                                                                                        | <u>% of AOEL</u> |
| Without PPE (work wear as basis):                                                                                                              | █                |
| With PPE (gloves):                                                                                                                             | █                |

Bystanders and residents

|                                                                                                                              |                   |
|------------------------------------------------------------------------------------------------------------------------------|-------------------|
| <b>Use: stone fruits, application rate 700 g a.s./ha (2x); with refinement (experimental DFR value for direct re-entry):</b> |                   |
| <u>Exposure estimates (EFSA model):</u>                                                                                      | <u>% of AOEL</u>  |
| Without PPE (work wear as basis):                                                                                            | ■                 |
| With PPE (gloves):                                                                                                           | ■                 |
| <b>Use: potatoes, application rate 500 g a.s./ha (1x);</b>                                                                   |                   |
| <u>Exposure estimates (EFSA model):</u>                                                                                      | <u>% of AOEL</u>  |
| Without PPE (work wear as basis):                                                                                            | ■                 |
| <b>Use: citrus fruits, application rate 500 g a.s./ha (1x); Tractor application, buffer zone 10 m</b>                        |                   |
| <u>Bystander:</u>                                                                                                            |                   |
| <u>Exposure estimates (EFSA model):</u>                                                                                      | <u>% of AAOEL</u> |
| Adult (spray drift):                                                                                                         | ■                 |
| Adult (vapour):                                                                                                              | ■                 |
| Adult (surface deposits):                                                                                                    | ■                 |
| Adult (entry into crops):                                                                                                    | ■                 |
| Child (spray drift):                                                                                                         | ■                 |
| Child (vapour):                                                                                                              | ■                 |
| Child (surface deposits):                                                                                                    | ■                 |
| Child (entry into crops):                                                                                                    | ■                 |
| <u>Resident:</u>                                                                                                             |                   |
| <u>Exposure estimates (EFSA model):</u>                                                                                      | <u>% of AOEL</u>  |
| Adult (all pathways):                                                                                                        | ■                 |
| Child (all pathways):                                                                                                        | ■                 |
| <b>Use: pome fruits, application rate 750 g a.s./ha (2x); Tractor application, buffer zone 10 m:</b>                         |                   |
| <u>Bystander:</u>                                                                                                            |                   |
| <u>Exposure estimates (EFSA model):</u>                                                                                      | <u>% of AAOEL</u> |
| Adult (spray drift):                                                                                                         | ■                 |
| Adult (vapour):                                                                                                              | ■                 |
| Adult (surface deposits):                                                                                                    | ■                 |
| Adult (entry into crops):                                                                                                    | ■                 |
| Child (spray drift):                                                                                                         | ■                 |
| Child (vapour):                                                                                                              | ■                 |
| Child (surface deposits):                                                                                                    | ■                 |
| Child (entry into crops):                                                                                                    | ■                 |
| <u>Resident:</u>                                                                                                             |                   |
| <u>Exposure estimates (EFSA model):</u>                                                                                      | <u>% of AOEL</u>  |
| Adult (all pathways):                                                                                                        | ■ ■               |
| Child (all pathways):                                                                                                        | ■ ■               |
| <b>Use: stone fruits, application rate 700 g a.s./ha (2x); Tractor, buffer zone 10 m:</b>                                    |                   |
| <u>Bystander:</u>                                                                                                            |                   |
| <u>Exposure estimates (EFSA model):</u>                                                                                      | <u>% of AAOEL</u> |

|                                                       |            |
|-------------------------------------------------------|------------|
| Adult (spray drift):                                  | ■          |
| Adult (vapour):                                       | ■          |
| Adult (surface deposits):                             | ■          |
| Adult (entry into crops):                             | ■          |
| Child (spray drift):                                  | ■          |
| Child (vapour):                                       | ■          |
| Child (surface deposits):                             | ■          |
| Child (entry into crops):                             | ■          |
| <u>Resident:</u>                                      |            |
| <u>Exposure estimates</u> (EFSA model):               | % of AOEL  |
| Adult (all pathways):                                 | ■          |
| Child (all pathways):                                 | ■          |
| <br>                                                  |            |
| <b>Use: potatoes, application rate 500 g a.s./ha;</b> |            |
| <b>Tractor buffer zone 10 m:</b>                      |            |
| <u>Bystander:</u>                                     |            |
| <u>Exposure estimates</u> (EFSA model):               | % of AAOEL |
| Adult (spray drift):                                  | ■          |
| Adult (vapour):                                       | ■          |
| Adult (surface deposits):                             | ■          |
| Adult (entry into crops):                             | ■          |
| Child (spray drift):                                  | ■          |
| Child (vapour):                                       | ■          |
| Child (surface deposits):                             | ■          |
| Child (entry into crops):                             | ■          |
| <u>Resident:</u>                                      |            |
| <u>Exposure estimates</u> (EFSA model):               | % of AOEL  |
| Adult (all pathways):                                 | ■ ■        |
| Child (all pathways):                                 | ■ ■        |

**Classification with regard to toxicological data (Regulation (EU) N° 283/2013, Annex Part A, Section 10)**

Substance :

Harmonised classification according to Regulation (EC) No 1272/2008 and its Adaptations to Technical Process [Table 3.1 of Annex VI of Regulation (EC) No 1272/2008 as amended]<sup>3</sup> :

According to the Peer review, the criteria for classification may be met for:

|                                                                                                                            |
|----------------------------------------------------------------------------------------------------------------------------|
| Phosmet                                                                                                                    |
| Acute Tox. 4, H302 "Toxic if swallowed"<br>Acute Tox. 4, H312 "Harmful in contact with skin"<br>■                          |
| Acute Tox. 3, H301 "Toxic if swallowed"<br>Acute Tox. 4, H332 "Harmful if inhaled"<br>STOT SE 1 H372 (nervous system)<br>■ |

<sup>3</sup> Regulation (EC) No 1272/2008 of the European Parliament and of the Council of 16 December 2008 on classification, labelling and packaging of substances and mixtures, amending and repealing Directives 67/548/EEC and 1999/45/EC, and amending Regulation (EC) No 1907/2006. OJ L 353, 31.12.2008, 1-1355.

## Residues in or on treated products food and feed

## Metabolism in plants (Regulation (EU) N° 283/2013, Annex Part A, points 6.2.1, 6.5.1, 6.6.1 and 6.7.1)

|                                                                                                                                                                                                                                 |                           |                |                                                                                    |              |                 |                                                                                                     |                                                                                                                                |  |
|---------------------------------------------------------------------------------------------------------------------------------------------------------------------------------------------------------------------------------|---------------------------|----------------|------------------------------------------------------------------------------------|--------------|-----------------|-----------------------------------------------------------------------------------------------------|--------------------------------------------------------------------------------------------------------------------------------|--|
| <b>Primary crops</b><br>(Plant groups covered)<br><b>OECD Guideline 501</b>                                                                                                                                                     | <b>Crop groups</b>        | <b>Crop(s)</b> | <b>Application(s)</b>                                                              |              |                 |                                                                                                     | <b>DAT (days)</b>                                                                                                              |  |
|                                                                                                                                                                                                                                 | Fruit                     | Cherries       | Foliar<br>1 x 0.42 kg a.s./hL (~6-8N)                                              |              |                 |                                                                                                     | 0, 7, 14                                                                                                                       |  |
|                                                                                                                                                                                                                                 |                           | Apples         | Foliar<br>2 x 0.8 a.s./ha (~1N)<br>(BBCH 75 – 76 and BBCH 78)                      |              |                 |                                                                                                     | 0, 14, 28                                                                                                                      |  |
|                                                                                                                                                                                                                                 | Root crops                | Potatoes       | Foliar<br>4 x max. 2 kg a.s./ha (~3-4N)<br>(days 0, 40, 60 and 88)                 |              |                 |                                                                                                     | 1 <sup>st</sup> treatment: 40<br>2 <sup>nd</sup> treatment: 60<br>3 <sup>rd</sup> treatment: 7<br>4 <sup>th</sup> treatment: 7 |  |
|                                                                                                                                                                                                                                 | Cereal/<br>Grass<br>crops | Maize          | Foliar<br>2 x 1.12 kg a.s./ha<br>(silk stage, and 14 days before<br>final harvest) |              |                 |                                                                                                     | 1st treatment: 28, 76<br>2nd treatment: 14                                                                                     |  |
| The metabolism was investigated [REDACTED]<br>[REDACTED]<br>Information on the storage time intervals and conditions of the samples in the metabolism studies of cherry potato and maize was not available ( <b>data gap</b> ). |                           |                |                                                                                    |              |                 |                                                                                                     |                                                                                                                                |  |
| <b>Rotational crops</b><br>(metabolic pattern)<br><b>OECD Guideline 502</b>                                                                                                                                                     | <b>Crop groups</b>        | <b>Crop(s)</b> | <b>PBI (days)</b>                                                                  |              |                 | <b>Comments</b>                                                                                     |                                                                                                                                |  |
|                                                                                                                                                                                                                                 | Root/tuber crops          |                |                                                                                    |              |                 | Not required as phosmet DT <sub>90</sub> <100 days and relevant metabolites in soil were not found. |                                                                                                                                |  |
|                                                                                                                                                                                                                                 | Leafy crops               |                |                                                                                    |              |                 |                                                                                                     |                                                                                                                                |  |
|                                                                                                                                                                                                                                 | Cereal (small grain)      |                |                                                                                    |              |                 |                                                                                                     |                                                                                                                                |  |
|                                                                                                                                                                                                                                 | Other                     |                |                                                                                    |              |                 |                                                                                                     |                                                                                                                                |  |
| Rotational crop and primary crop metabolism similar?                                                                                                                                                                            | Not applicable            |                |                                                                                    |              |                 |                                                                                                     |                                                                                                                                |  |
| <b>Processed commodities</b><br><b>OECD Guideline 507</b><br><br><b>Study 1</b>                                                                                                                                                 | <b>Conditions</b>         | Phosmet        | Desmethyl-phosmet                                                                  | Phthali-mide | Phthalamic acid | Phthalic acid                                                                                       | N-hydroxymethyl Phthalamic acid                                                                                                |  |
|                                                                                                                                                                                                                                 | 20 min, 90°C, pH 4        | 83.6%          | (b)                                                                                | 3.9%         | (a)             | (a)                                                                                                 | (a)                                                                                                                            |  |
|                                                                                                                                                                                                                                 | 60 min, 100°C, pH 5       | 41.9%          | (b)                                                                                | 29.9 %       | (a)             | (a)                                                                                                 | (a)                                                                                                                            |  |
|                                                                                                                                                                                                                                 | 20 min, 120°C, pH 6       | 2.1%           | (b)                                                                                | 11.8%        | 19.5%           | 15.4%                                                                                               | 50.6%                                                                                                                          |  |

|                                                                                                     |                                                                                                                                                                                                                                                                                               |       |       |       |       |       |     |
|-----------------------------------------------------------------------------------------------------|-----------------------------------------------------------------------------------------------------------------------------------------------------------------------------------------------------------------------------------------------------------------------------------------------|-------|-------|-------|-------|-------|-----|
| <b>Study 2</b>                                                                                      | 20min, 90°C, pH 4                                                                                                                                                                                                                                                                             | 84.2% | 5.4%  | 1.2%  | 3.4%  | 5.8%  | (b) |
|                                                                                                     | 60 min, 100°C, pH 5                                                                                                                                                                                                                                                                           | 21.3% | 14.5% | 10.1% | 13.9% | 40.2% | (b) |
|                                                                                                     | 20 min, 120°C, pH 6                                                                                                                                                                                                                                                                           | (a)   | (a)   | (a)   | 1.4%  | 98.6% | (b) |
| Residue pattern in processed commodities similar to residue pattern in raw commodities?             | Two standard hydrolysis studies were submitted showing that degradation products were either different or occurred in notably different amounts.<br>Scientific justification to clarify the discrepancy between the results or confirmatory investigations are necessary ( <b>data gap</b> ). |       |       |       |       |       |     |
| Plant residue definition for monitoring (RD-Mo)<br><b>OECD Guidance, series on pesticides No 31</b> | Phosmet                                                                                                                                                                                                                                                                                       |       |       |       |       |       |     |
| Plant residue definition for risk assessment (RD-RA)                                                | Phosmet, phosmet-oxon, [REDACTED]<br>[REDACTED]<br>[REDACTED]                                                                                                                                                                                                                                 |       |       |       |       |       |     |
| Conversion factor (monitoring to risk assessment)                                                   | Not concluded                                                                                                                                                                                                                                                                                 |       |       |       |       |       |     |

(a) Not detected upon analysis.

(b) Not reported.

### Metabolism in livestock (Regulation (EU) N° 283/2013, Annex Part A, points 6.2.2, 6.2.3, 6.2.4, 6.2.5 6.7.1)

| <b>OECD Guideline 503 and SANCO/11187/2013 rev. 3 (fish)</b>                                         | <b>Animal</b>                                                                                                                                                                                                                                                                                                             | <b>Dose (mg/kg bw/d)</b>                                   | <b>Duration (days)</b> | <b>N rate/comment</b>   |
|------------------------------------------------------------------------------------------------------|---------------------------------------------------------------------------------------------------------------------------------------------------------------------------------------------------------------------------------------------------------------------------------------------------------------------------|------------------------------------------------------------|------------------------|-------------------------|
| <b>Animals covered</b>                                                                               | Laying hen                                                                                                                                                                                                                                                                                                                | 0.73 mg/kg bw/d                                            | 7 days                 | 365N, carbonyl-labelled |
|                                                                                                      | Goat/Cow                                                                                                                                                                                                                                                                                                                  | 0.3 mg/kg bw/d                                             | 4 days                 | 43N, carbonyl-labelled  |
|                                                                                                      | Pig                                                                                                                                                                                                                                                                                                                       | Not relevant as metabolism in rat and ruminant is similar. |                        |                         |
|                                                                                                      | Fish                                                                                                                                                                                                                                                                                                                      | Not needed, as the log Pow is < 3 (2.8).                   |                        |                         |
|                                                                                                      | The available studies have shortcomings and their suitability to assess the relevance of residues in animal commodities is pending finalisation of the assessment of residues in feed items and the dietary burden.<br>Studies with [REDACTED]<br>[REDACTED]<br>Study not triggered for poultry from representative uses. |                                                            |                        |                         |
| Time needed to reach a plateau concentration in milk and eggs (days)                                 | Eggs: Yolk: 5 days; White: 3 days<br>Whole milk (goat): within the 4 days                                                                                                                                                                                                                                                 |                                                            |                        |                         |
| Animal residue definition for monitoring (RD-Mo)<br><b>OECD Guidance, series on pesticides No 31</b> | Pending                                                                                                                                                                                                                                                                                                                   |                                                            |                        |                         |

|                                                       |                                 |
|-------------------------------------------------------|---------------------------------|
| Animal residue definition for risk assessment (RD-RA) | Pending                         |
| Conversion factor (monitoring to risk assessment)     | Pending                         |
| Metabolism in rat and ruminant similar (Yes/No)       | Yes (provisonal)                |
| Fat soluble residues (Yes/No)<br>(FAO, 2009)          | No, (log P <sub>ow</sub> : 2.8) |

### Residues in succeeding crops (Regulation (EU) N° 283/2013, Annex Part A, point 6.6.2)

|                                                                                                      |                                                                                                     |
|------------------------------------------------------------------------------------------------------|-----------------------------------------------------------------------------------------------------|
| <b>Confined rotational crop study</b><br>(Quantitative aspect)<br><a href="#">OECD Guideline 502</a> | Not required as phosmet DT <sub>90</sub> <100 days and relevant metabolites in soil were not found. |
| <b>Field rotational crop study</b><br><a href="#">OECD Guideline 504</a>                             | Not triggered.                                                                                      |

### Stability of residues (Regulation (EU) N° 283/2013, Annex Part A, point 6.1)

#### [OECD Guideline 506](#)

| Plant products (Category) | Commodity                    | T (°C)  | Stability (months) |              |             |
|---------------------------|------------------------------|---------|--------------------|--------------|-------------|
|                           |                              |         | Phosmet            | Phosmet-oxon | Phthalimide |
| High water content        | Fruiting vegetables (pepper) | -20°C   | 30                 | -            | -           |
|                           | Pome fruit (apples)          | ≤ -18°C | 41                 | 39           | 13          |
|                           | Stone fruit (peaches)        | -20°C   | 28                 | 6            | -           |
| High oil content          | Oilseeds (soybean)           | -20°C   | 41                 | -            | -           |
|                           | Oilseeds (rape seeds)        | ≤ -18°C | 12                 | 12           | -           |
|                           | Tree nuts (almonds)          | -20°C   | 41                 | -            | -           |
| High starch content       | Starchy roots (potatoes)     | ≤ -18°C | 30                 | 12           | 12          |
|                           | Cereal grain (wheat)         | -20°C   | 30                 | -            | -           |
| High acid content         | Citrus fruit (unspecified)   | ≤ -18°C | 12                 | 6            | 12          |
|                           | Citrus fruit (orange)        | - 20°C  | 30                 | -            | -           |
| Others                    | Alfalfa (hay)                | -20°C   | 30                 | -            | -           |
|                           | Wheat (straw)                | -20°C   | 30                 | -            | -           |
|                           | Corn (ears)                  | -20°C   | 30                 | -            | -           |
| Processed commodities     | Apple juice                  | -20°C   | 39                 | 39           | -           |
|                           | Apple dry pomace             | -20°C   | 39                 | 39           | -           |
|                           | Apple sauce                  | -20°C   | 28                 | 28           | -           |
|                           | Canned peaches               | -20°C   | 12                 | 28           | -           |

|                                                                                                                                                                            | Dried peaches    | -20°C  | 1 | 1 | - |
|----------------------------------------------------------------------------------------------------------------------------------------------------------------------------|------------------|--------|---|---|---|
| Further studies with incurred residues in grape and grape products, and in pea hay could not be used as the study information is not compliant with OECD 506 requirements. |                  |        |   |   |   |
| Animal                                                                                                                                                                     | Animal commodity | T (°C) |   |   |   |
|                                                                                                                                                                            |                  |        |   |   |   |
| -                                                                                                                                                                          | Muscle           | -      | - | - | - |
| -                                                                                                                                                                          | Liver            | -      | - | - | - |
| -                                                                                                                                                                          | Kidney           | -      | - | - | - |
| -                                                                                                                                                                          | Milk             | -      | - | - | - |
| -                                                                                                                                                                          | Egg              | -      | - | - | - |

**Summary of residues data from the supervised residue trials (Regulation (EU) N° 283/2013, Annex Part A, point 6.3) OECD Guideline 509, OECD Guidance, series on pesticides No 66 and OECD MRL calculator**

| Crop                                                                                                   | Region/<br>Indoor<br>(a) | Residue levels (mg/kg) observed in the supervised residue trials relevant to the supported GAPs<br>(b) | Recommendations/comments<br>(OECD calculations)                                                                                                                                                                                                                                                  | MRL<br>proposals<br>(mg/kg) | HR<br>(mg/kg)<br>(c) | STMR<br>(mg/kg)<br>(d) |
|--------------------------------------------------------------------------------------------------------|--------------------------|--------------------------------------------------------------------------------------------------------|--------------------------------------------------------------------------------------------------------------------------------------------------------------------------------------------------------------------------------------------------------------------------------------------------|-----------------------------|----------------------|------------------------|
| <b>Representative uses</b>                                                                             |                          |                                                                                                        |                                                                                                                                                                                                                                                                                                  |                             |                      |                        |
| <b>Residue definition for monitoring/enforcement (Mo): Phosmet</b>                                     |                          |                                                                                                        |                                                                                                                                                                                                                                                                                                  |                             |                      |                        |
| <b>Residue definition for risk assessment (RA): Phosmet, phosmet oxon, phthalic acid (provisional)</b> |                          |                                                                                                        |                                                                                                                                                                                                                                                                                                  |                             |                      |                        |
| <b>Residue definition in accordance with RD-Mo</b>                                                     |                          |                                                                                                        |                                                                                                                                                                                                                                                                                                  |                             |                      |                        |
| Citrus                                                                                                 | SEU                      | <i>Oranges (whole fruit):</i><br>0.05, 0.06, 0.10, 0.12, 0.13 (x2), 0.14, 0.17, 0.20, 0.22             | The calculated MRL from available dataset is 0.4 mg/kg.<br>████████████████████<br>████████████████████<br>████████████████████<br>Due to missing trials additional in mandarins, dataset insufficient to support the representative use in citrus with extrapolation to the entire crops group. | ████                        | █                    | █                      |
|                                                                                                        |                          | <i>Mandarins (whole fruit):</i><br>0.24, 0.34                                                          | Only two independent trials were available. Dataset insufficient to support the representative use in citrus with extrapolation to the entire crops group ( <b>data gap</b> for additional trials according to guideline applicable at the time of application)                                  | none                        | -                    | -                      |
| Pome fruit                                                                                             | SEU                      | <i>Apples:</i><br>0.05, 0.09, 0.11, 0.14, 0.25                                                         | Only five independent trials were available ( <b>data gap</b> for additional trials); the tentatively calculated MRL based on the incomplete dataset is 0.5 mg/kg.                                                                                                                               | none                        | -                    | -                      |



| Crop                                                             | Region/<br>Indoor<br>(a) | Residue levels (mg/kg) observed in the supervised residue trials relevant to the supported GAPs<br>(b)                                                                                                                                                                                                                                         | Recommendations/comments<br>(OECD calculations)                                                                                                                                                                      | MRL proposals<br>(mg/kg) | HR<br>(mg/kg)<br>(c) | STMR<br>(mg/kg)<br>(d) |
|------------------------------------------------------------------|--------------------------|------------------------------------------------------------------------------------------------------------------------------------------------------------------------------------------------------------------------------------------------------------------------------------------------------------------------------------------------|----------------------------------------------------------------------------------------------------------------------------------------------------------------------------------------------------------------------|--------------------------|----------------------|------------------------|
|                                                                  |                          |                                                                                                                                                                                                                                                                                                                                                | The provisional RA identified an acute consumer risk and an MRL was not proposed.                                                                                                                                    |                          |                      |                        |
| Pome fruit                                                       | NEU                      | <i>Apples:</i><br>0.01*, 0.01, 0.02, 0.07, 0.08*(2x), 0.08, 0.24                                                                                                                                                                                                                                                                               | The calculated MRL from available dataset is 0.4 mg/kg.<br>████████████████████<br>████████████████████<br>████████████████████                                                                                      | ████                     | █                    | █                      |
| Peaches<br>(including<br>nectarines)                             | SEU                      | 0.07, 0.14, 0.15, 0.25, 0.37, 0.48, 0.54, 0.68                                                                                                                                                                                                                                                                                                 | The calculated MRL from available dataset is 1.5 mg/kg.<br>████████████████████<br>████████████████████<br>████████████████████                                                                                      | ████                     | █                    | █                      |
| Potato                                                           | NEU                      | < 0.01 (6x)                                                                                                                                                                                                                                                                                                                                    | The OECD calculated MRL from available dataset is 0.01* mg/kg.<br>████████████████████<br>████████████████████<br>████████████████████                                                                               | ████                     | █                    | █                      |
| <b>Residue definition in accordance with RD-RA (provisional)</b> |                          |                                                                                                                                                                                                                                                                                                                                                |                                                                                                                                                                                                                      |                          |                      |                        |
| Oranges                                                          | SEU                      | <i>Peel</i> <ul style="list-style-type: none"> <li>Phosmet: 0.15, 0.22, 0.36, 0.39, 0.51, 0.54, 0.62, 0.76, 1.15, 1.47</li> <li>Phosmet-oxon:&lt; 0.01 (10x)</li> <li>Sum of Phosmet and Phosmet-oxon, expressed as Phosmet<sup>(e)</sup>: 0.16, 0.23, 0.37, 0.40, 0.52, 0.55, 0.63, 0.77, 1.16, 1.48</li> <li>████████████████████</li> </ul> | <b>Data gap</b> to address ██████████<br>██████████<br>Due to missing additional trials in mandarins, dataset insufficient to support the representative use in citrus with extrapolation to the entire crops group. | █                        | 1.48 <sup>(e)</sup>  | 0.54 <sup>(e)</sup>    |

| Crop      | Region/<br>Indoor<br>(a) | Residue levels (mg/kg) observed in the supervised residue trials relevant to the supported GAPs<br>(b)                                                                                                                                                                                                                  | Recommendations/comments<br>(OECD calculations)                                                                                                                                                                                                                                                                         | MRL proposals<br>(mg/kg) | HR<br>(mg/kg)<br>(c) | STMR<br>(mg/kg)<br>(d) |
|-----------|--------------------------|-------------------------------------------------------------------------------------------------------------------------------------------------------------------------------------------------------------------------------------------------------------------------------------------------------------------------|-------------------------------------------------------------------------------------------------------------------------------------------------------------------------------------------------------------------------------------------------------------------------------------------------------------------------|--------------------------|----------------------|------------------------|
|           |                          | <i>Pulp</i> <ul style="list-style-type: none"> <li>Phosmet: &lt; 0.01 (5x), 0.01, 0.02 (3x), 0.03, 0.04 mg/kg</li> <li>Phosmet-oxon: &lt; 0.01 (16x)</li> <li>Sum of Phosmet and Phosmet-oxon, expressed as Phosmet<sup>(e)</sup>: &lt; 0.02 (5x), 0.02, 0.03 (3x), 0.04, 0.05</li> <li>████████████████████</li> </ul> | <b>Data gap</b> to address ██████████<br>Due to missing additional trials in mandarins, dataset insufficient to support the representative use in citrus with extrapolation to the entire crops group.                                                                                                                  | █                        | 0.05 <sup>(e)</sup>  | 0.02 <sup>(e)</sup>    |
| Mandarins | SEU                      | <i>Peel</i> <ul style="list-style-type: none"> <li>Phosmet: 1.15, 1.48</li> <li>Phosmet oxon: &lt;0.01(2x)</li> <li>Sum of Phosmet and Phosmet-oxon, expressed as Phosmet<sup>(e)</sup>: 1.16, 1.49</li> <li>████████████████████</li> </ul>                                                                            | Only two independent trials were available. Dataset insufficient to support the representative use in citrus with extrapolation to the entire crops group ( <b>data gap</b> for additional trials according to guideline applicable at the time of application)<br><b>Data gap</b> to address ██████████<br>██████████. | █                        | 1.49 <sup>(e)</sup>  | 1.32 <sup>(e)</sup>    |
|           |                          | <i>Pulp</i> <ul style="list-style-type: none"> <li>Phosmet : 0.01 (2x)</li> <li>Phosmet oxon: &lt;0.01 (2x)</li> <li>Sum of Phosmet and Phosmet-oxon, expressed as Phosmet<sup>(e)</sup>: 0.02 (2x)</li> <li>████████████████████</li> </ul>                                                                            | Only two independent trials were available. Dataset insufficient to support the representative use in citrus with extrapolation to the entire crops group ( <b>data gap</b> for additional trials according to guideline applicable at the time of application)<br><b>Data gap</b> to address ██████████<br>██████████. | █                        | 0.02 <sup>(e)</sup>  | 0.02 <sup>(e)</sup>    |
| Apples    | SEU                      | <ul style="list-style-type: none"> <li>Phosmet: 0.05, 0.09, 0.11, 0.14, 0.25</li> <li>Phosmet-oxon: &lt;0.01 (4x), 0.01</li> </ul>                                                                                                                                                                                      | Only five independent trials were available ( <b>data gap</b> for additional trials)                                                                                                                                                                                                                                    | █                        | 0.26 <sup>(e)</sup>  | 0.12 <sup>(e)</sup>    |

| Crop                                                                                                                    | Region/<br>Indoor<br>(a) | Residue levels (mg/kg) observed in the supervised residue trials relevant to the supported GAPs<br>(b)                                                                                                                                                                                            | Recommendations/comments<br>(OECD calculations)                                                                                                                                         | MRL proposals<br>(mg/kg) | HR<br>(mg/kg)<br>(c)   | STMR<br>(mg/kg)<br>(d) |
|-------------------------------------------------------------------------------------------------------------------------|--------------------------|---------------------------------------------------------------------------------------------------------------------------------------------------------------------------------------------------------------------------------------------------------------------------------------------------|-----------------------------------------------------------------------------------------------------------------------------------------------------------------------------------------|--------------------------|------------------------|------------------------|
|                                                                                                                         |                          | <ul style="list-style-type: none"> <li>Sum of Phosmet and Phosmet-oxon, expressed as Phosmet<sup>(e)</sup>: 0.06, 0.10, 0.12, 0.15, 0.26</li> <li>██████████</li> </ul>                                                                                                                           | Data gap to address ██████████                                                                                                                                                          |                          |                        |                        |
|                                                                                                                         | NEU                      | <ul style="list-style-type: none"> <li>Phosmet: 0.01*, 0.01, 0.02, 0.07, 0.08*, (2x) 0.08, 0.24</li> <li>Phosmet-oxon &lt; 0.01 (8x)</li> <li>Sum of Phosmet and Phosmet-oxon, expressed as Phosmet<sup>(e)</sup>: 0.02*, 0.02, 0.03, 0.08, 0.09*, (2x) 0.09, 0.25</li> <li>██████████</li> </ul> | Extrapolation to entire group of Pome fruit.<br>Data gap to address ██████████                                                                                                          | █                        | 0.25 <sup>(e)</sup>    | 0.09 <sup>(e)</sup>    |
| Potatoes                                                                                                                | NEU                      | <ul style="list-style-type: none"> <li>Phosmet: &lt; 0.01 (6x)</li> <li>Phosmet-oxon: &lt; 0.01 (6x)</li> <li>Sum of Phosmet and Phosmet-oxon, expressed as Phosmet<sup>(e)</sup>: &lt; 0.02 (6x)</li> <li>██████████</li> </ul>                                                                  | Data gap to address ██████████                                                                                                                                                          | █                        | 0.02 <sup>(e)</sup>    | 0.02 <sup>(e)</sup>    |
| Peaches<br>(include<br>nectarines)                                                                                      | SEU                      | <ul style="list-style-type: none"> <li>Phosmet: 0.07, 0.14, 0.15, 0.25, 0.37, 0.48, 0.54, 0.68</li> <li>Phosmet-oxon: &lt; 0.01 (4x) (data gap)</li> <li>Sum of Phosmet and Phosmet-oxon, expressed as Phosmet<sup>(e)</sup>: 0.15, 0.26, 0.38, 0.49</li> <li>██████████</li> </ul>               | Only four trials were available for with analysis of phosmet-oxon within a period of demonstrated storage stability (data gap for additional trials).<br>Data gap to address ██████████ | █                        | 0.68 <sup>(e)(f)</sup> | 0.32 <sup>(e)</sup>    |
| <b>Summary of the data on formulation equivalence – not applicable</b>                                                  |                          |                                                                                                                                                                                                                                                                                                   |                                                                                                                                                                                         |                          |                        |                        |
| <b>Summary of data on residues in pollen and bee products</b> (Regulation (EU) No 283/2013, Annex Part A, point 6.10.1) |                          |                                                                                                                                                                                                                                                                                                   |                                                                                                                                                                                         |                          |                        |                        |
| Product(s)                                                                                                              | Region                   | Residue data (mg/kg)                                                                                                                                                                                                                                                                              | Recommendations/comments                                                                                                                                                                | -                        |                        |                        |
| <b>Data gap</b>                                                                                                         |                          |                                                                                                                                                                                                                                                                                                   |                                                                                                                                                                                         |                          |                        |                        |

(a): NEU or SEU for northern or southern outdoor trials in EU member states (N+SEU if both zones), Indoor for glasshouse/protected crops, Country if non-EU location.

(b): Residue levels in trials conducted according to GAP reported in ascending order (e.g. 3x <0.01, 0.01, 6x 0.02, 0.04, 0.08, 3x 0.10, 2x 0.15, 0.17). When residue definition for monitoring and risk assessment differs, use Mo/RA to differentiate data expressed according to the residue definition for Monitoring and Risk Assessment.

(c): HR: Highest residue. When residue definition for monitoring and risk assessment differs, HR according to residue definition for monitoring reported in brackets (HR<sub>M0</sub>).

- (d): **STMR**: Supervised Trials Median Residue. When residue definition for monitoring and risk assessment differs, STMR according to definition for monitoring reported in brackets (STMR<sub>M0</sub>).
- (e): Provisional, used to provide best estimates for consumer risk assessment with the information available
- (f): Phosmet only

### Inputs for animal burden calculations.

**Note:** Calculation only for phosmet + phosmet oxon, ██████████ not considered. The calculation is provisional pending the ██████████ and processed commodities, completed residue trial datasets and processing trials (see summary of residues data and processing factors).

| Feed commodity       | Median dietary burden |                         | Maximum dietary burden |                         |
|----------------------|-----------------------|-------------------------|------------------------|-------------------------|
|                      | (mg/kg)               | Comment                 | (mg/kg)                | Comment                 |
| <b>Root crop</b>     |                       |                         |                        |                         |
| Potato culls         | 0.02                  | STMR (LOQ)              | 0.02                   | HR (LOQ)                |
| <b>By-product</b>    |                       |                         |                        |                         |
| Apple wet pomace     | 0.32                  | STMR (0.12) x PF (2.70) | 0.32                   | STMR (0.12) x PF (2.70) |
| Citrus dried pulp    | 0.18                  | STMR (0.14) x PF (1.32) | 0.18                   | STMR (0.14) x PF (1.32) |
| Potato process waste | 0.02                  | STMR-P (LOQ)            | 0.02                   | STMR-P (LOQ)            |
| Potato dried pulp    | 0.02                  | STMR-P (LOQ)            | 0.02                   | STMR-P (LOQ)            |

PF: Processing factor

LOQ: Limit of quantification; 0.01 mg/kg for Phosmet and Phosmet-oxon, respectively

**Residues from livestock feeding studies (Regulation (EU) N° 283/2013, Annex Part A, points 6.4.1, 6.4.2, 6.4.3 and 6.4.4)**

**Note:** The calculation is provisional pending the finalisation of RA-RD in plant and processed commodities, completed residue trial datasets and processing trials (see summary of residues data and processing factors).

| MRL calculations                                                                       | Ruminant                                                              |                      |                                   |                      | Pig/Swine                         |                        | Poultry                           |                       | Fish                              |                      |
|----------------------------------------------------------------------------------------|-----------------------------------------------------------------------|----------------------|-----------------------------------|----------------------|-----------------------------------|------------------------|-----------------------------------|-----------------------|-----------------------------------|----------------------|
|                                                                                        | <b>Highest expected intake</b><br>(mg/kg bw/d)<br>(mg/kg DM for fish) | Cattle Beef          | 0.005                             | Ram/Ewe              | 0.004                             | Breeding               | 0.002                             | Broiler               | 0.001                             | Carp                 |
|                                                                                        | Cattle Dairy                                                          | 0.004                | Lamb                              | 0.004                | Finishing                         | 0.002                  | Layer                             | 0.001                 | Trout                             | Not required         |
|                                                                                        |                                                                       |                      |                                   |                      |                                   |                        | Turkey                            | 0.001                 | Fish intake >0.1 mg/kg DM         |                      |
| Intake >0.004 mg/kg bw                                                                 | YES                                                                   |                      | YES                               |                      | NO                                |                        | NO                                |                       | Not applicable                    |                      |
| Feeding study submitted                                                                | No feeding study available.                                           |                      |                                   |                      |                                   |                        |                                   |                       |                                   |                      |
| <b>Representative feeding level</b> (mg/kg bw/d, mg/kg DM for fish) and <b>N rates</b> | Level                                                                 | Beef: N<br>Dairy: N  | Level                             | Lamb: N<br>Ewe: N    | Level                             | N rate<br>Breed/Finish | Level                             | B or T: N<br>Layer: N | Level                             | N rate<br>Carp/Trout |
|                                                                                        | Estimated HR <sup>(a)</sup> at 1N                                     | <b>MRL</b> proposals | Estimated HR <sup>(a)</sup> at 1N | <b>MRL</b> proposals | Estimated HR <sup>(a)</sup> at 1N | <b>MRL</b> proposals   | Estimated HR <sup>(a)</sup> at 1N | <b>MRL</b> proposals  | Estimated HR <sup>(a)</sup> at 1N | <b>MRL</b> proposals |
| Muscle                                                                                 |                                                                       |                      |                                   |                      |                                   |                        |                                   |                       |                                   |                      |
| Fat                                                                                    |                                                                       |                      |                                   |                      |                                   |                        |                                   |                       |                                   |                      |
| Meat <sup>(b)</sup>                                                                    |                                                                       |                      |                                   |                      |                                   |                        |                                   |                       |                                   |                      |
| Liver                                                                                  |                                                                       |                      |                                   |                      |                                   |                        |                                   |                       |                                   |                      |
| Kidney                                                                                 |                                                                       |                      |                                   |                      |                                   |                        |                                   |                       |                                   |                      |
| Milk <sup>(a)</sup>                                                                    |                                                                       |                      |                                   |                      |                                   |                        |                                   |                       |                                   |                      |
| Eggs                                                                                   |                                                                       |                      |                                   |                      |                                   |                        |                                   |                       |                                   |                      |
| Method of calculation <sup>(c)</sup>                                                   |                                                                       |                      |                                   |                      |                                   |                        |                                   |                       |                                   |                      |

<sup>(a)</sup>: Estimated HR calculated at 1N level (**estimated mean level for milk**).

<sup>(b)</sup>: HR in meat calculated for mammalian on the basis of 20% fat + 80% muscle and 10% fat + 90% muscle for poultry

<sup>(c)</sup>: The OECD guidance document on residues in livestock (series on pesticides 73) recommends three different approaches to derive MRLs for animal products; by applying a transfer factor (Tf), by intrapolation (It) or by linear regression (Ln). Fill in method(s) considered to derive the MRL proposals.

| STMR calculations                                                                      | Ruminant                                                             |                                            |                             |                                            | Pig/Swine                   |                                            | Poultry                     |                                            | Fish                        |                                            |
|----------------------------------------------------------------------------------------|----------------------------------------------------------------------|--------------------------------------------|-----------------------------|--------------------------------------------|-----------------------------|--------------------------------------------|-----------------------------|--------------------------------------------|-----------------------------|--------------------------------------------|
|                                                                                        | <b>Median expected intake</b><br>(mg/kg bw/d)<br>(mg/kg DM for fish) | Beef cattle                                |                             | Ram/Ewe                                    |                             | Breeding                                   |                             | Broiler                                    |                             | Carp                                       |
|                                                                                        | Dairy cattle                                                         |                                            | Lamb                        |                                            | Finishing                   |                                            | Layer                       |                                            | Trout                       | Not required                               |
|                                                                                        |                                                                      |                                            |                             |                                            |                             |                                            | Turkey                      |                                            |                             |                                            |
| <b>Representative feeding level</b> (mg/kg bw/d, mg/kg DM for fish) and <b>N rates</b> | Level                                                                | Beef:<br>Dairy:                            | Level                       | Lamb :<br>Ewe:                             | Level                       | N rate<br>Breed/Finish                     | Level                       | B or T:<br>Layer:                          | Level                       | N rate<br>Carp/Trout                       |
|                                                                                        | Mean level in feeding level                                          | Estimated <b>STMR</b> <sup>(b)</sup> at 1N | Mean level in feeding level | Estimated <b>STMR</b> <sup>(b)</sup> at 1N | Mean level in feeding level | Estimated <b>STMR</b> <sup>(b)</sup> at 1N | Mean level in feeding level | Estimated <b>STMR</b> <sup>(b)</sup> at 1N | Mean level in feeding level | Estimated <b>STMR</b> <sup>(b)</sup> at 1N |
| Muscle                                                                                 |                                                                      |                                            |                             |                                            |                             |                                            |                             |                                            |                             |                                            |
| Fat                                                                                    |                                                                      |                                            |                             |                                            |                             |                                            |                             |                                            |                             |                                            |
| Meat <sup>(a)</sup>                                                                    |                                                                      |                                            |                             |                                            |                             |                                            |                             |                                            |                             |                                            |
| Liver                                                                                  |                                                                      |                                            |                             |                                            |                             |                                            |                             |                                            |                             |                                            |
| Kidney                                                                                 |                                                                      |                                            |                             |                                            |                             |                                            |                             |                                            |                             |                                            |
| Milk                                                                                   |                                                                      |                                            |                             |                                            |                             |                                            |                             |                                            |                             |                                            |
| Eggs                                                                                   |                                                                      |                                            |                             |                                            |                             |                                            |                             |                                            |                             |                                            |
| Method of calculation <sup>(c)</sup>                                                   |                                                                      |                                            |                             |                                            |                             |                                            |                             |                                            |                             |                                            |

<sup>(a)</sup>: STMR in meat calculated for mammalian on the basis of 20% fat + 80% muscle and 10% fat + 90% muscle for poultry

<sup>(b)</sup>: When the mean level is set at the LOQ, the STMR is set at the LOQ.

<sup>(c)</sup>: The OECD guidance document on residues in livestock (series on pesticide 73) recommends three different approaches to derive MRLs for animal products; by applying a transfer factor (Tf), by intrapolation (It) or by linear regression (Ln). Fill in method(s) considered to derive the MRL proposals.

**Processing factors (Regulation (EU) N° 283/2013, Annex Part A, points 6.5.2 and 6.5.3)**  
**OECD Guideline 508 and OECD Guidance, series on testing and assessment No 96**

**Note:** Provisional, based on calculated sum of Phosmet and Phosmet-oxon, expressed as Phosmet

| Crop (RAC)/Edible part or Crop (RAC)/Processed product                      | Number of studies <sup>(a)</sup> | Processing Factor (PF)                                                   |           | Conversion Factor (CF <sub>P</sub> ) for RA <sup>(b)</sup> |
|-----------------------------------------------------------------------------|----------------------------------|--------------------------------------------------------------------------|-----------|------------------------------------------------------------|
|                                                                             |                                  | Individual values                                                        | Median PF |                                                            |
| <b>Representative uses (row to be deleted if not relevant)</b>              |                                  |                                                                          |           |                                                            |
| <b>CITRUS</b>                                                               |                                  |                                                                          |           |                                                            |
| <b>Marmalade processing</b>                                                 |                                  |                                                                          |           |                                                            |
| Marmalade                                                                   | 4                                | 0.08, 0.09, 0.29, 0.31                                                   | 0.19      | (d)                                                        |
| <b>Canned orange processing</b>                                             |                                  |                                                                          |           |                                                            |
| Fruit stock                                                                 | 4                                | 0.04, 0.05, 0.15 (2x)                                                    | 0.10      | (d)                                                        |
| Canned oranges                                                              | 4                                | 0.05, 0.07, 0.08, 0.15 (2x), 0.16                                        | 0.11      | (d)                                                        |
| <b>Orange juice processing</b>                                              |                                  |                                                                          |           |                                                            |
| Orange juice                                                                | 4                                | 0.09, 0.14, 0.15 (2x)                                                    | 0.15      | (d)                                                        |
| <b>By-products (derived from orange juice, canned and purée processing)</b> |                                  |                                                                          |           |                                                            |
| Wet pomace <sup>(c)</sup>                                                   | 1                                | 0.35                                                                     | n/a       | (d)                                                        |
| Dry pomace <sup>(c)</sup>                                                   | 1                                | 1.32                                                                     | n/a       | (d)                                                        |
| <b>APPLES</b>                                                               |                                  |                                                                          |           |                                                            |
| <b>Apple juice processing</b>                                               |                                  |                                                                          |           |                                                            |
| Apple juice (unclarified juice after pasteurisation)                        | 3                                | 0.15, 0.16, 0.19                                                         | 0.16      | (d)                                                        |
| Apple juice (clarified juice after pasteurisation)                          | 6                                | 0.05, 0.08, 0.10, 0.13 (2), 0.19                                         | 0.12      | (d)                                                        |
| <b>Canned apple processing</b>                                              |                                  |                                                                          |           |                                                            |
| Canned apples                                                               | 6                                | 0.02 (3), 0.03 (2), 0.04                                                 | 0.03      | (d)                                                        |
| <b>Apple purée processing</b>                                               |                                  |                                                                          |           |                                                            |
| Apple purée                                                                 | 6                                | 0.02, 0.03, 0.04, 0.34, 0.61, 0.66                                       | 0.19      | (d)                                                        |
| <b>Drying</b>                                                               |                                  |                                                                          |           |                                                            |
| Dried apples                                                                | 3                                | 3.96, 4.30, 8.18                                                         | 4.30      | (d)                                                        |
| <b>By-products (derived from apple juice, canned and purée processing)</b>  |                                  |                                                                          |           |                                                            |
| Wet pomace                                                                  | 6                                | 0.43, 1.08, 2.17, 3.22, 3.81, 4.45                                       | 2.70      | (d)                                                        |
| Dry pomace                                                                  | 12                               | 1.89, 3.03, 3.66, 4.26, 4.58, 4.85, 5.43, 8.06, 8.81, 9.19, 12.01, 19.08 | 5.14      | (d)                                                        |

<sup>(a)</sup>: Studies with residues in the RAC at or close to the LOQ should be disregarded (unless concentration)

<sup>(b)</sup>: When the residue definition for risk assessment differs from the residue definition for monitoring

<sup>(c)</sup>: At least two processing tests are needed to derive a PF (OECD 508)

<sup>(d)</sup>: Pending finalisation of RD-RA for plant and processed commodities.

**Consumer risk assessment (Regulation (EU) N° 283/2013, Annex Part A, point 6.9)**

**Note:** Provisional, pending numerous identified data gaps and provisionally applying the TRVs of phosmet to phosmet oxon.

ADI

TMDI according to EFSA PRIMo

NTMDI, according to (to be specified)

IEDI (% ADI), according to EFSA PRIMo

|                             |
|-----------------------------|
| █ mg/kg bw per day          |
| █                           |
| Not applicable.             |
| PRIMO rev. 2 (highest two): |
| █ of ADI (DE, child)        |



|                                              |                                                                                                                                                                                                                                                                                                                                                       |
|----------------------------------------------|-------------------------------------------------------------------------------------------------------------------------------------------------------------------------------------------------------------------------------------------------------------------------------------------------------------------------------------------------------|
|                                              | <p>█ of ADI (NL, child)</p> <p>PRIMO rev. 3 (highest two):</p> <p>█ of ADI (NL, Toddler)</p> <p>█ % of ADI (DE child)</p>                                                                                                                                                                                                                             |
| NEDI (% ADI), according to (to be specified) | Not required.                                                                                                                                                                                                                                                                                                                                         |
| Factors included in the calculations         | None                                                                                                                                                                                                                                                                                                                                                  |
| <b>ARfD</b>                                  | █ mg/kg bw                                                                                                                                                                                                                                                                                                                                            |
| IESTI (% ARfD), according to EFSA PRIMo      | <p>PRIMO rev. 2.1:</p> <p>█ % (peaches)</p> <p>█ % (apples)</p> <p>█ % (pears)</p> <p>█ % (oranges, pulp)</p> <p>█ % (quinces)</p> <p>█ % (medlar)</p> <p>█ % (potatos)</p> <p>PRIMO rev. 3:</p> <p>█ % (peaches)</p> <p>█ % (pears)</p> <p>█ % (apples)</p> <p>█ % (oranges, pulp)</p> <p>█ % (quinces)</p> <p>█ % (medlar)</p> <p>█ % (potatos)</p> |
| NESTI (% ARfD), according to EFSA PRIMo      | Not required.                                                                                                                                                                                                                                                                                                                                         |
| Factors included in IESTI and NESTI          | None                                                                                                                                                                                                                                                                                                                                                  |

### Proposed MRLs (Regulation (EU) No 283/2013, Annex Part A, points 6.7.2 and 6.7.3)

| Code <sup>(a)</sup>        | Commodity/Group    | MRL/Import tolerance <sup>(b)</sup> (mg/kg) and Comments |
|----------------------------|--------------------|----------------------------------------------------------|
| <b>Plant commodities</b>   |                    |                                                          |
| <b>Representative uses</b> |                    |                                                          |
| 0110000                    | Citrus fruit       | █                                                        |
| 0130000                    | Pome fruit         | █                                                        |
| 0140030                    | Peaches/Nectarines | █                                                        |
| 0211000                    | Potatoes           | █                                                        |
| <b>Animal commodities</b>  |                    |                                                          |
| -                          | -                  | -                                                        |
| █ for animal commodities   |                    |                                                          |

(a): Commodity code number, as listed in Annex I of Regulation (EC) No 396/2005

(b): MRLs proposed at the LOQ, should be annotated by an asterisk (\*) after the figure.



## Environmental fate and behaviour

### Route of degradation (aerobic) in soil (Regulation (EU) N° 283/2013, Annex Part A, point 7.1.1.1)

|                                                                                                     |                                                                                                                                                                                                                          |
|-----------------------------------------------------------------------------------------------------|--------------------------------------------------------------------------------------------------------------------------------------------------------------------------------------------------------------------------|
| Mineralisation after 100 days                                                                       | 52.1-77.2 % after 120 d, [ <sup>14</sup> C-carbonyl]-label (n= 3)<br>13.96 % after 6 d, [ <sup>14</sup> C- methylene]-label (n= 1)<br><i>Sterilized:</i><br>0.08-0.12 at 120 d [ <sup>14</sup> C- carbonyl]-label (n= 1) |
| Non-extractable residues after 100 days                                                             | 37.9 % after 120 d, [ <sup>14</sup> C-carbonyl]-label (n= 1)<br>16.3 % after 6 d, [ <sup>14</sup> C- methylene]-label (n= 1)<br><i>Sterilized:</i><br>16.68 at 120 d [ <sup>14</sup> C- carbonyl]-label (n= 1)           |
| Metabolites requiring further consideration<br>- name and/or code, % of applied (range and maximum) | None                                                                                                                                                                                                                     |

### Route of degradation (anaerobic) in soil (Regulation (EU) N° 283/2013, Annex Part A, point 7.1.1.2)

|                                                                                                                                |                                                                                                                                                                                                                                                                                                                                                                                                                                                                  |
|--------------------------------------------------------------------------------------------------------------------------------|------------------------------------------------------------------------------------------------------------------------------------------------------------------------------------------------------------------------------------------------------------------------------------------------------------------------------------------------------------------------------------------------------------------------------------------------------------------|
| Mineralisation after 100 days                                                                                                  | 24.4 % after 125 d, [ <sup>14</sup> C- carbonyl]-label (n= 1)                                                                                                                                                                                                                                                                                                                                                                                                    |
| Non-extractable residues after 100 days                                                                                        | 48.2 % after 150 d, [ <sup>14</sup> C- carbonyl]-label (n= 1)                                                                                                                                                                                                                                                                                                                                                                                                    |
| Metabolites that may require further consideration<br>for risk assessment - name and/or code, % of applied (range and maximum) | Anaerobic degradation is not relevant according to GAP. Thus, further consideration of desmethyl phosmet and phthalamic acid metabolites is not required for the representative uses evaluated.<br><i>Phthalamic acid:</i><br>16.9% at 30 d, [ <sup>14</sup> C-carbonyl]-label (n=1).<br><i>Phthalic acid:</i><br>8.3 % at 125 d [ <sup>14</sup> C-carbonyl]-label (n=1).<br><i>Desmethyl phosmet:</i><br>10.8 % at 5 d [ <sup>14</sup> C-carbonyl]-label (n=1). |

### Route of degradation (photolysis) on soil (Regulation (EU) N° 283/2013, Annex Part A, point 7.1.1.3)

|                                                                                                                                |                                                                                                                       |
|--------------------------------------------------------------------------------------------------------------------------------|-----------------------------------------------------------------------------------------------------------------------|
| Metabolites that may require further consideration<br>for risk assessment - name and/or code, % of applied (range and maximum) | No novel metabolites present in irradiated samples compared to dark control. Thus further consideration not required. |
| Mineralisation at study end                                                                                                    | < 1 % after 30 d, [14C -carbonyl]-label (n= 1)                                                                        |
| Non-extractable residues at study end                                                                                          | < 51 % after 30 d, [14C -carbonyl]-label (n= 1)                                                                       |

**Rate of degradation in soil (aerobic) laboratory studies active substance (Regulation (EU) N° 283/2013, Annex Part A, point 7.1.2.1.1 and Regulation (EU) N° 284/2013, Annex Part A, point 9.1.1.1) – Persistence Endpoints**

| Phosmet                                   | Dark aerobic conditions |              |                                        |                  |                       |
|-------------------------------------------|-------------------------|--------------|----------------------------------------|------------------|-----------------------|
| Soil type                                 | pH <sup>a)</sup>        | t. °C / %MHC | DT <sub>50</sub> /DT <sub>90</sub> (d) | St. ( $\chi^2$ ) | Method of calculation |
| Loamy sand                                | 5.7                     | 20 / 50      | 4.59 / 22.45                           | 5.452            | FOMC                  |
| Sandy Loam                                | 7.6                     | 20 / 44      | 1.65 / 5.48                            | 4.811            | SFO                   |
| Silt Loam                                 | 6.2                     | 20 / 50      | 2.67 / 8.85                            | 7.780            | SFO                   |
| Persistence endpoints (worst-case values) |                         |              | 4.59 / 22.45 <sup>b)</sup>             |                  |                       |

<sup>a)</sup> Measured in KCl except loamy sand that was measured in water

**Rate of degradation in soil (aerobic) laboratory studies active substance (Regulation (EU) N° 283/2013, Annex Part A, point 7.1.2.1.1 and Regulation (EU) N° 284/2013, Annex Part A, point 9.1.1.1) – Modelling Endpoints**

| Phosmet            | Dark aerobic conditions |              |                      |                                                          |                  |                       |
|--------------------|-------------------------|--------------|----------------------|----------------------------------------------------------|------------------|-----------------------|
| Soil type          | pH <sup>a)</sup>        | t. °C / %MHC | DT <sub>50</sub> (d) | DT <sub>50</sub> (d)<br>20 °C<br>pF2/10kPa <sup>b)</sup> | St. ( $\chi^2$ ) | Method of calculation |
| Loamy sand         | 5.7                     | 20 / 50      | 5.01                 | 5.01                                                     | 6.805            | SFO                   |
| Sandy Loam         | 7.6                     | 20 / 44      | 1.65                 | 1.65                                                     | 4.811            | SFO                   |
| Silt Loam          | 6.2                     | 20 / 50      | 2.67                 | 2.67                                                     | 7.780            | SFO                   |
| Modelling endpoint |                         |              |                      | 5.01 <sup>d)</sup>                                       |                  |                       |
| pH dependence      |                         |              |                      | Possible but not demonstrated                            |                  |                       |

<sup>a)</sup> Measured in KCl except loamy sand that was measured in water

<sup>b)</sup> Normalised using a Q10 of 2.58 and Walker equation coefficient of 0.7

<sup>c)</sup> Moisture correction for normalisation is not adequate, as the moisture content was only indicated for the study start, whereas in the study report it is only generally stated that the soil was irrigated to ensure moist conditions throughout the incubation

<sup>d)</sup> Worst case taking into account that the study by Mc Bain has been considered not reliable at Pesticide Peer Review Meeting TC 03 (Experts' consultation point 4.3) and there are only three reliable soil kinetic data available. **Data gap** for one additional degradation in soil (aerobic) laboratory study to derive a fourth reliable DegT50 endpoint.

**Rate of degradation in soil (aerobic) laboratory studies transformation products (Regulation (EU) N° 283/2013, Annex Part A, point 7.1.2.1.2 and Regulation (EU) N° 284/2013, Annex Part A, point 9.1.1.1)**

| N-methoxymethyl phthalimide | Dark aerobic conditions Metabolite dosed or the precursor from which the f.f. was derived was xxx |                   |                                         |                                        |                                                          |                  |                          |  |
|-----------------------------|---------------------------------------------------------------------------------------------------|-------------------|-----------------------------------------|----------------------------------------|----------------------------------------------------------|------------------|--------------------------|--|
| Soil type                   | pH <sup>a)</sup>                                                                                  | t. °C / % MWHC    | DT <sub>50</sub> / DT <sub>90</sub> (d) | f. f. k <sub>f</sub> / k <sub>dp</sub> | DT <sub>50</sub> (d)<br>20 °C<br>pF2/10kPa <sup>b)</sup> | St. ( $\chi^2$ ) | Method of calculation    |  |
| Sand                        | 5.2                                                                                               | 20 ± 2 °C<br>pF 2 | 15.58/51.76                             | -                                      | 15.58                                                    | 6.9              | Applied as parent<br>SFO |  |
| Sandy clay loam             | 7.2                                                                                               | 20 ± 2 °C<br>pF 2 | 3.07/10.19                              | -                                      | 3.07                                                     | 8.6              | Applied as parent<br>SFO |  |

|                                          |  |     |                   |             |   |      |      |                       |
|------------------------------------------|--|-----|-------------------|-------------|---|------|------|-----------------------|
| Sand                                     |  | 4.6 | 20 ± 2 °C<br>pF 2 | 6.48/21.53  | - | 6.48 | 11.5 | Applied as parent SFO |
| Persistence Endpoints (worst case value) |  |     |                   | 15.58/51.76 |   |      |      |                       |
| Geometric mean (if not pH dependent)     |  |     |                   |             |   | 6.7  |      |                       |
| Arithmetic mean                          |  |     |                   |             | - |      |      |                       |
| pH dependence, <i>Yes or No</i>          |  |     |                   |             |   | No   |      |                       |

<sup>a)</sup> Measured in calcium chloride solution

<sup>b)</sup> Normalised using a Q10 of 2.58 and Walker equation coefficient of 0.7

| Phthalimide                              |                | Dark aerobic conditions Metabolite dosed or the precursor from which the f.f. was derived was .xxx |                   |                                            |                                          |                                                          |                          |                       |
|------------------------------------------|----------------|----------------------------------------------------------------------------------------------------|-------------------|--------------------------------------------|------------------------------------------|----------------------------------------------------------|--------------------------|-----------------------|
| Soil type                                | X <sup>7</sup> | pH <sup>a)</sup>                                                                                   | t. °C / %<br>MWHC | DT <sub>50</sub> / DT <sub>90</sub><br>(d) | f. f. k <sub>f</sub><br>/k <sub>dp</sub> | DT <sub>50</sub> (d)<br>20 °C<br>pF2/10kPa <sup>b)</sup> | St.<br>(χ <sup>2</sup> ) | Method of calculation |
| Sand                                     |                | 5.2                                                                                                | 20 ± 2 °C<br>pF 2 | 0.36/1.18                                  | -                                        | 0.36                                                     | 4.80                     | Applied as parent SFO |
| Sandy clay loam                          |                | 7.2                                                                                                | 20 ± 2 °C<br>pF 2 | 0.08/0.27                                  | -                                        | 0.08                                                     | 2.50                     | Applied as parent SFO |
| Sand                                     |                | 4.6                                                                                                | 20 ± 2 °C<br>pF 2 | 1.11/3.69                                  | -                                        | 1.11                                                     | 6.22                     | Applied as parent SFO |
| Persistence Endpoints (worst case value) |                |                                                                                                    |                   | 1.11/3.69                                  |                                          |                                                          |                          |                       |
| Geometric mean (if not pH dependent)     |                |                                                                                                    |                   |                                            |                                          | 0.32                                                     |                          |                       |
| Arithmetic mean                          |                |                                                                                                    |                   |                                            | -                                        |                                                          |                          |                       |
| pH dependence, <i>Yes or No</i>          |                |                                                                                                    |                   |                                            |                                          | No                                                       |                          |                       |

| Phthalamic acid                                           |                | Dark aerobic conditions Metabolite dosed or the precursor from which the f.f. was derived was .xxx |                   |                                            |                                          |                                                          |                          |                          |
|-----------------------------------------------------------|----------------|----------------------------------------------------------------------------------------------------|-------------------|--------------------------------------------|------------------------------------------|----------------------------------------------------------|--------------------------|--------------------------|
| Soil type                                                 | X <sup>7</sup> | pH <sup>a)</sup>                                                                                   | t. °C / %<br>MWHC | DT <sub>50</sub> / DT <sub>90</sub><br>(d) | f. f. k <sub>f</sub><br>/k <sub>dp</sub> | DT <sub>50</sub> (d)<br>20 °C<br>pF2/10kPa <sup>b)</sup> | St.<br>(χ <sup>2</sup> ) | Method of calculation    |
| Sand                                                      |                | 5.2                                                                                                | 20 ± 2 °C<br>pF 2 | 1.71/5.67                                  | 0.12                                     | 1.71                                                     | 23.76                    | From Phthalimide SFO-SFO |
| Sandy clay loam                                           |                | 7.2                                                                                                | 20 ± 2 °C<br>pF 2 | 0.40/1.34                                  | 1.00                                     | 0.40                                                     | 13.94                    | From Phthalimide SFO-SFO |
| Sand                                                      |                | 4.6                                                                                                | 20 ± 2 °C<br>pF 2 | 2.63/8.74                                  | 0.08                                     | 2.63                                                     | 30.11                    | From Phthalimide SFO-SFO |
| Persistence Endpoints (worst case value)                  |                |                                                                                                    |                   | 2.63/8.74                                  |                                          |                                                          |                          |                          |
| Modelling Endpoints (Geometric mean, if not pH dependent) |                |                                                                                                    |                   |                                            |                                          | 1.22                                                     |                          |                          |

| Phthalamic acid                 |                | Dark aerobic conditions Metabolite dosed or the precursor from which the f.f. was derived was xxx |                |                                         |                                       |                                                    |                       |                       |
|---------------------------------|----------------|---------------------------------------------------------------------------------------------------|----------------|-----------------------------------------|---------------------------------------|----------------------------------------------------|-----------------------|-----------------------|
| Soil type                       | X <sup>7</sup> | pH <sup>a)</sup>                                                                                  | t. °C / % MWHC | DT <sub>50</sub> / DT <sub>90</sub> (d) | f. f. k <sub>f</sub> /k <sub>dp</sub> | DT <sub>50</sub> (d) 20 °C pF2/10kPa <sup>b)</sup> | St. (χ <sup>2</sup> ) | Method of calculation |
| Arithmetic mean                 |                |                                                                                                   |                |                                         | 0.4                                   |                                                    |                       |                       |
| pH dependence, <i>Yes or No</i> |                |                                                                                                   |                |                                         |                                       | No                                                 |                       |                       |

| Phthalic acid                            |                | Dark aerobic conditions Metabolite dosed or the precursor from which the f.f. was derived was xxx |                |                                         |                                       |                                                    |                       |                                  |
|------------------------------------------|----------------|---------------------------------------------------------------------------------------------------|----------------|-----------------------------------------|---------------------------------------|----------------------------------------------------|-----------------------|----------------------------------|
| Soil type                                | X <sup>7</sup> | pH <sup>a)</sup>                                                                                  | t. °C / % MWHC | DT <sub>50</sub> / DT <sub>90</sub> (d) | f. f. k <sub>f</sub> /k <sub>dp</sub> | DT <sub>50</sub> (d) 20 °C pF2/10kPa <sup>b)</sup> | St. (χ <sup>2</sup> ) | Method of calculation            |
| Sandy clay loam                          |                | 7.2                                                                                               | 20 ± 2 °C pF 2 | 0.17/0.57                               | 1.00                                  | 0.17                                               | 9.17                  | From Phthalamic acid SFO-SFO-SFO |
| Persistence Endpoints (worst case value) |                |                                                                                                   |                | 0.17/0.57                               |                                       |                                                    |                       |                                  |
| Geometric mean (if not pH dependent)     |                |                                                                                                   |                |                                         |                                       | 0.17                                               |                       |                                  |
| Arithmetic mean                          |                |                                                                                                   |                |                                         | 1.00                                  |                                                    |                       |                                  |
| pH dependence, <i>Yes or No</i>          |                |                                                                                                   |                |                                         |                                       | No                                                 |                       |                                  |

**Rate of degradation field soil dissipation studies (Regulation (EU) N° 283/2013, Annex Part A, point 7.1.2.2.1 and Regulation (EU) N° 284/2013, Annex Part A, point 9.1.1.2.1)**

|         |                                                                       |
|---------|-----------------------------------------------------------------------|
| Phosmet | US field dissipation studies considered as supplementary information. |
|---------|-----------------------------------------------------------------------|

**Rate of degradation in soil (anaerobic) laboratory studies active substance (Regulation (EU) N° 283/2013, Annex Part A, point 7.1.2.1.3 and Regulation (EU) N° 284/2013, Annex Part A, point 9.1.1.1)**

| Phosmet                          |                | Dark anaerobic conditions |                |                                         |                                          |                       |                       |
|----------------------------------|----------------|---------------------------|----------------|-----------------------------------------|------------------------------------------|-----------------------|-----------------------|
| Soil type                        | X <sup>4</sup> | pH <sup>a)</sup>          | t. °C / % MWHC | DT <sub>50</sub> / DT <sub>90</sub> (d) | DT <sub>50</sub> (d) 20 °C <sup>b)</sup> | St. (χ <sup>2</sup> ) | Method of calculation |
| Sandy Loam                       |                | 5.0                       | 20 ± 2 °C pF 2 | 6.1/20.2                                | 6.1                                      | 11.5                  | SFO                   |
| Sandy Loam                       |                | 5.0                       | 20 ± 2 °C pF 2 | 5.20/35.15                              | 5.20                                     | 5.48                  | FOMC                  |
| Persistence endpoint             |                |                           |                | 5.20                                    |                                          |                       |                       |
| Modelling endpoint <sup>c)</sup> |                |                           |                |                                         | 6.1                                      |                       |                       |

<sup>a)</sup> Measured in calcium chloride solution

<sup>b)</sup> Normalised using a Q10 of 2.58

<sup>c)</sup> DT<sub>50</sub> = DT<sub>90</sub>/3.32

<sup>4</sup> X This column is reserved for any other property that is considered to have a particular impact on the degradation rate. Column and this footnote may be removed if not used.

**Rate of degradation in soil (anaerobic) laboratory studies transformation products (Regulation (EU) N° 283/2013, Annex Part A, point 7.1.2.1.4 and Regulation (EU) N° 284/2013, Annex Part A, point 9.1.1.1)**

|                                      |                                                                                                                 |                  |                   |                                            |                                              |                                            |                     |                          |
|--------------------------------------|-----------------------------------------------------------------------------------------------------------------|------------------|-------------------|--------------------------------------------|----------------------------------------------|--------------------------------------------|---------------------|--------------------------|
| Desmethyl Phosmet                    | Dark anaerobic conditions Metabolite dosed or the precursor from which the f.f. was derived was<br><i>xxx</i> . |                  |                   |                                            |                                              |                                            |                     |                          |
| Soil type                            | $X^{10}$                                                                                                        | pH <sup>a)</sup> | t. °C / %<br>MWHC | DT <sub>50</sub> / DT <sub>90</sub><br>(d) | f. f.<br>k <sub>f</sub> /<br>k <sub>dp</sub> | DT <sub>50</sub> (d)<br>20°C <sup>b)</sup> | St.<br>( $\chi^2$ ) | Method of<br>calculation |
| Sandy Loam                           |                                                                                                                 | 5.0              | 20 ± 2 °C<br>pF 2 | 5.50/18.28                                 | 0.50                                         | 5.50                                       | 6.34                | From Phosmet<br>FOMC-SFO |
| Geometric mean (if not pH dependent) |                                                                                                                 |                  |                   |                                            |                                              | 5.50                                       |                     |                          |
| Arithmetic mean                      |                                                                                                                 |                  |                   |                                            | 0.50                                         |                                            |                     |                          |

<sup>a)</sup> Measured in [medium to be stated, usually calcium chloride solution or water]

<sup>b)</sup> Normalised using a Q10 of 2.58

**Rate of degradation on soil (photolysis) laboratory active substance (Regulation (EU) N° 283/2013, Annex Part A, point 7.1.1.3)**

|         |                                                                          |
|---------|--------------------------------------------------------------------------|
| Phosmet | Photodegradation of Phosmet insufficient to determine degradation rates. |
|---------|--------------------------------------------------------------------------|

**Soil adsorption active substance (Regulation (EU) N° 283/2013, Annex Part A, point 7.1.3.1.1 and Regulation (EU) N° 284/2013, Annex Part A, point 9.1.2.1)**

|                                       |      |         |                          |                            |                          |                            |            |              |
|---------------------------------------|------|---------|--------------------------|----------------------------|--------------------------|----------------------------|------------|--------------|
| Parent                                |      |         |                          |                            |                          |                            |            |              |
| Soil Type                             | OC % | Soil pH | K <sub>d</sub><br>(mL/g) | K <sub>doc</sub><br>(mL/g) | K <sub>F</sub><br>(mL/g) | K <sub>Foc</sub><br>(mL/g) | 1/n        |              |
| Loamy Sand                            | 0.68 | 4.9     | 5.75                     | 845                        | 4.0                      | 590                        | 0.889      |              |
| Sandy Loam                            | 1.01 | 7.3     | 7.98                     | 790                        | 4.9                      | 482                        | 0.865      |              |
| Loam                                  | 1.8  | 6.8     | 16.42                    | 912                        | 13.6                     | 757                        | 0.929      |              |
| Silt Loam                             | 2.2  | 5.6     | 21.09                    | 959                        | 15.8                     | 716                        | 0.892      |              |
| Geometric mean (if not pH dependent)* |      |         |                          |                            |                          | 8.06                       | <b>627</b> | -            |
| Arithmetic mean (if not pH dependent) |      |         |                          |                            |                          |                            |            | <b>0.894</b> |
| pH dependence, <i>Yes or No</i>       |      |         | No                       |                            |                          |                            |            |              |

\* Only relevant after implementation of the published EFSA guidance.

**Soil adsorption transformation products (Regulation (EU) N° 283/2013, Annex Part A, point 7.1.3.1.2 and Regulation (EU) N° 284/2013, Annex Part A, point 9.1.2.1)**

|                                       |      |                       |                       |                            |                          |                            |             |  |
|---------------------------------------|------|-----------------------|-----------------------|----------------------------|--------------------------|----------------------------|-------------|--|
| N-methoxymethyl phthalimide           |      |                       |                       |                            |                          |                            |             |  |
| Soil Type                             | OC % | Soil pH <sup>a)</sup> | K <sub>d</sub> (mL/g) | K <sub>doc</sub><br>(mL/g) | K <sub>F</sub><br>(mL/g) | K <sub>Foc</sub><br>(mL/g) | 1/n         |  |
| Sandy Loam                            | 1.5  | 5.6                   | 0.64-1.96             | 43-131                     | <b>0.76</b>              | <b>50.9</b>                | <b>0.77</b> |  |
| Sandy Loam                            | 3.4  | 5.1                   | 0.74-2.06             | 22-61                      | 0.82                     | 25.1                       | 0.85        |  |
| Sandy Clay Loam <sup>b)</sup>         | 3.9  | 7.2                   | 2.04-4.93             | 52-126                     | 2.09                     | 53.6                       | 0.81        |  |
| Geometric mean (if not pH dependent)* |      |                       |                       |                            |                          | 1.11                       | 40.91       |  |

|                                       |    |  |      |
|---------------------------------------|----|--|------|
| Arithmetic mean (if not pH dependent) |    |  | 0.81 |
| pH dependence, <i>Yes or No</i>       | No |  |      |

<sup>a)</sup> Measured in calcium chloride solution.

<sup>b)</sup> This soil did not fulfilled the OECD guideline 106. Therefore, worst case were proposed to be used by RMS (in bold)

\* Only relevant after implementation of the published EFSA guidance.

| Phthalimide                           |      |                       |                       |                         |                       |                         |      |
|---------------------------------------|------|-----------------------|-----------------------|-------------------------|-----------------------|-------------------------|------|
| Soil Type                             | OC % | Soil pH <sup>a)</sup> | K <sub>d</sub> (mL/g) | K <sub>doc</sub> (mL/g) | K <sub>F</sub> (mL/g) | K <sub>Foc</sub> (mL/g) | 1/n  |
| Sandy Loam                            | 1.5  | 5.6                   | 0.64-0.94             | 43-63                   | 0.74                  | 49.0                    | 0.95 |
| Sandy Loam                            | 3.4  | 5.1                   | 1.64-5.82             | 48-171                  | 1.7                   | 50.0                    | 0.77 |
| Clay                                  | 6.5  | 5.0                   | 0.29-1.93             | 4-30                    | 0.72*                 | 11.1*                   | 0.9* |
| Geometric mean (if not pH dependent)* |      |                       |                       |                         | 0.78                  | 30.1                    |      |
| Arithmetic mean (if not pH dependent) |      |                       |                       |                         |                       |                         | 0.87 |
| pH dependence, <i>Yes or No</i>       |      |                       |                       | No                      |                       |                         |      |

\* This soil did not obey Freundlich equation. Therefore the geometric mean of the K<sub>d</sub> values from each tested concentration and a default 1/n of 0.9 were proposed to be used by RMS.

#### Mobility in soil column leaching active substance (Regulation (EU) N° 283/2013, Annex Part A, point 7.1.4.1.1 and Regulation (EU) N° 284/2013, Annex Part A, point 9.1.2.1)

Column leaching

No data submitted, not required

#### Mobility in soil column leaching transformation products (Regulation (EU) N° 283/2013, Annex Part A, point 7.1.4.1.2 and Regulation (EU) N° 284/2013, Annex Part A, point 9.1.2.1)

Column leaching

No data submitted, not required

#### Lysimeter / field leaching studies (Regulation (EU) N° 283/2013, Annex Part A, points 7.1.4.2 / 7.1.4.3 and Regulation (EU) N° 284/2013, Annex Part A, points 9.1.2.2 / 9.1.2.3)

Lysimeter/ field leaching studies

No data submitted, not required



### Hydrolytic degradation (Regulation (EU) N° 283/2013, Annex Part A, point 7.2.1.1)

Hydrolytic degradation of the active substance and metabolites > 10 %

DT<sub>50</sub>, pH 4: 11.1 d at 25 °C (SFO,  $\chi^2=1.0$ )  
 N-hydroxymethyl phthalamic acid: 14.9 % AR (7 d)  
 Phthalic acid: 60.7 % AR (35 d)  
 Phthalamide: 16.0 % AR (35 d)  
 O,O dimethyl phosphorodithioc acid: 79.4 % molar basis (5 d)

DT<sub>50</sub>, pH 7: 10.1 h at 25 °C (SFO,  $\chi^2=2.4$ )  
 N-hydroxymethyl phthalamic acid: 19.1 % AR (40 h)  
 Phthalamic acid: 26.8 % AR (40 h)  
 Phthalamide: 42.5 % AR (24.5 h)

DT<sub>50</sub>, pH 9: 0.3 h at 25 °C (SFO,  $\chi^2=6.6$ )  
 N-hydroxymethyl phthalamic acid: 93.5 % AR (2.5 h)

### Aqueous photochemical degradation (Regulation (EU) N° 283/2013, Annex Part A, points 7.2.1.2 / 7.2.1.3)

Photolytic degradation of active substance and metabolites above 10 %

DT<sub>50</sub>: 23.9 – 108 h (pseudo 1<sup>st</sup> order, pH 5 and 25 °C)  
 Xenon arc lamp nominal intensity of 158 Wm<sup>-2</sup> in the range of 330-800 nm. The natural sunlight of the state of New Jersey in the same spectral range was 138.1W/m<sup>2</sup> on June 13, 1990

Phthalimide: 46 % AR (5 d)  
 N-hydroxymethyl phthalamic acid: 19.5 % AR (6 d)

Quantum yield of direct phototransformation in water at  $\Sigma > 290$  nm

0.01443 molecules degraded/photon

### 'Ready biodegradability' (Regulation (EU) N° 283/2013, Annex Part A, point 7.2.2.1)

Readily biodegradable (yes/no)

No.

### Aerobic mineralisation in surface water (Regulation (EU) N° 283/2013, Annex Part A, point 7.2.2.2 and Regulation (EU) N° 284/2013, Annex Part A, point 9.2.1)

| Phosmet                                                 |                |        |                     |                                                                         |                                                             |                   |                  |                       |
|---------------------------------------------------------|----------------|--------|---------------------|-------------------------------------------------------------------------|-------------------------------------------------------------|-------------------|------------------|-----------------------|
| System identifier (indicate fresh, estuarine or marine) | pH water phase | pH sed | t. °C <sup>a)</sup> | DT <sub>50</sub> /DT <sub>90</sub> whole sys. (suspended sediment test) | DT <sub>50</sub> /DT <sub>90</sub> (d) Water (pelagic test) |                   | St. ( $\chi^2$ ) | Method of calculation |
|                                                         |                |        |                     |                                                                         | At study temp                                               | Normalised (20°C) |                  |                       |
| River water 2 µg/L                                      | 8.2-8.8        | -      | 20                  | -                                                                       | 0.04 / 0.13                                                 | 0.04 / 0.13       | 0.8              | SFO                   |
| River water 10 µg/L                                     | 8.2-8.8        | -      | 20                  | -                                                                       | 0.04 / 0.13                                                 | 0.04 / 0.13       | 0.4              | SFO                   |

<sup>a)</sup> Temperature of incubation=std temperature of 20°C

|                                                               |                                                                                                     |           |                     |                                                                                  |                                                                                |   |            |                          |                          |
|---------------------------------------------------------------|-----------------------------------------------------------------------------------------------------|-----------|---------------------|----------------------------------------------------------------------------------|--------------------------------------------------------------------------------|---|------------|--------------------------|--------------------------|
| Phthalamic acid                                               | Max in total system: 97.4 % after 2 days for 2 µg/L system<br>97.3 % after 1 day for 10 µg/L system |           |                     |                                                                                  |                                                                                |   |            |                          |                          |
| System identifier<br>(indicate fresh,<br>estuarine or marine) | pH<br>water<br>phase                                                                                | pH<br>sed | t. °C <sup>a)</sup> | DT <sub>50</sub> /DT <sub>90</sub><br>whole sys.<br>(suspended<br>sediment test) | DT <sub>50</sub> /DT <sub>90</sub><br>Water (pelagic test)<br>At study<br>temp |   | Normalised | St.<br>(χ <sup>2</sup> ) | Method of<br>calculation |
| River water 2 µg/L                                            | 8.2-8.8                                                                                             | -         | 20                  | -                                                                                |                                                                                | - |            |                          |                          |
| River water 10 µg/L                                           | 8.2-8.8                                                                                             | -         | 20                  | -                                                                                |                                                                                | - |            |                          |                          |

<sup>a)</sup> Temperature of incubation=std temperature of 20°C

|                                                               |                                                                                                    |           |                     |                                                                                  |                                                                                |   |            |                          |                          |
|---------------------------------------------------------------|----------------------------------------------------------------------------------------------------|-----------|---------------------|----------------------------------------------------------------------------------|--------------------------------------------------------------------------------|---|------------|--------------------------|--------------------------|
| Phthalic acid                                                 | Max in total system: 3.2 % after 1 day for 2 µg/L system<br>6.0 % after 14 days for 10 µg/L system |           |                     |                                                                                  |                                                                                |   |            |                          |                          |
| System identifier<br>(indicate fresh,<br>estuarine or marine) | pH<br>water<br>phase                                                                               | pH<br>sed | t. °C <sup>a)</sup> | DT <sub>50</sub> /DT <sub>90</sub><br>whole sys.<br>(suspended<br>sediment test) | DT <sub>50</sub> /DT <sub>90</sub><br>Water (pelagic test)<br>At study<br>temp |   | Normalised | St.<br>(χ <sup>2</sup> ) | Method of<br>calculation |
| River water 10 µg/L                                           | 8.2-8.8                                                                                            | -         | 20                  | -                                                                                |                                                                                | - |            |                          |                          |

<sup>a)</sup> Temperature of incubation=std temperature of 20°C

|                                                                            |                      |           |                                                         |                                                                                   |                                                                                                   |
|----------------------------------------------------------------------------|----------------------|-----------|---------------------------------------------------------|-----------------------------------------------------------------------------------|---------------------------------------------------------------------------------------------------|
| Mineralisation and non extractable residues (for parent dosed experiments) |                      |           |                                                         |                                                                                   |                                                                                                   |
| System identifier<br>(indicate fresh,<br>estuarine or marine)              | pH<br>water<br>phase | pH<br>sed | Mineralisation<br>x % after n d. (end<br>of the study). | Non-extractable<br>residues. max x %<br>after n d<br>(suspended<br>sediment test) | Non-extractable residues.<br>max x % after n d (end of<br>the study) (suspended<br>sediment test) |
| River water 2 µg/L                                                         | 8.2-8.8              | -         | 78.2 after 62 d                                         | -                                                                                 | -                                                                                                 |
| River water 10 µg/L                                                        | 8.2-8.8              | -         | 86.9 after 62 d                                         | -                                                                                 | -                                                                                                 |

**Water / sediment study (Regulation (EU) N° 283/2013, Annex Part A, point 7.2.2.3 and Regulation (EU) N° 284/2013, Annex Part A, point 9.2.2)**

|                                     |                                                                                                                                                                                                                                       |                         |       |                                                      |                |                                                      |                |                                                    |
|-------------------------------------|---------------------------------------------------------------------------------------------------------------------------------------------------------------------------------------------------------------------------------------|-------------------------|-------|------------------------------------------------------|----------------|------------------------------------------------------|----------------|----------------------------------------------------|
| Phosmet                             | Max in water: 84.97 % after 0 d (sand wss)<br>87.83 % after 0 d (sandy silt loam wss)<br>Max in sediment: 10.70 % after 3 d (sand wss)<br>9.59 % after 0 d (sandy silt loam wss)<br>Dissipation in water phase based on decline phase |                         |       |                                                      |                |                                                      |                |                                                    |
| Water /<br>sediment<br>system (wss) | pH<br>water<br>phase <sup>b)</sup>                                                                                                                                                                                                    | pH sed<br><sup>a)</sup> | t. °C | DegT <sub>50</sub> /DegT <sub>90</sub><br>whole sys. | χ <sup>2</sup> | DissT <sub>50</sub><br>/DissT <sub>90</sub><br>water | χ <sup>2</sup> | DissT <sub>50</sub><br>/DissT <sub>90</sub><br>sed |
| Sand                                | 4.9                                                                                                                                                                                                                                   | 6.2                     | 20    | 1.00 / 3.32<br>(SFO)                                 | 13.8           | 0.47 / 1.55<br>(SFO)                                 | 0.1            | - <sup>c)</sup>                                    |
| Sandy silt<br>loam                  | 7.8                                                                                                                                                                                                                                   | 8.1                     | 20    | 0.08 / 0.28<br>(SFO)                                 | 15.3           | 0.06 / 0.21<br>(SFO)                                 | 3.3            | - <sup>c)</sup>                                    |
| Persistence Endpoints (worst case)  |                                                                                                                                                                                                                                       |                         |       | 1.00 / 3.32                                          |                | 0.47 / 1.55                                          |                | -                                                  |

|                                        |      |  |                 |  |   |
|----------------------------------------|------|--|-----------------|--|---|
| Modelling Endpoint                     |      |  |                 |  |   |
| Geometric mean DT <sub>50</sub> (days) | 0.28 |  | - <sup>d)</sup> |  | - |

<sup>a)</sup> Measured in water

<sup>b)</sup> Beginning of study

<sup>c)</sup> Not enough data points

<sup>d)</sup> Not derived as dissipation not relevant

| Phthalamic acid         | Max in water: 51.5 % after 7 d (sand wss)<br>75.8 % after 6 h (sandy silt loam wss)<br>Max in sediment: 4.0 % after 60 d (sand wss)<br>12.6 % after 7 d (sandy silt loam wss)<br>Degradation in the total system and dissipation in water phase based on decline phase. |                      |       |                               |                               |                       |                       |
|-------------------------|-------------------------------------------------------------------------------------------------------------------------------------------------------------------------------------------------------------------------------------------------------------------------|----------------------|-------|-------------------------------|-------------------------------|-----------------------|-----------------------|
| Water / sediment system | pH water phase <sup>b)</sup>                                                                                                                                                                                                                                            | pH sed <sup>a)</sup> | t. °C | DegT <sub>50</sub> whole sys. | DegT <sub>90</sub> whole sys. | St. (χ <sup>2</sup> ) | Method of calculation |
| Sand                    | 4.9                                                                                                                                                                                                                                                                     | 6.2                  | 20    | <sup>c)</sup>                 | <sup>c)</sup>                 | -                     | -                     |
| S. silt loam            | 7.8                                                                                                                                                                                                                                                                     | 8.1                  | 20    | <sup>c)</sup>                 | <sup>c)</sup>                 | -                     | -                     |
| Persistence Endpoints   |                                                                                                                                                                                                                                                                         |                      |       |                               |                               |                       |                       |
| Modelling Endpoint      |                                                                                                                                                                                                                                                                         |                      |       |                               |                               |                       |                       |
| Default value           |                                                                                                                                                                                                                                                                         |                      |       | 1000                          |                               |                       |                       |

<sup>a)</sup> Measured in water

<sup>b)</sup> Beginning of study

<sup>c)</sup> Not reliable values

| Phthalic acid                   | Max in water: 29.1 % after 3 d (sand wss)<br>37.6 % after 1 d (sandy silt loam wss)<br>Max in sediment: 4.6 % after 30 d (sandy silt loam wss)<br>Degradation in the total system and dissipation in water phase based on decline phase. |                      |       |                               |                               |                       |                       |
|---------------------------------|------------------------------------------------------------------------------------------------------------------------------------------------------------------------------------------------------------------------------------------|----------------------|-------|-------------------------------|-------------------------------|-----------------------|-----------------------|
| Water / sediment system         | pH water phase <sup>b)</sup>                                                                                                                                                                                                             | pH sed <sup>a)</sup> | t. °C | DegT <sub>50</sub> whole sys. | DegT <sub>90</sub> whole sys. | St. (χ <sup>2</sup> ) | Method of calculation |
| Sand                            | 4.9                                                                                                                                                                                                                                      | 6.2                  | 20    | <sup>c)</sup>                 | <sup>c)</sup>                 |                       | -                     |
| S. silt loam                    | 7.8                                                                                                                                                                                                                                      | 8.1                  | 20    | <sup>c)</sup>                 | <sup>c)</sup>                 | -                     | -                     |
| Persistence Endpoints           |                                                                                                                                                                                                                                          |                      |       | -                             | -                             |                       |                       |
| Modelling Endpoint              |                                                                                                                                                                                                                                          |                      |       |                               |                               |                       |                       |
| Default DT <sub>50</sub> (days) |                                                                                                                                                                                                                                          |                      |       | 1000                          |                               |                       |                       |

<sup>a)</sup> Measured in water

<sup>b)</sup> Beginning of study

<sup>c)</sup> Not reliable values

| N-hydroxymethyl phthalimide |                              | Max in water: 12.2 % after 3 d (sand wss)<br>4.3 % after 1 d (sandy silt loam wss)<br>Max in sediment: 1.9 % after 15 d (sand wss)<br>1.6 % after 15 d (sandy silt loam wss)<br>Degradation in the total system and dissipation in water phase based on decline phase. |       |                               |                               |                  |                       |
|-----------------------------|------------------------------|------------------------------------------------------------------------------------------------------------------------------------------------------------------------------------------------------------------------------------------------------------------------|-------|-------------------------------|-------------------------------|------------------|-----------------------|
| Water / sediment system     | pH water phase <sup>b)</sup> | pH sed <sup>a)</sup>                                                                                                                                                                                                                                                   | t. °C | DegT <sub>50</sub> whole sys. | DegT <sub>90</sub> whole sys. | St. ( $\chi^2$ ) | Method of calculation |
| Sand                        | 4.9                          | 6.2                                                                                                                                                                                                                                                                    | 20    | c)                            | c)                            | -                | -                     |
| S. silt loam                | 7.8                          | 8.1                                                                                                                                                                                                                                                                    | 20    | c)                            | c)                            | -                | -                     |
| Persistence Endpoints       |                              |                                                                                                                                                                                                                                                                        |       |                               |                               |                  |                       |
| Modelling Endpoint          |                              |                                                                                                                                                                                                                                                                        |       |                               |                               |                  |                       |
| Default value               |                              |                                                                                                                                                                                                                                                                        |       | 100                           |                               |                  |                       |

<sup>a)</sup> Measured in water

<sup>b)</sup> Beginning of study

<sup>c)</sup> Not reliable values

| Mineralisation and non extractable residues (from parent dosed experiments) |                              |                      |                                                   |                                                    |                                                                       |
|-----------------------------------------------------------------------------|------------------------------|----------------------|---------------------------------------------------|----------------------------------------------------|-----------------------------------------------------------------------|
| Water / sediment system                                                     | pH water phase <sup>b)</sup> | pH sed <sup>a)</sup> | Mineralisation x % after n d. (end of the study). | Non-extractable residues in sed. max x % after n d | Non-extractable residues in sed. max x % after n d (end of the study) |
| Sand                                                                        | 4.9                          | 6.2                  | 80.1 % after 100 d                                | 20.7 % after 15 d                                  | 12.1 % after 100 d                                                    |
| Sandy silt loam                                                             | 7.8                          | 8.1                  | 92.5 % after 100 d                                | 14.6 % after 30 d                                  | 5.7 % after 100 d                                                     |

<sup>a)</sup> Measured in water

<sup>b)</sup> Beginning of study

### Fate and behaviour in air (Regulation (EU) N° 283/2013, Annex Part A, point 7.3.1)

|                                                            |                                                                                                                                                                                                                                                                                                                                                                                                                                        |
|------------------------------------------------------------|----------------------------------------------------------------------------------------------------------------------------------------------------------------------------------------------------------------------------------------------------------------------------------------------------------------------------------------------------------------------------------------------------------------------------------------|
| Direct photolysis in air                                   | Not studied - no data requested.                                                                                                                                                                                                                                                                                                                                                                                                       |
| Photochemical oxidative degradation in air                 | DT <sub>50</sub> of 0.840 hours derived by AOPWIN (version 1.92), OH (12 h) concentration = $1.5 \times 10^6$ molecules/cm <sup>3</sup>                                                                                                                                                                                                                                                                                                |
| Volatilisation                                             | Vapour pressure: $3.38 \times 10^{-5}$ Pa (20 °C), semi-volatile from plant surfaces<br><br>from soil surfaces (BBA guideline): 0.45 % (soil incorporated) and 0.23 % (soil surface) after 24 h                                                                                                                                                                                                                                        |
| Metabolites<br>Phototchemical oxidative degradation in air | DT <sub>50</sub> derived by AOPWIN v1.92<br>N-hydroxymethyl phthalamic acid DT <sub>50</sub> of 0.534 d<br>N-hydroxymethyl phthalimide DT <sub>50</sub> of 0.365 d<br>Phthalimide DT <sub>50</sub> of 1.712 d<br>Phthalamic acid DT <sub>50</sub> of 3.56 d<br>Phthalic acid DT <sub>50</sub> of 8.65 d<br>O,O-dimethyl phosphorodithioic acid DT <sub>50</sub> of 0.183 d<br>O,O-dimethyl phosphoric acid DT <sub>50</sub> of 1.871 d |
| Metabolites<br>Volatilisation                              | N-hydroxymethyl phthalamic acid<br>Vapour pressure: $1.29 \times 10^{-6}$ Pa (20 °C), no-volatile from soil or plant surfaces<br>N-hydroxymethyl phthalimide                                                                                                                                                                                                                                                                           |

Vapour pressure:  $4.07 \times 10^{-6}$  Pa (20 °C),  
no-volatile from soil or plant surfaces  
Phthalimide  
Vapour pressure:  $5.82 \times 10^{-7}$  Pa (20 °C),  
no-volatile from soil or plant surfaces  
Phthalamic acid  
Vapour pressure:  $1.72 \times 10^{-7}$  Pa (20 °C),  
no-volatile from soil or plant surfaces  
Phthalic acid  
Vapour pressure:  $8.60 \times 10^{-8}$  Pa (20 °C),  
no-volatile from soil or plant surfaces  
O,O-dimethyl phosphorodithioic acid  
Vapour pressure: 37.3 Pa (20 °C),  
volatile from soil and plant surfaces  
O,O-dimethyl phosphoric acid  
Vapour pressure: 29.8 Pa (20 °C),  
volatile from soil and plant surfaces

#### Residues requiring further assessment (Regulation (EU) N° 283/2013, Annex Part A, point 7.4.1)

Environmental occurring residues requiring further assessment by other disciplines (toxicology and ecotoxicology) and or requiring consideration for groundwater exposure

Soil: Phosmet  
Surface water: Phosmet, N-hydroxymethyl phthalimide, phthalamic acid, phthalic acid, and the aqueous photolysis metabolites phthalimide, N-hydroxymethyl phthalamic acid.  
Sediment: Phosmet, phthalamic acid  
Ground water: Phosmet  
Air: Phosmet

#### Definition of the residue for monitoring (Regulation (EU) N° 283/2013, Annex Part A, point 7.4.2)

See section 5, Ecotoxicology

#### Monitoring data, if available (Regulation (EU) N° 283/2013, Annex Part A, point 7.5)

|                                                     |                    |
|-----------------------------------------------------|--------------------|
| Soil (indicate location and type of study)          | No data available. |
| Surface water (indicate location and type of study) | No data available. |
| Ground water (indicate location and type of study)  | No data available. |
| Air (indicate location and type of study)           | No data available. |

#### PEC soil (Regulation (EU) N° 284/2013, Annex Part A, points 9.1.3 / 9.3.1)

|                       |                                                                                    |
|-----------------------|------------------------------------------------------------------------------------|
| Parent                | DT <sub>50</sub> (d): 4.59 days                                                    |
| Method of calculation | Kinetics: FOMC<br>Field or Lab: <i>representative worst case from lab studies.</i> |

Application data

Crop: Citrus  
 Depth of soil layer: 5cm  
 Soil bulk density: 1.5g/cm<sup>3</sup>  
 % plant interception: 80%  
 Number of applications: 1  
 Interval (d): -  
 Application rate(s): 500 g a.s./ha

**PEC<sub>(s)</sub>**  
 (mg/kg)

Initial

Short term 24h

2d

4d

Long term 7d

14d

21d

28d

42d

50d

100d

Plateau concentration

|                       | Single application<br>Actual | Single application<br>Time weighted average |
|-----------------------|------------------------------|---------------------------------------------|
| Initial               | 0.1333                       | -                                           |
| Short term 24h        | 0.1125                       | 0.1229                                      |
| 2d                    | 0.0960                       | 0.1136                                      |
| 4d                    | 0.0721                       | 0.0985                                      |
| Long term 7d          | 0.0496                       | 0.0820                                      |
| 14d                   | 0.0249                       | 0.0587                                      |
| 21d                   | 0.0147                       | 0.0455                                      |
| 28d                   | 0.0095                       | 0.0371                                      |
| 42d                   | 0.0049                       | 0.0270                                      |
| 50d                   | 0.0036                       | 0.0233                                      |
| 100d                  | 0.0009                       | 0.0126                                      |
| Plateau concentration | 0.0001 mg/kg after 10 yr     |                                             |

Application data

Crop: Pome fruits (SEZ)  
 Depth of soil layer: 5 cm  
 Soil bulk density: 1.5 g/cm<sup>3</sup>  
 plant interception: 1<sup>st</sup> application 60 %, 2<sup>nd</sup> application 65 %  
 Number of applications: 2 (early application)  
 Interval (d): 20  
 Application rate(s): 750 g a.s./ha

| PEC <sub>(s)</sub><br>(mg/kg) | Single application       | Single application    | Multiple application     | Multiple application  |
|-------------------------------|--------------------------|-----------------------|--------------------------|-----------------------|
|                               | Actual                   | Time weighted average | Actual                   | Time weighted average |
| Initial                       | 0.4000                   | -                     | 0.4000                   | -                     |
| Short term                    | 24h                      | 0.3375                | 0.3688                   | 0.3688                |
|                               | 2d                       | 0.2881                | 0.3408                   | 0.3423                |
|                               | 4d                       | 0.2162                | 0.2956                   | 0.3000                |
| Long term                     | 7d                       | 0.1489                | 0.2460                   | 0.2608                |
|                               | 14d                      | 0.0748                | 0.1760                   | 0.1951                |
|                               | 21d                      | 0.0440                | 0.1365                   | 0.3393                |
|                               | 28d                      | 0.0286                | 0.1112                   | 0.1451                |
|                               | 42d                      | 0.0146                | 0.0810                   | 0.0506                |
|                               | 50d                      | 0.0107                | 0.0700                   | 0.0331                |
|                               | 100d                     | 0.0028                | 0.0378                   | 0.0066                |
| Plateau concentration         | 0.0002 mg/kg after 10 yr |                       | 0.0003 mg/kg after 10 yr | -                     |

Application data

Crop: Pome fruits (SEZ)  
 Depth of soil layer: 5 cm  
 Soil bulk density: 1.5 g/cm<sup>3</sup>  
 plant interception: 1<sup>st</sup> application 65 %, 2<sup>nd</sup> application 65 %  
 Number of applications: 2 (late application)  
 Interval (d): 20  
 Application rate(s): 750 g a.s./ha

| PEC <sub>(s)</sub><br>(mg/kg) | Single application       | Single application    | Multiple application       | Multiple application  |
|-------------------------------|--------------------------|-----------------------|----------------------------|-----------------------|
|                               | Actual                   | Time weighted average | Actual                     | Time weighted average |
| Initial                       | 0.350                    | -                     | 0.3913                     | -                     |
| Short term                    | 24h                      | 0.2953                | 0.3227                     | 0.3625                |
|                               | 2d                       | 0.2521                | 0.2982                     | 0.3368                |
|                               | 4d                       | 0.1892                | 0.2586                     | 0.2948                |
| Long term                     | 7d                       | 0.1303                | 0.2152                     | 0.2558                |
|                               | 14d                      | 0.0654                | 0.1540                     | 0.1909                |
|                               | 21d                      | 0.0385                | 0.1194                     | 0.1508                |
|                               | 28d                      | 0.0251                | 0.0973                     | 0.1618                |
|                               | 42d                      | 0.0128                | 0.0709                     | 0.1356                |
|                               | 50d                      | 0.0093                | 0.0613                     | 0.1202                |
|                               | 100d                     | 0.0024                | 0.0330                     | 0.0672                |
| Plateau concentration         | 0.0002 mg/kg after 10 yr |                       | < 0.0001 mg/kg after 10 yr | -                     |



Application data

Crop: Pome fruits (CEZ)  
 Depth of soil layer: 5 cm  
 Soil bulk density: 1.5 g/cm<sup>3</sup>  
 plant interception: 1<sup>st</sup> application 60 %, 2<sup>nd</sup> application 65 %  
 Number of applications: 2 (early application)  
 Interval (d): 20  
 Application rate(s): 500 g a.s./ha

| PEC <sub>(s)</sub><br>(mg/kg) | Single application       | Single application    | Multiple application     | Multiple application  |
|-------------------------------|--------------------------|-----------------------|--------------------------|-----------------------|
|                               | Actual                   | Time weighted average | Actual                   | Time weighted average |
| Initial                       | 0.2667                   |                       | 0.2667                   |                       |
| Short term                    | 24h                      | 0.2250                | 0.2458                   | 0.2458                |
|                               | 2d                       | 0.1921                | 0.2272                   | 0.2282                |
|                               | 4d                       | 0.1441                | 0.1970                   | 0.2000                |
| Long term                     | 7d                       | 0.0993                | 0.1640                   | 0.1739                |
|                               | 14d                      | 0.0498                | 0.1173                   | 0.1300                |
|                               | 21d                      | 0.0293                | 0.0910                   | 0.2262                |
|                               | 28d                      | 0.0191                | 0.0742                   | 0.0967                |
|                               | 42d                      | 0.0097                | 0.0540                   | 0.0337                |
|                               | 50d                      | 0.0071                | 0.0467                   | 0.0221                |
|                               | 100d                     | 0.0019                | 0.0252                   | 0.0044                |
| Plateau concentration         | 0.0001 mg/kg after 10 yr |                       | 0.0002 mg/kg after 10 yr | -                     |

Application data

Crop: Pome fruits (CEZ)  
 Depth of soil layer: 5 cm  
 Soil bulk density: 1.5 g/cm<sup>3</sup>  
 plant interception: 1<sup>st</sup> application 65 %, 2<sup>nd</sup> application 65 %  
 Number of applications: 2 (late application)  
 Interval (d): 20  
 Application rate(s): 500 g a.s./ha

| PEC <sub>(s)</sub><br>(mg/kg) | Single application       | Single application    | Multiple application      | Multiple application  |
|-------------------------------|--------------------------|-----------------------|---------------------------|-----------------------|
|                               | Actual                   | Time weighted average | Actual                    | Time weighted average |
| Initial                       | 0.2333                   |                       | 0.2608                    |                       |
| Short term 24h                | 0.1969                   | 0.2151                | 0.2226                    | 0.2417                |
| 2d                            | 0.1681                   | 0.1988                | 0.1921                    | 0.2245                |
| 4d                            | 0.1261                   | 0.1724                | 0.1473                    | 0.1965                |
| Long term 7d                  | 0.0869                   | 0.1435                | 0.1045                    | 0.1705                |
| 14d                           | 0.0436                   | 0.1026                | 0.0558                    | 0.1273                |
| 21d                           | 0.0257                   | 0.0796                | 0.0345                    | 0.1006                |
| 28d                           | 0.0167                   | 0.0649                | 0.0234                    | 0.1079                |
| 42d                           | 0.0085                   | 0.0472                | 0.0127                    | 0.0904                |
| 50d                           | 0.0062                   | 0.0408                | 0.0095                    | 0.0802                |
| 100d                          | 0.0016                   | 0.0220                | 0.0027                    | 0.0448                |
| Plateau concentration         | 0.0001 mg/kg after 10 yr |                       | <0.0001 mg/kg after 10 yr | -                     |

Application data

Crop: Peaches/Nectarine  
 Depth of soil layer: 5 cm  
 Soil bulk density: 1.5 g/cm<sup>3</sup>  
 plant interception: 1<sup>st</sup> application 65 %, 2<sup>nd</sup> application 65 %  
 Number of applications: 2 (early or late application)  
 Interval (d): 10  
 Application rate(s): 700 g a.s./ha

| PEC <sub>(s)</sub><br>(mg/kg) | Single application       | Single application    | Multiple application     | Multiple application  |
|-------------------------------|--------------------------|-----------------------|--------------------------|-----------------------|
|                               | Actual                   | Time weighted average | Actual                   | Time weighted average |
| Initial                       | 0.3267                   |                       | 0.4149                   | -                     |
| Short term                    | 24h                      | 0.2756                | 0.3011                   | 0.3853                |
|                               | 2d                       | 0.2353                | 0.2783                   | 0.3586                |
|                               | 4d                       | 0.1766                | 0.2414                   | 0.3156                |
| Long term                     | 7d                       | 0.1216                | 0.2009                   | 0.2771                |
|                               | 14d                      | 0.0611                | 0.1437                   | 0.2243                |
|                               | 21d                      | 0.0360                | 0.1114                   | 0.2050                |
|                               | 28d                      | 0.0234                | 0.0908                   | 0.1760                |
|                               | 42d                      | 0.0119                | 0.0661                   | 0.1326                |
|                               | 50d                      | 0.0087                | 0.0572                   | 0.1155                |
|                               | 100d                     | 0.0023                | 0.0308                   | 0.0631                |
| Plateau concentration         | 0.0001 mg/kg after 10 yr |                       | 0.0001 mg/kg after 10 yr |                       |

Application data

Crop: Potatoes  
 Depth of soil layer: 5 cm  
 Soil bulk density: 1.5 g/cm<sup>3</sup>  
 plant interception: early application 85 %  
 Number of applications: 1  
 Interval (d): -  
 Application rate(s): 500 g a.s./ha

| PEC <sub>(s)</sub><br>(mg/kg) | Single application | Single application    |
|-------------------------------|--------------------|-----------------------|
|                               | Actual             | Time weighted average |
| Initial                       | 0.1000             |                       |
| Short term                    | 24h                | 0.0844                |
|                               | 2d                 | 0.0720                |
|                               | 4d                 | 0.0541                |

| PEC <sub>(s)</sub><br>(mg/kg) | Single application<br>Actual | Single application<br>Time weighted average |
|-------------------------------|------------------------------|---------------------------------------------|
| Long term 7d                  | 0.0372                       | 0.0615                                      |
| 14d                           | 0.0187                       | 0.0440                                      |
| 21d                           | 0.0110                       | 0.0341                                      |
| 28d                           | 0.0072                       | 0.0278                                      |
| 42d                           | 0.0036                       | 0.0202                                      |
| 50d                           | 0.0027                       | 0.0175                                      |
| 100d                          | 0.0007                       | 0.0094                                      |
| Plateau concentration         | 0.0001 mg/kg after 10 yr     |                                             |

### PEC ground water (Regulation (EU) N° 284/2013, Annex Part A, point 9.2.4.1)

Method of calculation and type of study (*e.g.* modelling, field leaching, lysimeter)

For FOCUS gw modelling, values used –  
 Modelling using FOCUS model(s), with appropriate FOCUSgw scenarios, according to FOCUS guidance.  
 Model(s) used: FOCUS PELMO 5.5.3, FOCUS PEARL 4.4.4, MACRO 5.5.4

Parent: Phosmet  
 Water solubility (mg/L): 15.2 at pH 7 and 20 °C  
 Vapour pressure:  $3.38 \times 10^{-5}$  Pa at 20°C  
 Worst case DT<sub>50lab</sub> (n=3): 5.01 d (normalisation to 10kPa or pF2, 20 °C with Q10 of 2.58 and Walker equation coefficient 0.7).  
 K<sub>oc</sub>: Worst case 716 mL/g, Worst case 1/n = 0.982.

Application data

Crop: Citrus  
 Crop uptake factor: 0  
 Gross application rate: 500 g/ha.  
 Crop growth stage: BBCH 79-89  
 Canopy interception %: 80  
 Application rate net of interception: 100 g/ha.  
 No. of applications: 1  
 Interval (d): -  
 Time of application (absolute application date):  
 10 October

Application data

Crop: Pome fruits (SEZ)  
 Crop uptake factor: 0  
 Gross application rate: 750 g/ha.

|                  |                                                                                                                                                                                                                                                                                                                                                                                                                                                                                                                                                                                                                                                                                                                                                    |
|------------------|----------------------------------------------------------------------------------------------------------------------------------------------------------------------------------------------------------------------------------------------------------------------------------------------------------------------------------------------------------------------------------------------------------------------------------------------------------------------------------------------------------------------------------------------------------------------------------------------------------------------------------------------------------------------------------------------------------------------------------------------------|
|                  | <p>Crop growth stage: BBCH 67-85</p> <p>Canopy interception %:</p> <p>Early application – 1<sup>st</sup> appl. 60 %, 2<sup>nd</sup> appl. 65 %, Late application – 1<sup>st</sup> appl. &amp; 2<sup>nd</sup> appl. 65 %.</p> <p>Application rate net of interception:</p> <p>Early application – 1<sup>st</sup> appl. 300 g/ha, 2<sup>nd</sup> appl. 263 g/ha, Late application – 1<sup>st</sup> appl. &amp; 2<sup>nd</sup> appl. 263 g/ha.</p> <p>No. of applications: 2</p> <p>Interval (d): 20</p> <p>Time of application (relative application dates):</p> <p>Early appl. 7 weeks after emergence, late appl. 4 weeks before harvest.</p>                                                                                                      |
| Application data | <p>Crop: Pome fruits (CEZ)</p> <p>Crop uptake factor: 0</p> <p>Gross application rate: 500 g/ha.</p> <p>Crop growth stage: BBCH 67-85</p> <p>Canopy interception %:</p> <p>Early application – 1<sup>st</sup> appl. 60 %, 2<sup>nd</sup> appl. 65 %, Late application – 1<sup>st</sup> appl. &amp; 2<sup>nd</sup> appl. 65 %.</p> <p>Application rate net of interception:</p> <p>Early application – 1<sup>st</sup> appl. 200 g/ha, 2<sup>nd</sup> appl. 175 g/ha, Late application – 1<sup>st</sup> appl. &amp; 2<sup>nd</sup> appl. 175 g/ha.</p> <p>No. of applications: 2</p> <p>Interval (d): 20</p> <p>Time of application (relative application dates):</p> <p>Early appl. 7 weeks after emergence, late appl. 4 weeks before harvest.</p> |
| Application data | <p>Crop: Peaches/Nectarines</p> <p>Crop uptake factor: 0</p> <p>Gross application rate: 700 g/ha.</p> <p>Crop growth stage: BBCH 71-85</p> <p>Canopy interception %:</p> <p>Early/late application – 1<sup>st</sup> appl. &amp; 2<sup>nd</sup> appl. 65 %</p> <p>Application rate net of interception:</p> <p>Early/late application – 1<sup>st</sup> appl. &amp; 2<sup>nd</sup> appl. 245 g/ha.</p> <p>No. of applications: 2</p> <p>Interval (d): 10</p> <p>Time of application (relative application dates):</p> <p>Early appl. 9 weeks after emergence, late appl. 2 weeks before harvest.</p>                                                                                                                                                 |
| Application data | <p>Crop: Potatoes</p> <p>Crop uptake factor: 0</p> <p>Gross application rate: 500 g/ha.</p> <p>Crop growth stage: BBCH 40-49</p>                                                                                                                                                                                                                                                                                                                                                                                                                                                                                                                                                                                                                   |



Metabolite Phthalamic acid  
Parameters used in FOCUS<sub>sw</sub> step 1 and 2

Molecular weight (g/mol): 165.15  
Water solubility (mg/L): 1000 (default value)  
K<sub>fom</sub>/K<sub>foc</sub> (mL/g): 0 (default)  
DT<sub>50</sub> soil (d): 1.22  
DT<sub>50</sub> water/sediment system (d): 1000 days  
DT<sub>50</sub> water (d): 1000 days  
DT<sub>50</sub> sediment (d): 1000 days  
Crop interception: full canopy  
Maximum occurrence observed (% molar basis with respect to the parent)  
Soil: 0.01  
Total Water and Sediment: 75.8

Metabolite phthalic acid  
Parameters used in FOCUS<sub>sw</sub> step 1 and 2

Molecular weight (g/mol): 166.13  
Water solubility (mg/L): 1000 (default value)  
K<sub>fom</sub>/K<sub>foc</sub> (mL/g): 0 (default)  
DT<sub>50</sub> soil (d): 0.17  
DT<sub>50</sub> water/sediment system (d): 1000 days  
DT<sub>50</sub> water (d): 1000 days  
DT<sub>50</sub> sediment (d): 1000 days  
Crop interception: full canopy  
Maximum occurrence observed (% molar basis with respect to the parent)  
Soil: 0.88  
Total Water and Sediment: 37.6

Metabolite N-hydroxymethyl Phthalimide  
Parameters used in FOCUS<sub>sw</sub> step 1 and 2

Molecular weight (g/mol): 177.16  
Water solubility (mg/L): 1000 (default value)  
K<sub>fom</sub>/K<sub>foc</sub> (mL/g): 0 (default)  
DT<sub>50</sub> soil (d): 1000 days (default)  
DT<sub>50</sub> water/sediment system (d): 100 days\*  
DT<sub>50</sub> water (d): 100 days  
DT<sub>50</sub> sediment (d): 100 days  
Crop interception: full canopy  
Maximum occurrence observed (% molar basis with respect to the parent)  
Soil: 0.41  
Total Water and Sediment: 12.2

\*taking into consideration the moderate persistence of this metabolite and that in both water/sediment systems a high mineralisation (80%-92%) was reached at 100 days, the peer review considered a a DT<sub>50,whole syst</sub> of 100 days to be appropriate for modelling purposes (in place of the default 1000 days value)

|                                                                                       |                                                                                                                                                                                                                                                                                                                                                                                                                                                                                            |
|---------------------------------------------------------------------------------------|--------------------------------------------------------------------------------------------------------------------------------------------------------------------------------------------------------------------------------------------------------------------------------------------------------------------------------------------------------------------------------------------------------------------------------------------------------------------------------------------|
| Metabolite Phthalimide<br>Parameters used in FOCUSsw step 1 and 2                     | Molecular weight (g/mol): 147.13<br>Water solubility (mg/L): 1000 (default value)<br>Kfom/Kfoc (mL/g): 30.1<br>DT <sub>50</sub> soil (d): 0.32 days<br>DT <sub>50</sub> water/sediment system (d): 1000 days<br>DT <sub>50</sub> water (d): 1000 days<br>DT <sub>50</sub> sediment (d): 1000 days<br>Crop interception: full canopy<br>Maximum occurrence observed (% molar basis with respect to the parent)<br>Soil: 1.53<br>Total aqueous photolysis: 62.5                              |
| Metabolite N-hydroxymethyl phthalamic acid<br>Parameters used in FOCUSsw step 1 and 2 | Molecular weight (g/mol): 195.18<br>Water solubility (mg/L): 1000 (default value)<br>Kfom/Kfoc (mL/g): 0 (default value)<br>DT <sub>50</sub> soil (d): 1000 days (default value)<br>DT <sub>50</sub> water/sediment system (d): 1000 days<br>DT <sub>50</sub> water (d): 1000 days<br>DT <sub>50</sub> sediment (d): 1000 days<br>Crop interception: full canopy<br>Maximum occurrence observed (% molar basis with respect to the parent)<br>Soil: 2.44<br>Total aqueous photolysis: 19.5 |
| Application data                                                                      | Crop and growth stage: Citrus BBCH 79-89<br>Number of applications: 1<br>Interval (d): -<br>Application rate: 500 g a.s./ha<br>Application window:<br>Autumm application: 10 October until 9 November<br>Spring application: 31 of March until 30 of April<br>FOCUS scenarios: D6 (ditch), R4 (stream)                                                                                                                                                                                     |
| Application data                                                                      | Crop and growth stage: Pome fruits BBCH 67-85 (SEZ)<br>Number of applications: 2<br>Interval (d): 20<br>Application rate: 750 g a.s./ha<br>Application window: single appl. 30 days, multiple appl. 50 days (start early appl. – 7 weeks after emergence, end late appl. – 28 d before harvest), in both cases late spray drift<br>FOCUS scenarios: D3 (ditch), D4-5 (pond, stream), R1(pond, stream), R2-4 (stream)                                                                       |



Application data

Crop and growth stage: Pome fruits BBCH 67-85 (CEZ)  
 Number of applications: 2  
 Interval (d): 20  
 Application rate: 500 g a.s./ha  
 Application window: single appl. 30 days, multiple appl. 50 days (start early appl. – 7 weeks after emergence, end late appl. – 28 d before harvest), in both cases late spray drift  
 FOCUS scenarios: D3 (ditch), D4-5 (pond, stream), R1(pond, stream), R2-4 (stream)

Application data

Crop and growth stage: Peaches/Nectarines BBCH 71-85  
 Number of applications: 2  
 Interval (d): 10  
 Application rate: 700 g a.s./ha  
 Application window: single appl. 30 days, multiple appl. 40 days (start early appl. – 9 weeks after emergence, end late appl. – 14 d before harvest), in both cases late spray drift  
 FOCUS scenarios: D3 (ditch), D4-5 (pond, stream), R1(pond, stream), R2-4 (stream)

Application data

Crop and growth stage: Potatoes BBCH 40-49  
 Number of applications: 1  
 Interval (d): -  
 Application rate: 500 g a.s./ha  
 Application window: 30 days (start early appl. – 5 weeks after emergence, end late appl. – 7 d before harvest)  
 FOCUS scenarios: D3 (ditch), D4 (pond, stream), D6 1<sup>st</sup> and 2<sup>nd</sup> crop (ditch), R1(pond, stream), R2-3 (stream)

Main routes of entry

Spray drift  
 (for all crops and scenarios)

| FOCUS<br>STEP 3 Scenario                                                                                   | Water body               | Overall maximum<br>PEC <sub>sw</sub> [µg/L] |             | Overall maximum Max.<br>PEC <sub>sed</sub> [µg/kg] |             |
|------------------------------------------------------------------------------------------------------------|--------------------------|---------------------------------------------|-------------|----------------------------------------------------|-------------|
|                                                                                                            |                          |                                             |             |                                                    |             |
| <b>CITRUS</b><br>(1 x 500 g a.s./ha)<br><br>Deg50 <sub>wat</sub> = 0.28 d<br>Deg50 <sub>sed</sub> = 1000 d | D6 <sup>1</sup> ) ditch  | 18.45                                       | spray drift | 4.82                                               | spray drift |
|                                                                                                            | D6 <sup>2</sup> ) ditch  | 18.44                                       | spray drift | 5.11                                               | spray drift |
|                                                                                                            | R4 <sup>1</sup> ) stream | 12.73                                       | spray drift | 0.97                                               | spray drift |
|                                                                                                            | R4 <sup>2</sup> ) stream | 14.08                                       | spray drift | 1.71                                               | spray drift |
| <b>CITRUS</b><br>(1 x 500 g a.s./ha)<br><br>Deg50 <sub>wat</sub> = 0.28 d<br>Deg50 <sub>sed</sub> = 1000 d | D6 <sup>1</sup> ) ditch  | 18.45                                       | spray drift | 4.82                                               | spray drift |
|                                                                                                            | D6 <sup>2</sup> ) ditch  | 18.44                                       | spray drift | 5.96                                               | spray drift |
|                                                                                                            | R4 <sup>1</sup> ) stream | 12.73                                       | spray drift | 0.97                                               | spray drift |
|                                                                                                            | R4 <sup>2</sup> ) stream | 14.08                                       | spray drift | 1.62                                               | spray drift |

| FOCUS<br>STEP 3 Scenario                                                                                                                     | Water body | Overall maximum<br>PEC <sub>sw</sub> [µg/L] |             | Overall maximum Max.<br>PEC <sub>sed</sub> [µg/kg] |             |
|----------------------------------------------------------------------------------------------------------------------------------------------|------------|---------------------------------------------|-------------|----------------------------------------------------|-------------|
|                                                                                                                                              |            |                                             |             |                                                    |             |
| <b>POME FRUIT</b><br>Multiple early application<br>(2 x 750 g a.s./ha)<br><br>Deg50 <sub>wat</sub> = 0.28 d<br>Deg50 <sub>sed</sub> = 1000 d | D3 ditch   | 21.85                                       | spray drift | 5.29                                               | spray drift |
|                                                                                                                                              | D4 pond    | 1.032                                       | spray drift | 0.348                                              | spray drift |
|                                                                                                                                              | D4 stream  | 22.14                                       | spray drift | 3.61                                               | spray drift |
|                                                                                                                                              | D5 pond    | 1.032                                       | spray drift | 0.388                                              | spray drift |
|                                                                                                                                              | D5 stream  | 23.89                                       | spray drift | 4.72                                               | spray drift |
|                                                                                                                                              | R1 pond    | 1.031                                       | spray drift | 0.390                                              | spray drift |
|                                                                                                                                              | R1 stream  | 16.94                                       | spray drift | 3.51                                               | spray drift |
|                                                                                                                                              | R2 stream  | 22.66                                       | spray drift | 1.797                                              | spray drift |
|                                                                                                                                              | R3 stream  | 23.88                                       | spray drift | 4.25                                               | spray drift |
|                                                                                                                                              | R4 stream  | 16.56                                       | spray drift | 2.39                                               | spray drift |
| <b>POME FRUIT</b><br>Multiple early application<br>(2 x 750 g a.s./ha)<br><br>Deg50 <sub>wat</sub> = 1000 d<br>Deg50 <sub>sed</sub> = 0.28 d | D3 ditch   | 21.84                                       | spray drift | 5.12                                               | spray drift |
|                                                                                                                                              | D4 pond    | 1.603                                       | spray drift | 0.520                                              | spray drift |
|                                                                                                                                              | D4 stream  | 22.14                                       | spray drift | 2.91                                               | spray drift |
|                                                                                                                                              | D5 pond    | 1.593                                       | spray drift | 0.563                                              | spray drift |
|                                                                                                                                              | D5 stream  | 23.89                                       | spray drift | 3.92                                               | spray drift |
|                                                                                                                                              | R1 pond    | 1.618                                       | spray drift | 0.569                                              | spray drift |
|                                                                                                                                              | R1 stream  | 16.94                                       | spray drift | 1.887                                              | spray drift |
|                                                                                                                                              | R2 stream  | 22.66                                       | spray drift | 1.459                                              | spray drift |
|                                                                                                                                              | R3 stream  | 23.88                                       | spray drift | 3.40                                               | spray drift |
|                                                                                                                                              | R4 stream  | 16.56                                       | spray drift | 1.397                                              | spray drift |
| <b>POME FRUIT</b><br>Single early application<br>(1 x 750 g a.s./ha)<br><br>Deg50 <sub>wat</sub> = 0.28 d<br>Deg50 <sub>sed</sub> = 1000 d   | D3 ditch   | 27.54                                       | spray drift | 6.08                                               | spray drift |
|                                                                                                                                              | D4 pond    | 1.234                                       | spray drift | 0.336                                              | spray drift |
|                                                                                                                                              | D4 stream  | 27.61                                       | spray drift | 3.75                                               | spray drift |
|                                                                                                                                              | D5 pond    | 1.234                                       | spray drift | 0.411                                              | spray drift |
|                                                                                                                                              | D5 stream  | 29.81                                       | spray drift | 5.20                                               | spray drift |
|                                                                                                                                              | R1 pond    | 1.233                                       | spray drift | 0.363                                              | spray drift |
|                                                                                                                                              | R1 stream  | 21.15                                       | spray drift | 2.55                                               | spray drift |
|                                                                                                                                              | R2 stream  | 28.29                                       | spray drift | 1.94                                               | spray drift |
|                                                                                                                                              | R3 stream  | 29.82                                       | spray drift | 4.53                                               | spray drift |
|                                                                                                                                              | R4 stream  | 20.68                                       | spray drift | 2.44                                               | spray drift |
| <b>POME FRUIT</b><br>Single early application<br>(1 x 750 g a.s./ha)<br><br>Deg50 <sub>wat</sub> = 1000 d<br>Deg50 <sub>sed</sub> = 0.28 d   | D3 ditch   | 27.54                                       | spray drift | 6.43                                               | spray drift |
|                                                                                                                                              | D4 pond    | 1.234                                       | spray drift | 0.399                                              | spray drift |
|                                                                                                                                              | D4 stream  | 27.61                                       | spray drift | 3.48                                               | spray drift |
|                                                                                                                                              | D5 pond    | 1.234                                       | spray drift | 0.497                                              | spray drift |
|                                                                                                                                              | D5 stream  | 29.81                                       | spray drift | 4.89                                               | spray drift |
|                                                                                                                                              | R1 pond    | 1.233                                       | spray drift | 0.433                                              | spray drift |

| FOCUS<br>STEP 3 Scenario                                                                                                                    | Water body | Overall maximum<br>PEC <sub>sw</sub> [µg/L] |             | Overall maximum Max.<br>PEC <sub>sed</sub> [µg/kg] |             |
|---------------------------------------------------------------------------------------------------------------------------------------------|------------|---------------------------------------------|-------------|----------------------------------------------------|-------------|
|                                                                                                                                             |            |                                             |             |                                                    |             |
|                                                                                                                                             | R1 stream  | 21.15                                       | spray drift | 2.35                                               | spray drift |
|                                                                                                                                             | R2 stream  | 28.29                                       | spray drift | 1.820                                              | spray drift |
|                                                                                                                                             | R3 stream  | 29.82                                       | spray drift | 4.24                                               | spray drift |
|                                                                                                                                             | R4 stream  | 20.68                                       | spray drift | 1.543                                              | spray drift |
| <b>POME FRUIT</b><br>Múltiple late application<br>(1 x 750 g a.s./ha)<br><br>Deg50 <sub>wat</sub> = 0.28 d<br>Deg50 <sub>sed</sub> = 1000 d | D3 ditch   | 21.91                                       | spray drift | 6.13                                               | spray drift |
|                                                                                                                                             | D4 pond    | 1.032                                       | spray drift | 0.426                                              | spray drift |
|                                                                                                                                             | D4 stream  | 21.64                                       | spray drift | 2.35                                               | spray drift |
|                                                                                                                                             | D5 pond    | 1.032                                       | spray drift | 0.340                                              | spray drift |
|                                                                                                                                             | D5 stream  | 23.89                                       | spray drift | 4.51                                               | spray drift |
|                                                                                                                                             | R1 pond    | 1.031                                       | spray drift | 0.398                                              | spray drift |
|                                                                                                                                             | R1 stream  | 16.94                                       | spray drift | 2.34                                               | spray drift |
|                                                                                                                                             | R2 stream  | 22.70                                       | spray drift | 1.702                                              | spray drift |
|                                                                                                                                             | R3 stream  | 23.88                                       | spray drift | 3.66                                               | spray drift |
|                                                                                                                                             | R4 stream  | 16.94                                       | spray drift | 2.72                                               | spray drift |
| <b>POME FRUIT</b><br>Múltiple late application<br>(1 x 750 g a.s./ha)<br><br>Deg50 <sub>wat</sub> = 1000 d<br>Deg50 <sub>sed</sub> = 0.28 d | D3 ditch   | 21.91                                       | spray drift | 5.78                                               | spray drift |
|                                                                                                                                             | D4 pond    | 1.447                                       | spray drift | 0.721                                              | spray drift |
|                                                                                                                                             | D4 stream  | 21.64                                       | spray drift | 1.985                                              | spray drift |
|                                                                                                                                             | D5 pond    | 1.567                                       | spray drift | 0.502                                              | spray drift |
|                                                                                                                                             | D5 stream  | 23.89                                       | spray drift | 3.64                                               | spray drift |
|                                                                                                                                             | R1 pond    | 1.458                                       | spray drift | 0.579                                              | spray drift |
|                                                                                                                                             | R1 stream  | 16.94                                       | spray drift | 1.949                                              | spray drift |
|                                                                                                                                             | R2 stream  | 22.70                                       | spray drift | 1.357                                              | spray drift |
|                                                                                                                                             | R3 stream  | 23.88                                       | spray drift | 2.864                                              | spray drift |
|                                                                                                                                             | R4 stream  | 16.94                                       | spray drift | 1.691                                              | spray drift |
| <b>POME FRUIT</b><br>Single late application<br>(1 x 750 g a.s./ha)<br><br>Deg50 <sub>wat</sub> = 0.28 d<br>Deg50 <sub>sed</sub> = 1000 d   | D3 ditch   | 27.56                                       | spray drift | 6.81                                               | spray drift |
|                                                                                                                                             | D4 pond    | 1.234                                       | spray drift | 0.441                                              | spray drift |
|                                                                                                                                             | D4 stream  | 26.63                                       | spray drift | 2.07                                               | spray drift |
|                                                                                                                                             | D5 pond    | 1.234                                       | spray drift | 0.332                                              | spray drift |
|                                                                                                                                             | D5 stream  | 29.83                                       | spray drift | 4.85                                               | spray drift |
|                                                                                                                                             | R1 pond    | 1.233                                       | spray drift | 0.405                                              | spray drift |
|                                                                                                                                             | R1 stream  | 21.15                                       | spray drift | 2.58                                               | spray drift |
|                                                                                                                                             | R2 stream  | 28.35                                       | spray drift | 1.84                                               | spray drift |
|                                                                                                                                             | R3 stream  | 29.82                                       | spray drift | 3.81                                               | spray drift |
| R4 stream                                                                                                                                   | 21.15      | spray drift                                 | 4.03        | spray drift                                        |             |
| <b>POME FRUIT</b>                                                                                                                           | D3 ditch   | 27.56                                       | spray drift | 7.26                                               | spray drift |

| FOCUS<br>STEP 3 Scenario                                                                                                                     | Water body | Overall maximum<br>PEC <sub>sw</sub> [µg/L] |             | Overall maximum Max.<br>PEC <sub>sed</sub> [µg/kg] |             |
|----------------------------------------------------------------------------------------------------------------------------------------------|------------|---------------------------------------------|-------------|----------------------------------------------------|-------------|
|                                                                                                                                              |            |                                             |             |                                                    |             |
| Single late application<br>(1 x 750 g a.s./ha)<br><br>Deg50 <sub>wat</sub> = 1000 d<br>Deg50 <sub>sed</sub> = 0.28 d                         | D4 pond    | 1.234                                       | spray drift | 0.535                                              | spray drift |
|                                                                                                                                              | D4 stream  | 26.63                                       | spray drift | 1.960                                              | spray drift |
|                                                                                                                                              | D5 pond    | 1.234                                       | spray drift | 0.395                                              | spray drift |
|                                                                                                                                              | D5 stream  | 29.83                                       | spray drift | 4.54                                               | spray drift |
|                                                                                                                                              | R1 pond    | 1.233                                       | spray drift | 0.488                                              | spray drift |
|                                                                                                                                              | R1 stream  | 21.15                                       | spray drift | 2.43                                               | spray drift |
|                                                                                                                                              | R2 stream  | 28.35                                       | spray drift | 1.693                                              | spray drift |
|                                                                                                                                              | R3 stream  | 29.82                                       | spray drift | 3.57                                               | spray drift |
|                                                                                                                                              | R4 stream  | 21.15                                       | spray drift | 2.08                                               | spray drift |
| <b>POME FRUIT</b><br>Multiple early application<br>(2 x 500 g a.s./ha)<br><br>Deg50 <sub>wat</sub> = 0.28 d<br>Deg50 <sub>sed</sub> = 1000 d | D3 ditch   | 14.56                                       | spray drift | 3.58                                               | spray drift |
|                                                                                                                                              | D4 pond    | 0.689                                       | spray drift | 0.235                                              | spray drift |
|                                                                                                                                              | D4 stream  | 14.76                                       | spray drift | 2.43                                               | spray drift |
|                                                                                                                                              | D5 pond    | 0.688                                       | spray drift | 0.263                                              | spray drift |
|                                                                                                                                              | D5 stream  | 15.93                                       | spray drift | 3.18                                               | spray drift |
|                                                                                                                                              | R1 pond    | 0.688                                       | spray drift | 0.264                                              | spray drift |
|                                                                                                                                              | R1 stream  | 11.29                                       | spray drift | 2.36                                               | spray drift |
|                                                                                                                                              | R2 stream  | 15.10                                       | spray drift | 1.205                                              | spray drift |
|                                                                                                                                              | R3 stream  | 15.92                                       | spray drift | 2.86                                               | spray drift |
| <b>POME FRUIT</b><br>Multiple early application<br>(2 x 500 g a.s./ha)<br><br>Deg50 <sub>wat</sub> = 1000 d<br>Deg50 <sub>sed</sub> = 0.28 d | D3 ditch   | 14.56                                       | spray drift | 3.44                                               | spray drift |
|                                                                                                                                              | D4 pond    | 1.067                                       | spray drift | 0.349                                              | spray drift |
|                                                                                                                                              | D4 stream  | 14.79                                       | spray drift | 1.945                                              | spray drift |
|                                                                                                                                              | D5 pond    | 1.060                                       | spray drift | 0.379                                              | spray drift |
|                                                                                                                                              | D5 stream  | 15.93                                       | spray drift | 2.63                                               | spray drift |
|                                                                                                                                              | R1 pond    | 1.076                                       | spray drift | 0.382                                              | spray drift |
|                                                                                                                                              | R1 stream  | 11.29                                       | spray drift | 1.26                                               | spray drift |
|                                                                                                                                              | R2 stream  | 15.10                                       | spray drift | 0.974                                              | spray drift |
|                                                                                                                                              | R3 stream  | 15.92                                       | spray drift | 2.277                                              | spray drift |
| <b>POME FRUIT</b><br>Single early application<br>(1 x 500 g a.s./ha)<br><br>Deg50 <sub>wat</sub> = 0.28 d<br>Deg50 <sub>sed</sub> = 1000 d   | D3 ditch   | 18.36                                       | spray drift | 4.11                                               | spray drift |
|                                                                                                                                              | D4 pond    | 0.823                                       | spray drift | 0.227                                              | spray drift |
|                                                                                                                                              | D4 stream  | 18.40                                       | spray drift | 2.51                                               | spray drift |
|                                                                                                                                              | D5 pond    | 0.823                                       | spray drift | 0.246                                              | spray drift |
|                                                                                                                                              | D5 stream  | 18.89                                       | spray drift | 3.39                                               | spray drift |
|                                                                                                                                              | R1 pond    | 0.822                                       | spray drift | 0.245                                              | spray drift |
|                                                                                                                                              | R1 stream  | 14.10                                       | spray drift | 1.838                                              | spray drift |

| FOCUS<br>STEP 3 Scenario                                                                                                                    | Water body | Overall maximum<br>PEC <sub>sw</sub> [µg/L] |             | Overall maximum Max.<br>PEC <sub>sed</sub> [µg/kg] |             |
|---------------------------------------------------------------------------------------------------------------------------------------------|------------|---------------------------------------------|-------------|----------------------------------------------------|-------------|
|                                                                                                                                             |            |                                             |             |                                                    |             |
|                                                                                                                                             | R2 stream  | 18.86                                       | spray drift | 1.297                                              | spray drift |
|                                                                                                                                             | R3 stream  | 19.88                                       | spray drift | 2.92                                               | spray drift |
|                                                                                                                                             | R4 stream  | 13.78                                       | spray drift | 1.086                                              | spray drift |
| <b>POME FRUIT</b><br>Single early application<br>(1 x 500 g a.s./ha)<br><br>Deg50 <sub>wat</sub> = 1000 d<br>Deg50 <sub>sed</sub> = 0.28 d  | D3 ditch   | 18.36                                       | spray drift | 4.32                                               | spray drift |
|                                                                                                                                             | D4 pond    | 0.823                                       | spray drift | 0.268                                              | spray drift |
|                                                                                                                                             | D4 stream  | 18.40                                       | spray drift | 2.33                                               | spray drift |
|                                                                                                                                             | D5 pond    | 0.823                                       | spray drift | 0.334                                              | spray drift |
|                                                                                                                                             | D5 stream  | 19.88                                       | spray drift | 3.27                                               | spray drift |
|                                                                                                                                             | R1 pond    | 0.822                                       | spray drift | 0.291                                              | spray drift |
|                                                                                                                                             | R1 stream  | 14.10                                       | spray drift | 1.573                                              | spray drift |
|                                                                                                                                             | R2 stream  | 18.86                                       | spray drift | 1.215                                              | spray drift |
|                                                                                                                                             | R3 stream  | 19.88                                       | spray drift | 2.84                                               | spray drift |
|                                                                                                                                             | R4 stream  | 13.78                                       | spray drift | 1.031                                              | spray drift |
| <b>POME FRUIT</b><br>Multiple late application<br>(1 x 500 g a.s./ha)<br><br>Deg50 <sub>wat</sub> = 0.28 d<br>Deg50 <sub>sed</sub> = 1000 d | D3 ditch   | 14.61                                       | spray drift | 4.14                                               | spray drift |
|                                                                                                                                             | D4 pond    | 0.688                                       | spray drift | 0.289                                              | spray drift |
|                                                                                                                                             | D4 stream  | 14.43                                       | spray drift | 1.577                                              | spray drift |
|                                                                                                                                             | D5 pond    | 0.688                                       | spray drift | 0.230                                              | spray drift |
|                                                                                                                                             | D5 stream  | 15.93                                       | spray drift | 3.04                                               | spray drift |
|                                                                                                                                             | R1 pond    | 0.688                                       | spray drift | 0.269                                              | spray drift |
|                                                                                                                                             | R1 stream  | 11.29                                       | spray drift | 1.572                                              | spray drift |
|                                                                                                                                             | R2 stream  | 15.14                                       | spray drift | 1.141                                              | spray drift |
|                                                                                                                                             | R3 stream  | 15.92                                       | spray drift | 2.46                                               | spray drift |
| R4 stream                                                                                                                                   | 11.29      | spray drift                                 | 1.798       | spray drift                                        |             |
| <b>POME FRUIT</b><br>Multiple late application<br>(1 x 500 g a.s./ha)<br><br>Deg50 <sub>wat</sub> = 1000 d<br>Deg50 <sub>sed</sub> = 0.28 d | D3 ditch   | 14.61                                       | spray drift | 3.88                                               | spray drift |
|                                                                                                                                             | D4 pond    | 0.962                                       | spray drift | 0.485                                              | spray drift |
|                                                                                                                                             | D4 stream  | 14.43                                       | spray drift | 1.328                                              | spray drift |
|                                                                                                                                             | D5 pond    | 1.043                                       | spray drift | 0.337                                              | spray drift |
|                                                                                                                                             | D5 stream  | 15.93                                       | spray drift | 2.44                                               | spray drift |
|                                                                                                                                             | R1 pond    | 0.970                                       | spray drift | 0.389                                              | spray drift |
|                                                                                                                                             | R1 stream  | 11.29                                       | spray drift | 1.304                                              | spray drift |
|                                                                                                                                             | R2 stream  | 15.14                                       | spray drift | 0.906                                              | spray drift |
|                                                                                                                                             | R3 stream  | 15.92                                       | spray drift | 1.916                                              | spray drift |
|                                                                                                                                             | R4 stream  | 11.29                                       | spray drift | 1.130                                              | spray drift |
| <b>POME FRUIT</b><br>Single late application<br>(1 x 500 g a.s./ha)                                                                         | D3 ditch   | 18.37                                       | spray drift | 4.60                                               | spray drift |
|                                                                                                                                             | D4 pond    | 0.823                                       | spray drift | 0.298                                              | spray drift |
|                                                                                                                                             | D4 stream  | 17.75                                       | spray drift | 1.382                                              | spray drift |

| FOCUS<br>STEP 3 Scenario                                                                                                                             | Water body | Overall maximum<br>PEC <sub>sw</sub> [µg/L] |             | Overall maximum Max.<br>PEC <sub>sed</sub> [µg/kg] |             |
|------------------------------------------------------------------------------------------------------------------------------------------------------|------------|---------------------------------------------|-------------|----------------------------------------------------|-------------|
|                                                                                                                                                      |            |                                             |             |                                                    |             |
| Deg50 <sub>wat</sub> = 0.28 d<br>Deg50 <sub>sed</sub> = 1000 d                                                                                       | D5 pond    | 0.823                                       | spray drift | 0.224                                              | spray drift |
|                                                                                                                                                      | D5 stream  | 19.89                                       | spray drift | 3.26                                               | spray drift |
|                                                                                                                                                      | R1 pond    | 0.822                                       | spray drift | 2.74                                               | spray drift |
|                                                                                                                                                      | R1 stream  | 14.10                                       | spray drift | 1.729                                              | spray drift |
|                                                                                                                                                      | R2 stream  | 18.90                                       | spray drift | 1.232                                              | spray drift |
|                                                                                                                                                      | R3 stream  | 19.88                                       | spray drift | 2.56                                               | spray drift |
|                                                                                                                                                      | R4 stream  | 14.10                                       | spray drift | 2.68                                               | spray drift |
| <b>POME FRUIT</b><br>Single late application<br>(1 x 500 g a.s./ha)<br><br>Deg50 <sub>wat</sub> = 1000 d<br>Deg50 <sub>sed</sub> = 0.28 d            | D3 ditch   | 18.37                                       | spray drift | 4.88                                               | spray drift |
|                                                                                                                                                      | D4 pond    | 0.823                                       | spray drift | 0.360                                              | spray drift |
|                                                                                                                                                      | D4 stream  | 17.75                                       | spray drift | 1.310                                              | spray drift |
|                                                                                                                                                      | D5 pond    | 0.823                                       | spray drift | 0.265                                              | spray drift |
|                                                                                                                                                      | D5 stream  | 18.89                                       | spray drift | 3.04                                               | spray drift |
|                                                                                                                                                      | R1 pond    | 0.822                                       | spray drift | 0.328                                              | spray drift |
|                                                                                                                                                      | R1 stream  | 14.10                                       | spray drift | 1.625                                              | spray drift |
|                                                                                                                                                      | R2 stream  | 18.90                                       | spray drift | 1.130                                              | spray drift |
|                                                                                                                                                      | R3 stream  | 19.88                                       | spray drift | 2.39                                               | spray drift |
|                                                                                                                                                      | R4 stream  | 14.10                                       | spray drift | 1.390                                              | spray drift |
| <b>PEACHES/NECTARINES</b><br>Multiple early application<br>(2 x 700 g a.s./ha)<br><br>Deg50 <sub>wat</sub> = 0.28 d<br>Deg50 <sub>sed</sub> = 1000 d | D3 ditch   | 20.38                                       | spray drift | 5.14                                               | spray drift |
|                                                                                                                                                      | D4 pond    | 0.963                                       | spray drift | 0.336                                              | spray drift |
|                                                                                                                                                      | D4 stream  | 20.67                                       | spray drift | 3.46                                               | spray drift |
|                                                                                                                                                      | D5 pond    | 0.964                                       | spray drift | 0.380                                              | spray drift |
|                                                                                                                                                      | D5 stream  | 22.30                                       | spray drift | 4.67                                               | spray drift |
|                                                                                                                                                      | R1 pond    | 0.968                                       | spray drift | 0.407                                              | spray drift |
|                                                                                                                                                      | R1 stream  | 15.81                                       | spray drift | 2.94                                               | spray drift |
|                                                                                                                                                      | R2 stream  | 21.15                                       | spray drift | 2.70                                               | spray drift |
|                                                                                                                                                      | R3 stream  | 22.29                                       | spray drift | 4.81                                               | spray drift |
| <b>PEACHES/NECTARINES</b><br>Multiple early application<br>(2 x 700 g a.s./ha)<br><br>Deg50 <sub>wat</sub> = 1000 d<br>Deg50 <sub>sed</sub> = 0.28 d | D3 ditch   | 20.38                                       | spray drift | 5.14                                               | spray drift |
|                                                                                                                                                      | D4 pond    | 1.600                                       | spray drift | 0.519                                              | spray drift |
|                                                                                                                                                      | D4 stream  | 20.67                                       | spray drift | 2.71                                               | spray drift |
|                                                                                                                                                      | D5 pond    | 1.691                                       | spray drift | 0.599                                              | spray drift |
|                                                                                                                                                      | D5 stream  | 22.30                                       | spray drift | 3.55                                               | spray drift |
|                                                                                                                                                      | R1 pond    | 1.815                                       | spray drift | 0.581                                              | spray drift |
|                                                                                                                                                      | R1 stream  | 15.81                                       | spray drift | 3.31                                               | spray drift |
|                                                                                                                                                      | R2 stream  | 21.15                                       | spray drift | 1.362                                              | spray drift |
|                                                                                                                                                      | R3 stream  | 22.28                                       | spray drift | 3.05                                               | spray drift |

| FOCUS<br>STEP 3 Scenario                                                                                                                            | Water body | Overall maximum<br>PEC <sub>sw</sub> [µg/L] |             | Overall maximum Max.<br>PEC <sub>sed</sub> [µg/kg] |             |
|-----------------------------------------------------------------------------------------------------------------------------------------------------|------------|---------------------------------------------|-------------|----------------------------------------------------|-------------|
|                                                                                                                                                     |            |                                             |             |                                                    |             |
|                                                                                                                                                     | R4 stream  | 15.81                                       | spray drift | 1.626                                              | spray drift |
| <b>PEACHES/NECTARINES</b><br>Single early application<br>(2 x 700 g a.s./ha)<br><br>Deg50 <sub>wat</sub> = 0.28 d<br>Deg50 <sub>sed</sub> = 1000 d  | D3 ditch   | 25.71                                       | spray drift | 5.69                                               | spray drift |
|                                                                                                                                                     | D4 pond    | 1.152                                       | spray drift | 0.314                                              | spray drift |
|                                                                                                                                                     | D4 stream  | 25.76                                       | spray drift | 3.50                                               | spray drift |
|                                                                                                                                                     | D5 pond    | 1.152                                       | spray drift | 0.341                                              | spray drift |
|                                                                                                                                                     | D5 stream  | 27.85                                       | spray drift | 4.71                                               | spray drift |
|                                                                                                                                                     | R1 pond    | 1.151                                       | spray drift | 0.340                                              | spray drift |
|                                                                                                                                                     | R1 stream  | 19.74                                       | spray drift | 2.56                                               | spray drift |
|                                                                                                                                                     | R2 stream  | 26.41                                       | spray drift | 1.812                                              | spray drift |
|                                                                                                                                                     | R3 stream  | 27.83                                       | spray drift | 4.07                                               | spray drift |
|                                                                                                                                                     | R4 stream  | 19.30                                       | spray drift | 1.516                                              | spray drift |
| <b>PEACHES/NECTARINES</b><br>Single early application<br>(2 x 700 g a.s./ha)<br><br>Deg50 <sub>wat</sub> = 1000 d<br>Deg50 <sub>sed</sub> = 0.28 d  | D3 ditch   | 25.71                                       | spray drift | 6.01                                               | spray drift |
|                                                                                                                                                     | D4 pond    | 1.152                                       | spray drift | 0.373                                              | spray drift |
|                                                                                                                                                     | D4 stream  | 25.76                                       | spray drift | 3.25                                               | spray drift |
|                                                                                                                                                     | D5 pond    | 1.152                                       | spray drift | 0.408                                              | spray drift |
|                                                                                                                                                     | D5 stream  | 27.85                                       | spray drift | 4.42                                               | spray drift |
|                                                                                                                                                     | R1 pond    | 1.151                                       | spray drift | 0.401                                              | spray drift |
|                                                                                                                                                     | R1 stream  | 19.74                                       | spray drift | 2.20                                               | spray drift |
|                                                                                                                                                     | R2 stream  | 26.41                                       | spray drift | 1.699                                              | spray drift |
|                                                                                                                                                     | R3 stream  | 27.83                                       | spray drift | 3.80                                               | spray drift |
| R4 stream                                                                                                                                           | 19.30      | spray drift                                 | 1.440       | spray drift                                        |             |
| <b>PEACHES/NECTARINES</b><br>Multiple late application<br>(2 x 700 g a.s./ha)<br><br>Deg50 <sub>wat</sub> = 0.28 d<br>Deg50 <sub>sed</sub> = 1000 d | D3 ditch   | 20.39                                       | spray drift | 8.62                                               | spray drift |
|                                                                                                                                                     | D4 pond    | 0.963                                       | spray drift | 0.440                                              | spray drift |
|                                                                                                                                                     | D4 stream  | 20.20                                       | spray drift | 2.22                                               | spray drift |
|                                                                                                                                                     | D5 pond    | 0.963                                       | spray drift | 0.357                                              | spray drift |
|                                                                                                                                                     | D5 stream  | 22.30                                       | spray drift | 4.54                                               | spray drift |
|                                                                                                                                                     | R1 pond    | 0.963                                       | spray drift | 0.505                                              | spray drift |
|                                                                                                                                                     | R1 stream  | 15.81                                       | spray drift | 2.36                                               | spray drift |
|                                                                                                                                                     | R2 stream  | 21.19                                       | spray drift | 1.576                                              | spray drift |
|                                                                                                                                                     | R3 stream  | 22.28                                       | spray drift | 3.97                                               | spray drift |
| R4 stream                                                                                                                                           | 15.81      | spray drift                                 | 7.06        | spray drift                                        |             |
| <b>PEACHES/NECTARINES</b><br>Multiple late application<br>(2 x 700 g a.s./ha)<br><br>Deg50 <sub>wat</sub> = 1000 d                                  | D3 ditch   | 20.38                                       | spray drift | 7.71                                               | spray drift |
|                                                                                                                                                     | D4 pond    | 1.543                                       | spray drift | 0.769                                              | spray drift |
|                                                                                                                                                     | D4 stream  | 20.20                                       | spray drift | 1.854                                              | spray drift |
|                                                                                                                                                     | D5 pond    | 1.668                                       | spray drift | 0.571                                              | spray drift |
|                                                                                                                                                     | D5 stream  | 22.30                                       | spray drift | 3.50                                               | spray drift |

| FOCUS<br>STEP 3 Scenario                                                                                                                              | Water body                    | Overall maximum<br>PEC <sub>sw</sub> [µg/L] |             | Overall maximum Max.<br>PEC <sub>sed</sub> [µg/kg] |             |
|-------------------------------------------------------------------------------------------------------------------------------------------------------|-------------------------------|---------------------------------------------|-------------|----------------------------------------------------|-------------|
|                                                                                                                                                       |                               |                                             |             |                                                    |             |
| Deg50 <sub>sed</sub> = 0.28 d                                                                                                                         | R1 pond                       | 1.503                                       | spray drift | 0.815                                              | spray drift |
|                                                                                                                                                       | R1 stream                     | 15.81                                       | spray drift | 1.947                                              | spray drift |
|                                                                                                                                                       | R2 stream                     | 21.19                                       | spray drift | 1.312                                              | spray drift |
|                                                                                                                                                       | R3 stream                     | 22.28                                       | spray drift | 2.89                                               | spray drift |
|                                                                                                                                                       | R4 stream                     | 15.81                                       | spray drift | 2.26                                               | spray drift |
| <b>PEACHES/NECTARINES</b><br><br>Single late application<br>(2 x 700 g a.s./ha)<br><br>Deg50 <sub>wat</sub> = 0.28 d<br>Deg50 <sub>sed</sub> = 1000 d | D3 ditch                      | 25.72                                       | spray drift | 6.37                                               | spray drift |
|                                                                                                                                                       | D4 pond                       | 1.152                                       | spray drift | 0.413                                              | spray drift |
|                                                                                                                                                       | D4 stream                     | 25.23                                       | spray drift | 2.46                                               | spray drift |
|                                                                                                                                                       | D5 pond                       | 1.152                                       | spray drift | 0.312                                              | spray drift |
|                                                                                                                                                       | D5 stream                     | 27.85                                       | spray drift | 4.54                                               | spray drift |
|                                                                                                                                                       | R1 pond                       | 1.152                                       | spray drift | 0.379                                              | spray drift |
|                                                                                                                                                       | R1 stream                     | 19.74                                       | spray drift | 2.41                                               | spray drift |
|                                                                                                                                                       | R2 stream                     | 26.46                                       | spray drift | 1.771                                              | spray drift |
|                                                                                                                                                       | R3 stream                     | 27.83                                       | spray drift | 3.86                                               | spray drift |
|                                                                                                                                                       | R4 stream                     | 19.74                                       | spray drift | 2.13                                               | spray drift |
| <b>PEACHES/NECTARINES</b><br><br>Single late application<br>(2 x 700 g a.s./ha)<br><br>Deg50 <sub>wat</sub> = 1000 d<br>Deg50 <sub>sed</sub> = 0.28 d | D3 ditch                      | 25.72                                       | spray drift | 6.78                                               | spray drift |
|                                                                                                                                                       | D4 pond                       | 1.152                                       | spray drift | 0.577                                              | spray drift |
|                                                                                                                                                       | D4 stream                     | 25.23                                       | spray drift | 2.32                                               | spray drift |
|                                                                                                                                                       | D5 pond                       | 1.152                                       | spray drift | 0.369                                              | spray drift |
|                                                                                                                                                       | D5 stream                     | 27.85                                       | spray drift | 4.24                                               | spray drift |
|                                                                                                                                                       | R1 pond                       | 1.151                                       | spray drift | 0.456                                              | spray drift |
|                                                                                                                                                       | R1 stream                     | 19.74                                       | spray drift | 2.27                                               | spray drift |
|                                                                                                                                                       | R2 stream                     | 26.46                                       | spray drift | 1.636                                              | spray drift |
|                                                                                                                                                       | R3 stream                     | 27.83                                       | spray drift | 3.60                                               | spray drift |
| <b>POTATOES</b><br><br>Single early application<br>(1 x 500 g a.s./ha)<br><br>Deg50 <sub>wat</sub> = 0.28 d<br>Deg50 <sub>sed</sub> = 1000 d          | D3 ditch                      | 2.62                                        | spray drift | 0.584                                              | spray drift |
|                                                                                                                                                       | D4 pond                       | 0.106                                       | spray drift | 0.037                                              | spray drift |
|                                                                                                                                                       | D4 stream                     | 2.12                                        | spray drift | 0.076                                              | spray drift |
|                                                                                                                                                       | D6 1 <sup>st</sup> crop ditch | 2.61                                        | spray drift | 0.499                                              | spray drift |
|                                                                                                                                                       | D6 2 <sup>nd</sup> crop ditch | 2.59                                        | spray drift | 0.365                                              | spray drift |
|                                                                                                                                                       | R1 pond                       | 0.217                                       | Runoff      | 0.211                                              | Runoff      |
|                                                                                                                                                       | R1 stream                     | 2.98                                        | Runoff      | 4.04                                               | Runoff      |
|                                                                                                                                                       | R2 stream                     | 2.40                                        | spray drift | 0.421                                              | spray drift |
|                                                                                                                                                       | R3 stream                     | 3.64                                        | Runoff      | 1.59                                               | Runoff      |
|                                                                                                                                                       | D3 ditch                      | 2.62                                        | spray drift | 0.571                                              | spray drift |



| FOCUS<br>STEP 3 Scenario                                                                                                                 | Water body                    | Overall maximum<br>PEC <sub>sw</sub> [µg/L] |             | Overall maximum Max.<br>PEC <sub>sed</sub> [µg/kg] |             |
|------------------------------------------------------------------------------------------------------------------------------------------|-------------------------------|---------------------------------------------|-------------|----------------------------------------------------|-------------|
|                                                                                                                                          |                               |                                             |             |                                                    |             |
| <b>POTATOES</b><br>Single early application<br>(1 x 500 g a.s./ha)<br><br>Deg50 <sub>wat</sub> = 1000 d<br>Deg50 <sub>sed</sub> = 0.28 d | D4 pond                       | 0.106                                       | spray drift | 0.043                                              | spray drift |
|                                                                                                                                          | D4 stream                     | 2.12                                        | spray drift | 0.073                                              | spray drift |
|                                                                                                                                          | D6 1 <sup>st</sup> crop ditch | 2.61                                        | spray drift | 0.475                                              | spray drift |
|                                                                                                                                          | D6 2 <sup>nd</sup> crop ditch | 2.59                                        | spray drift | 0.334                                              | spray drift |
|                                                                                                                                          | R1 pond                       | 0.439                                       | Runoff      | 0.166                                              | Runoff      |
|                                                                                                                                          | R1 stream                     | 3.02                                        | Runoff      | 2.371                                              | Runoff      |
|                                                                                                                                          | R2 stream                     | 2.40                                        | spray drift | 0.270                                              | spray drift |
|                                                                                                                                          | R3 stream                     | 3.77                                        | Runoff      | 0.990                                              | Runoff      |
| <b>POTATOES</b><br>Single late application<br>(1 x 500 g a.s./ha)<br><br>Deg50 <sub>wat</sub> = 0.28 d<br>Deg50 <sub>sed</sub> = 1000 d  | D3 ditch                      | 2.62                                        | spray drift | 0.551                                              | spray drift |
|                                                                                                                                          | D4 pond                       | 0.106                                       | spray drift | 0.032                                              | spray drift |
|                                                                                                                                          | D4 stream                     | 1.970                                       | spray drift | 0.048                                              | spray drift |
|                                                                                                                                          | D6 1 <sup>st</sup> crop ditch | 2.60                                        | spray drift | 0.391                                              | spray drift |
|                                                                                                                                          | D6 2 <sup>nd</sup> crop ditch | 5.05                                        | drainage    | 1.176                                              | spray drift |
|                                                                                                                                          | R1 pond                       | 0.106                                       | spray drift | 0.031                                              | spray drift |
|                                                                                                                                          | R1 stream                     | 1.818                                       | spray drift | 0.219                                              | spray drift |
|                                                                                                                                          | R2 stream                     | 2.44                                        | spray drift | 0.832                                              | spray drift |
| <b>POTATOES</b><br>Single late application<br>(1 x 500 g a.s./ha)<br><br>Deg50 <sub>wat</sub> = 1000 d<br>Deg50 <sub>sed</sub> = 0.28 d  | D3 ditch                      | 2.62                                        | spray drift | 0.554                                              | spray drift |
|                                                                                                                                          | D4 pond                       | 0.106                                       | spray drift | 0.043                                              | spray drift |
|                                                                                                                                          | D4 stream                     | 1.969                                       | spray drift | 0.045                                              | spray drift |
|                                                                                                                                          | D6 1 <sup>st</sup> crop ditch | 2.60                                        | spray drift | 0.369                                              | spray drift |
|                                                                                                                                          | D6 2 <sup>nd</sup> crop ditch | 5.27                                        | drainage    | 0.718                                              | drainage    |
|                                                                                                                                          | R1 pond                       | 0.106                                       | spray drift | 0.036                                              | spray drift |
|                                                                                                                                          | R1 stream                     | 1.818                                       | spray drift | 0.202                                              | spray drift |
|                                                                                                                                          | R2 stream                     | 2.44                                        | spray drift | 0.527                                              | spray drift |
| R3 stream                                                                                                                                | 2.56                          | spray drift                                 | 0.919       | spray drift                                        |             |

In bold values below the RAC

<sup>1)</sup> First application window: 10/10 – 30/11 (autumn application)

<sup>2)</sup> Second application window: 31/3 – 30/04 (spring application)

## METABOLITES

### Phthalamic acid

| FOCUS STEP 1                                         | PEC <sub>SW</sub> (µg/L) | PEC <sub>SED</sub> (µg/kg) |
|------------------------------------------------------|--------------------------|----------------------------|
| Scenario                                             | Actual                   | Actual                     |
| Citrus (1 x 0.5 kg a.s./ha)                          | 76.09                    | < 0.001                    |
| Pome fruit (2 x 0.75 kg a.s./ha, early appl.)        | 254.84                   | < 0.001                    |
| Pome fruit (2 x 0.5 kg a.s./ha, early appl.)         | 169.89                   | < 0.001                    |
| Peaches/Nectarines (2 x 0.7 kg a.s./ha, early appl.) | 237.84                   | < 0.001                    |
| Potatoes (1 x 0.5 kg a.s./ha)                        | 67.56                    | < 0.001                    |

| FOCUS STEP 2                                                      | PEC <sub>SW</sub> (µg/L) | PEC <sub>SED</sub> (µg/kg) |
|-------------------------------------------------------------------|--------------------------|----------------------------|
| Scenario                                                          | Actual                   | Actual                     |
| Citrus (1 x 0.5 kg a.s./ha, SE, Oct-Feb)                          | 10.85                    | < 0.001                    |
| Pome fruit (2 x 0.75 kg a.s./ha, SE, Jun-Sep, early appl.)        | 50.94                    | < 0.001                    |
| Pome fruit (2 x 0.5 kg a.s./ha, SE and NE, Jun-Sep, early appl.)  | 33.96                    | < 0.001                    |
| Peaches/Nectarines (2 x 0.7 kg a.s./ha, SE, Jun-Sep, early appl.) | 47.21                    | < 0.001                    |
| Potatoes (1 x 0.5 kg a.s./ha, SE, Mar-May)                        | 2.62                     | < 0.001                    |

| FOCUS STEP 2                                                                               | Day after overall maximum | PEC <sub>SW</sub> (µg/L) |       | PEC <sub>SED</sub> (µg/kg) |         |
|--------------------------------------------------------------------------------------------|---------------------------|--------------------------|-------|----------------------------|---------|
|                                                                                            |                           | Actual                   | TWA   | Actual                     | TWA     |
| Peaches/ Nectarines<br>(2 x 0.7 kg a.s./ha)<br>Southern Europe, Jun<br>Sep,<br>Early appl. | 0 d                       | <b>47.71</b>             | -     | <b>&lt; 0.001</b>          |         |
|                                                                                            | 1 d                       | 47.68                    | 47.69 | < 0.001                    | < 0.001 |
|                                                                                            | 2 d                       | 47.64                    | 47.68 | < 0.001                    | < 0.001 |
|                                                                                            | 4 d                       | 47.58                    | 47.64 | < 0.001                    | < 0.001 |
|                                                                                            | 7 d                       | 47.48                    | 47.59 | < 0.001                    | < 0.001 |
|                                                                                            | 14 d                      | 47.25                    | 47.48 | < 0.001                    | < 0.001 |
|                                                                                            | 21 d                      | 47.02                    | 47.36 | < 0.001                    | < 0.001 |
|                                                                                            | 28 d                      | 46.79                    | 47.25 | < 0.001                    | < 0.001 |
|                                                                                            | 42 d                      | 46.34                    | 47.02 | < 0.001                    | < 0.001 |
|                                                                                            | 50 d                      | 46.08                    | 46.89 | < 0.001                    | < 0.001 |
|                                                                                            | 100 d                     | 44.51                    | 46.09 | < 0.001                    | < 0.001 |

### Phthalic acid

| FOCUS STEP 1                                  | PEC <sub>SW</sub> (µg/L) | PEC <sub>SED</sub> (µg/kg) |
|-----------------------------------------------|--------------------------|----------------------------|
| Scenario                                      | Actual                   | Actual                     |
| Citrus (1 x 0.5 kg a.s./ha)                   | 37.97                    | < 0.001                    |
| Pome fruit (2 x 0.75 kg a.s./ha, early appl.) | 127.16                   | < 0.001                    |
| Pome fruit (2 x 0.5 kg a.s./ha, early appl.)  | 84.77                    | < 0.001                    |

| FOCUS STEP 1                                         | PEC <sub>SW</sub> (µg/L) | PEC <sub>SED</sub> (µg/kg) |
|------------------------------------------------------|--------------------------|----------------------------|
| Scenario                                             | Actual                   | Actual                     |
| Peaches/Nectarines (2 x 0.7 kg a.s./ha, early appl.) | 118.68                   | < 0.001                    |
| Potatoes (1 x 0.5 kg a.s./ha)                        | 33.71                    | < 0.001                    |

| FOCUS STEP 2                                                      | PEC <sub>SW</sub> (µg/L) | PEC <sub>SED</sub> (µg/kg) |
|-------------------------------------------------------------------|--------------------------|----------------------------|
| Scenario                                                          | Actual                   | Actual                     |
| Citrus (1 x 0.5 kg a.s./ha, SE, Oct-Feb, Jun-Sep)                 | 5.16                     | < 0.001                    |
| Pome fruit (2 x 0.75 kg a.s./ha, SE, Jun-Sep, early appl.)        | 24.95                    | < 0.001                    |
| Pome fruit (2 x 0.5 kg a.s./ha, SE and NE, Jun-Sep, early appl.)  | 16.64                    | < 0.001                    |
| Peaches/Nectarines (2 x 0.7 kg a.s./ha, SE, Jun-Sep, early appl.) | 23.37                    | < 0.001                    |
| Potatoes (1 x 0.5 kg a.s./ha, SE and NE, Mar-May, Jun-Sep)        | 0.91                     | < 0.001                    |

### N-hydroxymethyl Phthalimide

| FOCUS STEP 1                                         | PEC <sub>SW</sub> (µg/L) | PEC <sub>SED</sub> (µg/kg) |
|------------------------------------------------------|--------------------------|----------------------------|
| Scenario                                             | Actual                   | Actual                     |
| Citrus (1 x 0.5 kg a.s./ha)                          | 13.14                    | < 0.001                    |
| Pome fruit (2 x 0.75 kg a.s./ha, early appl.)        | 44.0                     | < 0.001                    |
| Pome fruit (2 x 0.5 kg a.s./ha, early appl.)         | 29.34                    | < 0.001                    |
| Peaches/Nectarines (2 x 0.7 kg a.s./ha, early appl.) | 41.07                    | < 0.001                    |
| Potatoes (1 x 0.5 kg a.s./ha)                        | 11.67                    | < 0.001                    |

| FOCUS STEP 2                                                      | PEC <sub>SW</sub> (µg/L) | PEC <sub>SED</sub> (µg/kg) |
|-------------------------------------------------------------------|--------------------------|----------------------------|
| Scenario                                                          | Actual                   | Actual                     |
| Citrus (1 x 0.5 kg a.s./ha, SE, Oct-Feb)                          | 2.64                     | < 0.001                    |
| Pome fruit (2 x 0.75 kg a.s./ha, SE, Jun-Sep, early appl.)        | 11.45                    | < 0.001                    |
| Pome fruit (2 x 0.5 kg a.s./ha, SE, Jun-Sep, early appl.)         | 6.85                     | < 0.001                    |
| Peaches/Nectarines (2 x 0.7 kg a.s./ha, SE, Jun-Sep, early appl.) | 10.95                    | < 0.001                    |
| Potatoes (1 x 0.5 kg a.s./ha, SE, Mar-May)                        | 1.66                     | < 0.001                    |

| FOCUS STEP 2<br>Scenario                                                                   | Day after<br>overall<br>maximum | PEC <sub>SW</sub> (µg/L) |       | PEC <sub>SED</sub> (µg/kg) |         |
|--------------------------------------------------------------------------------------------|---------------------------------|--------------------------|-------|----------------------------|---------|
|                                                                                            |                                 | Actual                   | TWA   | Actual                     | TWA     |
| Peaches/ Nectarines<br>(2 x 0.7 kg a.s./ha)<br>Southern Europe, Jun<br>Sep,<br>Early appl. | 0 d                             | <b>11.38</b>             | -     | <b>&lt; 0.001</b>          |         |
|                                                                                            | 1 d                             | 11.37                    | 11.38 | < 0.001                    | < 0.001 |
|                                                                                            | 2 d                             | 11.37                    | 11.37 | < 0.001                    | < 0.001 |
|                                                                                            | 4 d                             | 11.35                    | 11.37 | < 0.001                    | < 0.001 |
|                                                                                            | 7 d                             | 11.33                    | 11.35 | < 0.001                    | < 0.001 |
|                                                                                            | 14 d                            | 11.27                    | 11.33 | < 0.001                    | < 0.001 |
|                                                                                            | 21 d                            | 11.22                    | 11.30 | < 0.001                    | < 0.001 |
|                                                                                            | 28 d                            | 11.16                    | 11.27 | < 0.001                    | < 0.001 |
|                                                                                            | 42 d                            | 11.06                    | 11.22 | < 0.001                    | < 0.001 |
|                                                                                            | 50 d                            | 10.99                    | 11.19 | < 0.001                    | < 0.001 |
|                                                                                            | 100 d                           | 10.62                    | 11.00 | < 0.001                    | < 0.001 |

### Phthalimide

| FOCUS STEP 1<br>Scenario                             | PEC <sub>SW</sub> (µg/L) | PEC <sub>SED</sub> (µg/kg) |
|------------------------------------------------------|--------------------------|----------------------------|
|                                                      | Actual                   | Actual                     |
| Citrus (1 x 0.5 kg a.s./ha)                          | 54.03                    | 16.16                      |
| Pome fruit (2 x 0.75 kg a.s./ha, early appl.)        | 181.61                   | 54.13                      |
| Pome fruit (2 x 0.5 kg a.s./ha, early appl.)         | 121.07                   | 36.09                      |
| Peaches/Nectarines (2 x 0.7 kg a.s./ha, early appl.) | 169.50                   | 50.53                      |
| Potatoes (1 x 0.5 kg a.s./ha)                        | 47.77                    | 14.35                      |

| FOCUS STEP 2<br>Scenario                                          | PEC <sub>SW</sub> (µg/L) | PEC <sub>SED</sub> (µg/kg) |
|-------------------------------------------------------------------|--------------------------|----------------------------|
|                                                                   | Actual                   | Actual                     |
| Citrus (1 x 0.5 kg a.s./ha, SE, Oct-Feb, Jun-Sep)                 | 7.59                     | 2.19                       |
| Pome fruit (2 x 0.75 kg a.s./ha, SE, Jun-Sep, early appl.)        | 36.26                    | 10.60                      |
| Pome fruit (2 x 0.5 kg a.s./ha, SE and NE, Jun-Sep, early appl.)  | 24.17                    | 7.06                       |
| Peaches/Nectarines (2 x 0.7 kg a.s./ha, SE, Jun-Sep, early appl.) | 33.96                    | 9.92                       |
| Potatoes (1 x 0.5 kg a.s./ha, SE and NE, Mar-May, Jun-Sep)        | 1.33                     | 0.38                       |

| FOCUS STEP 2<br>Scenario                                                      | Day after<br>overall<br>maximum | PEC <sub>SW</sub> (µg/L) |       | PEC <sub>SED</sub> (µg/kg) |       |
|-------------------------------------------------------------------------------|---------------------------------|--------------------------|-------|----------------------------|-------|
|                                                                               |                                 | Actual                   | TWA   | Actual                     | TWA   |
| Pomes<br>(2 x 0.75 kg a.s./ha)<br>Southern Europe, Jun<br>Sep,<br>Early appl. | 0 d                             | <b>36.26</b>             |       | 10.60                      |       |
|                                                                               | 1 d                             | 35.76                    | 36.01 | 10.59                      | 10.59 |
|                                                                               | 2 d                             | 35.73                    | 35.88 | 10.58                      | 10.59 |
|                                                                               | 4 d                             | 35.68                    | 35.79 | 10.57                      | 10.58 |
|                                                                               | 7 d                             | 35.15                    | 35.57 | 10.54                      | 10.57 |
|                                                                               | 14 d                            | 34.98                    | 35.32 | 10.49                      | 10.54 |
|                                                                               | 21 d                            | 34.81                    | 35.18 | 10.44                      | 10.52 |
|                                                                               | 28 d                            | 34.64                    | 35.06 | 10.39                      | 10.49 |
|                                                                               | 42 d                            | 34.31                    | 34.87 | 10.29                      | 10.44 |
|                                                                               | 50 d                            | 34.12                    | 34.76 | 10.23                      | 10.41 |
|                                                                               | 100 d                           | 32.96                    | 34.15 | 9.89                       | 10.24 |

#### N-hydroxymethyl phthalamic acid

| FOCUS STEP 1<br>Scenario                             | PEC <sub>SW</sub> (µg/L) | PEC <sub>SED</sub> (µg/kg) |
|------------------------------------------------------|--------------------------|----------------------------|
|                                                      | Actual                   | Actual                     |
| Citrus (1 x 0.5 kg a.s./ha)                          | 25.63                    | < 0.001                    |
| Pome fruit (2 x 0.75 kg a.s./ha, early appl.)        | 76.90                    | < 0.001                    |
| Pome fruit (2 x 0.5 kg a.s./ha, early appl.)         | 51.27                    | < 0.001                    |
| Peaches/Nectarines (2 x 0.7 kg a.s./ha, early appl.) | 71.78                    | < 0.001                    |
| Potatoes (1 x 0.5 kg a.s./ha)                        | 23.04                    | < 0.001                    |

| FOCUS STEP 2<br>Scenario                                          | PEC <sub>SW</sub> (µg/L) | PEC <sub>SED</sub> (µg/kg) |
|-------------------------------------------------------------------|--------------------------|----------------------------|
|                                                                   | Actual                   | Actual                     |
| Citrus (1 x 0.5 kg a.s./ha, SE, Oct-Feb)                          | 4.078                    | < 0.001                    |
| Pome fruit (2 x 0.75 kg a.s./ha, SE, Jun-Sep, early appl.)        | 9.479                    | < 0.001                    |
| Pome fruit (2 x 0.5 kg a.s./ha, SE, Jun-Sep, early appl.)         | 6.320                    | < 0.001                    |
| Peaches/Nectarines (2 x 0.7 kg a.s./ha, SE, Jun-Sep, early appl.) | 9.045                    | < 0.001                    |
| Potatoes (1 x 0.5 kg a.s./ha, SE, Mar-May)                        | 1.965                    | < 0.001                    |

Parent

Parameters used in FOCUSsw step 4 (if performed)

Version control no.'s of FOCUS software:

SWAN 4.0.1

Deposition due to volatilisation (EVA 2.1) included (see PECair)

Risk mitigation measures, if necessary:

Buffer zone: 25 m

Vegetated filter strip: 20 m

| <b>CITRUS</b><br>(500 g/ha)<br>Deg50 <sub>wat</sub> = 0.28 d<br>Deg50 <sub>sed</sub> = 1000 d | <b>No spray buffer = 20 m</b><br><b>Vegetative strip = 20 m</b> |                             |                                       |
|-----------------------------------------------------------------------------------------------|-----------------------------------------------------------------|-----------------------------|---------------------------------------|
| <b>FOCUS Step 4 Scenario</b>                                                                  | <b>Max. PEC<sub>sw</sub> [µg/L]</b>                             | <b>Dominant entry route</b> | <b>Max. PEC<sub>sed</sub> [µg/kg]</b> |
| D6 ditch <sup>1)</sup>                                                                        | 3.43                                                            | Spray Drift                 | 0.833                                 |
| R4 stream <sup>1)</sup>                                                                       | 1.375                                                           | Spray Drift                 | 0.521                                 |
| D6 ditch <sup>2)</sup>                                                                        | 1.716                                                           | Spray Drift                 | 0.535                                 |
| R4 stream <sup>2)</sup>                                                                       | 1.525                                                           | Spray Drift                 | 0.352                                 |

<sup>1)</sup> First application window: 10/10 – 30/11 (autumn application)<sup>2)</sup> Second application window: 31/3 – 30/04 (spring application)

| <b>CITRUS</b><br>(500 g/ha)<br>Deg50 <sub>wat</sub> = 1000 d<br>Deg50 <sub>sed</sub> = 0.28 d | <b>No spray buffer = 20 m</b><br><b>Vegetative strip = 20 m</b> |                             |                                       |
|-----------------------------------------------------------------------------------------------|-----------------------------------------------------------------|-----------------------------|---------------------------------------|
| <b>Scenario FOCUS</b>                                                                         | <b>Max. PEC<sub>sw</sub> [µg/L]</b>                             | <b>Dominant entry route</b> | <b>Max. PEC<sub>sed</sub> [µg/kg]</b> |
| D6 ditch <sup>1)</sup>                                                                        | 1.719                                                           | Spray Drift                 | 0.489                                 |
| R4 stream <sup>1)</sup>                                                                       | 1.375                                                           | Spray Drift                 | 0.214                                 |
| D6 ditch <sup>2)</sup>                                                                        | 1.717                                                           | Spray Drift                 | 0.610                                 |
| R4 stream <sup>2)</sup>                                                                       | 1.531                                                           | Spray Drift                 | 0.181                                 |

<sup>1)</sup> First application window: 10/10 – 30/11 (autumn application)<sup>2)</sup> Second application window: 31/3 – 30/04 (spring application)

| <b>POME FRUIT</b><br>Multiple early application<br>(750 g/ha)<br>Deg50 <sub>wat</sub> = 0.28 d<br>Deg50 <sub>sed</sub> = 1000 d |                                     | <b>No spray buffer = 20 m</b><br><b>Vegetative strip = 20 m</b> |                                       |
|---------------------------------------------------------------------------------------------------------------------------------|-------------------------------------|-----------------------------------------------------------------|---------------------------------------|
| <b>FOCUS Step 4 Scenario</b>                                                                                                    | <b>Max. PEC<sub>sw</sub> [µg/L]</b> | <b>Dominant entry route</b>                                     | <b>Max. PEC<sub>sed</sub> [µg/kg]</b> |
| D3 ditch                                                                                                                        | 2.07                                | Spray Drift                                                     | 0.561                                 |
| D4 pond                                                                                                                         | 0.268                               | Spray Drift                                                     | 0.099                                 |
| D4 stream                                                                                                                       | 2.40                                | Spray Drift                                                     | 0.418                                 |
| D5 pond                                                                                                                         | 0.268                               | Spray Drift                                                     | 0.11                                  |
| D5 stream                                                                                                                       | 2.593                               | Spray Drift                                                     | 0.550                                 |
| R1 pond                                                                                                                         | 0.269                               | Spray Drift                                                     | 0.109                                 |
| R1 stream                                                                                                                       | 1.848                               | Spray Drift                                                     | 0.636                                 |
| R2 stream                                                                                                                       | 2.48                                | Spray Drift                                                     | 0.229                                 |
| R3 stream                                                                                                                       | 2.59                                | Spray Drift                                                     | 0.494                                 |
| R4 stream                                                                                                                       | 1.816                               | Spray Drift                                                     | 0.540                                 |

| <b>POME FRUIT</b><br>Multiple early application<br>(750 g/ha)<br>Deg50 <sub>wat</sub> = 1000 d<br>Deg50 <sub>sed</sub> = 0.28 d |                                     | <b>No spray buffer = 20 m</b><br><b>Vegetative strip = 20 m</b> |                                       |
|---------------------------------------------------------------------------------------------------------------------------------|-------------------------------------|-----------------------------------------------------------------|---------------------------------------|
| <b>Scenario FOCUS</b>                                                                                                           | <b>Max. PEC<sub>sw</sub> [µg/L]</b> | <b>Dominant entry route</b>                                     | <b>Max. PEC<sub>sed</sub> [µg/kg]</b> |
| D3 ditch                                                                                                                        | 2.07                                | Spray Drift                                                     | 0.518                                 |
| D4 pond                                                                                                                         | 0.423                               | Spray Drift                                                     | 0.143                                 |
| D4 stream                                                                                                                       | 2.40                                | Spray Drift                                                     | 0.327                                 |
| D5 pond                                                                                                                         | 0.420                               | Spray Drift                                                     | 0.155                                 |
| D5 stream                                                                                                                       | 2.59                                | Spray Drift                                                     | 0.443                                 |
| R1 pond                                                                                                                         | 0.425                               | Spray Drift                                                     | 0.156                                 |
| R1 stream                                                                                                                       | 1.856                               | Spray Drift                                                     | 0.268                                 |
| R2 stream                                                                                                                       | 2.49                                | Spray Drift                                                     | 0.163                                 |
| R3 stream                                                                                                                       | 2.59                                | Spray Drift                                                     | 0.383                                 |
| R4 stream                                                                                                                       | 1.819                               | Spray Drift                                                     | 0.303                                 |

| <b>POME FRUIT</b><br>Single early application<br>(750 g/ha)<br>Deg50 <sub>wat</sub> = 0.28 d<br>Deg50 <sub>sed</sub> = 1000 d |                                     | <b>No spray buffer = 20 m</b><br><b>Vegetative strip = 20 m</b> |                                       |  |
|-------------------------------------------------------------------------------------------------------------------------------|-------------------------------------|-----------------------------------------------------------------|---------------------------------------|--|
| <b>FOCUS Step 4 Scenario</b>                                                                                                  | <b>Max. PEC<sub>sw</sub> [µg/L]</b> | <b>Dominant entry route</b>                                     | <b>Max. PEC<sub>sed</sub> [µg/kg]</b> |  |
| D3 ditch                                                                                                                      | 2.56                                | Spray Drift                                                     | 0.64                                  |  |
| D4 pond                                                                                                                       | 0.356                               | Spray Drift                                                     | 0.164                                 |  |
| D4 stream                                                                                                                     | 2.97                                | Spray Drift                                                     | 0.422                                 |  |
| D5 pond                                                                                                                       | 0.356                               | Spray Drift                                                     | 0.128                                 |  |
| D5 stream                                                                                                                     | 3.21                                | Spray Drift                                                     | 0.590                                 |  |
| R1 pond                                                                                                                       | 0.357                               | Spray Drift                                                     | 0.113                                 |  |
| R1 stream                                                                                                                     | 2.286                               | Spray Drift                                                     | 0.498                                 |  |
| R2 stream                                                                                                                     | 3.07                                | Spray Drift                                                     | 0.215                                 |  |
| R3 stream                                                                                                                     | 3.21                                | Spray Drift                                                     | 0.513                                 |  |
| R4 stream                                                                                                                     | 2.24                                | Runoff                                                          | 0.546                                 |  |

| <b>POME FRUIT</b><br>Single early application<br>(750 g/ha)<br>Deg50 <sub>wat</sub> = 1000 d<br>Deg50 <sub>sed</sub> = 0.28 d |                                     | <b>No spray buffer = 20 m</b><br><b>Vegetative strip = 20 m</b> |                                       |  |
|-------------------------------------------------------------------------------------------------------------------------------|-------------------------------------|-----------------------------------------------------------------|---------------------------------------|--|
| <b>Scenario FOCUS</b>                                                                                                         | <b>Max. PEC<sub>sw</sub> [µg/L]</b> | <b>Dominant entry route</b>                                     | <b>Max. PEC<sub>sed</sub> [µg/kg]</b> |  |
| D3 ditch                                                                                                                      | 2.56                                | Spray Drift                                                     | 0.643                                 |  |
| D4 pond                                                                                                                       | <b>0.360</b>                        | Spray Drift                                                     | 0.122                                 |  |
| D4 stream                                                                                                                     | 2.97                                | Spray Drift                                                     | 0.388                                 |  |
| D5 pond                                                                                                                       | 0.361                               | Spray Drift                                                     | 0.153                                 |  |
| D5 stream                                                                                                                     | 3.21                                | Spray Drift                                                     | 0.547                                 |  |
| R1 pond                                                                                                                       | 0.36                                | Spray Drift                                                     | 0.133                                 |  |
| R1 stream                                                                                                                     | 2.29                                | Spray Drift                                                     | 0.266                                 |  |
| R2 stream                                                                                                                     | 3.07                                | Spray Drift                                                     | 0.201                                 |  |
| R3 stream                                                                                                                     | 3.21                                | Spray Drift                                                     | 0.472                                 |  |



|                                                                                                                               |                                                                 |                                       |                                                           |
|-------------------------------------------------------------------------------------------------------------------------------|-----------------------------------------------------------------|---------------------------------------|-----------------------------------------------------------|
| <b>POME FRUIT</b><br>Single early application<br>(750 g/ha)<br>Deg50 <sub>wat</sub> = 1000 d<br>Deg50 <sub>sed</sub> = 0.28 d | <b>No spray buffer = 20 m</b><br><b>Vegetative strip = 20 m</b> |                                       |                                                           |
| <b>Scenario</b><br><b>FOCUS</b>                                                                                               | <b>Max. PEC<sub>sw</sub></b><br><b>[µg/L]</b>                   | <b>Dominant</b><br><b>entry route</b> | <b>Max.</b><br><b>PEC<sub>sed</sub></b><br><b>[µg/kg]</b> |
| R4 stream                                                                                                                     | 2.25                                                            | Spray Drift                           | 0.303                                                     |

|                                                                                                                                |                                                                 |                                                 |                                                           |
|--------------------------------------------------------------------------------------------------------------------------------|-----------------------------------------------------------------|-------------------------------------------------|-----------------------------------------------------------|
| <b>POME FRUIT</b><br>Multiple late application<br>(750 g/ha)<br>Deg50 <sub>wat</sub> = 0.28 d<br>Deg50 <sub>sed</sub> = 1000 d | <b>No spray buffer = 20 m</b><br><b>Vegetative strip = 20 m</b> |                                                 |                                                           |
| <b>FOCUS Step 4</b><br><b>Scenario</b>                                                                                         | <b>Max.</b><br><b>PEC<sub>sw</sub></b><br><b>[µg/L]</b>         | <b>Dominant</b><br><b>entry</b><br><b>route</b> | <b>Max.</b><br><b>PEC<sub>sed</sub></b><br><b>[µg/kg]</b> |
| D3 ditch                                                                                                                       | 2.08                                                            | Spray Drift                                     | 0.654                                                     |
| D4 pond                                                                                                                        | 0.268                                                           | Spray Drift                                     | 0.122                                                     |
| D4 stream                                                                                                                      | 2.36                                                            | Spray Drift                                     | 0.269                                                     |
| D5 pond                                                                                                                        | 0.268                                                           | Spray Drift                                     | 0.097                                                     |
| D5 stream                                                                                                                      | 2.59                                                            | Spray Drift                                     | 0.525                                                     |
| R1 pond                                                                                                                        | 0.269                                                           | Spray Drift                                     | 0.114                                                     |
| R1 stream                                                                                                                      | 1.849                                                           | Spray Drift                                     | 0.269                                                     |
| R2 stream                                                                                                                      | 2.48                                                            | Spray Drift                                     | 0.195                                                     |
| R3 stream                                                                                                                      | 2.59                                                            | Spray Drift                                     | 0.619                                                     |
| R4 stream                                                                                                                      | 1.847                                                           | Spray Drift                                     | 0.554                                                     |

| <b>POME FRUIT</b><br>Multiple late application<br>(750 g/ha)<br>Deg50 <sub>wat</sub> = 1000 d<br>Deg50 <sub>sed</sub> = 0.28 d |                                     | <b>No spray buffer = 20 m</b><br><b>Vegetative strip = 20 m</b> |                                       |
|--------------------------------------------------------------------------------------------------------------------------------|-------------------------------------|-----------------------------------------------------------------|---------------------------------------|
| <b>Scenario FOCUS</b>                                                                                                          | <b>Max. PEC<sub>sw</sub> [µg/L]</b> | <b>Dominant entry route</b>                                     | <b>Max. PEC<sub>sed</sub> [µg/kg]</b> |
| D3 ditch                                                                                                                       | 2.08                                | Spray Drift                                                     | 0.597                                 |
| D4 pond                                                                                                                        | <b>0.384</b>                        | Spray Drift                                                     | 0.203                                 |
| D4 stream                                                                                                                      | 2.36                                | Spray Drift                                                     | 0.223                                 |
| D5 pond                                                                                                                        | <b>0.417</b>                        | Spray Drift                                                     | 0.140                                 |
| D5 stream                                                                                                                      | 2.59                                | Spray Drift                                                     | 0.413                                 |
| R1 pond                                                                                                                        | <b>0.388</b>                        | Spray Drift                                                     | 0.162                                 |
| R1 stream                                                                                                                      | 1.856                               | Spray Drift                                                     | 0.220                                 |
| R2 stream                                                                                                                      | 2.49                                | Spray Drift                                                     | 0.151                                 |
| R3 stream                                                                                                                      | 2.59                                | Spray Drift                                                     | 0.322                                 |
| R4 stream                                                                                                                      | 1.856                               | Spray Drift                                                     | 0.218                                 |

| <b>POME FRUIT</b><br>Single late application<br>(750 g/ha)<br>Deg50 <sub>wat</sub> = 0.28 d<br>Deg50 <sub>sed</sub> = 1000 d |                                     | <b>No spray buffer = 20 m</b><br><b>Vegetative strip = 20 m</b> |                                       |
|------------------------------------------------------------------------------------------------------------------------------|-------------------------------------|-----------------------------------------------------------------|---------------------------------------|
| <b>FOCUS Step 4 Scenario</b>                                                                                                 | <b>Max. PEC<sub>sw</sub> [µg/L]</b> | <b>Dominant entry route *</b>                                   | <b>Max. PEC<sub>sed</sub> [µg/kg]</b> |
| D3 ditch                                                                                                                     | 2.57                                | Spray Drift                                                     | 0.704                                 |
| D4 pond                                                                                                                      | 0.356                               | Spray Drift                                                     | 0.138                                 |
| D4 stream                                                                                                                    | 2.88                                | Spray Drift                                                     | 0.230                                 |
| D5 pond                                                                                                                      | 0.356                               | Spray Drift                                                     | 0.103                                 |
| D5 stream                                                                                                                    | 3.21                                | Spray Drift                                                     | 0.550                                 |
| R1 pond                                                                                                                      | 0.357                               | Spray Drift                                                     | 0.126                                 |
| R1 stream                                                                                                                    | 2.29                                | Spray Drift                                                     | 0.289                                 |
| R2 stream                                                                                                                    | 3.07                                | Spray Drift                                                     | 0.204                                 |

|                                                                                                                              |                                                                 |                               |                                                 |
|------------------------------------------------------------------------------------------------------------------------------|-----------------------------------------------------------------|-------------------------------|-------------------------------------------------|
| <b>POME FRUIT</b><br>Single late application<br>(750 g/ha)<br>Deg50 <sub>wat</sub> = 0.28 d<br>Deg50 <sub>sed</sub> = 1000 d | <b>No spray buffer = 20 m</b><br><b>Vegetative strip = 20 m</b> |                               |                                                 |
| <b>FOCUS Step 4 Scenario</b>                                                                                                 | <b>Max. PEC<sub>sw</sub></b><br><b>[µg/L]</b>                   | <b>Dominant entry route *</b> | <b>Max. PEC<sub>sed</sub></b><br><b>[µg/kg]</b> |
| R3 stream                                                                                                                    | 3.21                                                            | Spray Drift                   | 0.554                                           |
| R4 stream                                                                                                                    | 2.29                                                            | Spray Drift                   | 0.869                                           |

|                                                                                                                              |                                                                 |                             |                                                 |
|------------------------------------------------------------------------------------------------------------------------------|-----------------------------------------------------------------|-----------------------------|-------------------------------------------------|
| <b>POME FRUIT</b><br>Single late application<br>(750 g/ha)<br>Deg50 <sub>wat</sub> = 1000 d<br>Deg50 <sub>sed</sub> = 0.28 d | <b>No spray buffer = 20 m</b><br><b>Vegetative strip = 20 m</b> |                             |                                                 |
| <b>Scenario FOCUS</b>                                                                                                        | <b>Max. PEC<sub>sw</sub></b><br><b>[µg/L]</b>                   | <b>Dominant entry route</b> | <b>Max. PEC<sub>sed</sub></b><br><b>[µg/kg]</b> |
| D3 ditch                                                                                                                     | 2.57                                                            | Spray Drift                 | 0.731                                           |
| D4 pond                                                                                                                      | <b>0.361</b>                                                    | Spray Drift                 | 0.165                                           |
| D4 stream                                                                                                                    | 2.89                                                            | Spray Drift                 | 0.217                                           |
| D5 pond                                                                                                                      | <b>0.361</b>                                                    | Spray Drift                 | 0.121                                           |
| D5 stream                                                                                                                    | 3.21                                                            | Spray Drift                 | 0.508                                           |
| R1 pond                                                                                                                      | <b>0.361</b>                                                    | Spray Drift                 | 0.150                                           |
| R1 stream                                                                                                                    | 2.29                                                            | Spray Drift                 | 0.271                                           |
| R2 stream                                                                                                                    | 3.08                                                            | Spray Drift                 | 0.187                                           |
| R3 stream                                                                                                                    | 3.21                                                            | Spray Drift                 | 0.397                                           |
| R4 stream                                                                                                                    | 2.29                                                            | Spray Drift                 | 0.294                                           |

|                                                                                                                                 |                                                                 |                             |                                                 |
|---------------------------------------------------------------------------------------------------------------------------------|-----------------------------------------------------------------|-----------------------------|-------------------------------------------------|
| <b>POME FRUIT</b><br>Multiple early application<br>(500 g/ha)<br>Deg50 <sub>wat</sub> = 0.28 d<br>Deg50 <sub>sed</sub> = 1000 d | <b>No spray buffer = 20 m</b><br><b>Vegetative strip = 20 m</b> |                             |                                                 |
| <b>FOCUS Step 4 Scenario</b>                                                                                                    | <b>Max. PEC<sub>sw</sub></b><br><b>[µg/L]</b>                   | <b>Dominant entry route</b> | <b>Max. PEC<sub>sed</sub></b><br><b>[µg/kg]</b> |
| D3 ditch                                                                                                                        | 1.381                                                           | Spray Drift                 | 0.379                                           |

| <b>POME FRUIT</b><br>Multiple early application<br>(500 g/ha)<br>Deg50 <sub>wat</sub> = 0.28 d<br>Deg50 <sub>sed</sub> = 1000 d |                                     | <b>No spray buffer = 20 m</b><br><b>Vegetative strip = 20 m</b> |                                       |
|---------------------------------------------------------------------------------------------------------------------------------|-------------------------------------|-----------------------------------------------------------------|---------------------------------------|
| <b>FOCUS Step 4 Scenario</b>                                                                                                    | <b>Max. PEC<sub>sw</sub> [µg/L]</b> | <b>Dominant entry route</b>                                     | <b>Max. PEC<sub>sed</sub> [µg/kg]</b> |
| D4 pond                                                                                                                         | 0.179                               | Spray Drift                                                     | 0.067                                 |
| D4 stream                                                                                                                       | 1.603                               | Spray Drift                                                     | 0.281                                 |
| D5 pond                                                                                                                         | 0.179                               | Spray Drift                                                     | 0.075                                 |
| D5 stream                                                                                                                       | 1.729                               | Spray Drift                                                     | 0.370                                 |
| R1 pond                                                                                                                         | 0.179                               | Spray Drift                                                     | 0.074                                 |
| R1 stream                                                                                                                       | 1.232                               | Spray Drift                                                     | 0.421                                 |
| R2 stream                                                                                                                       | 1.654                               | Spray Drift                                                     | 0.151                                 |
| R3 stream                                                                                                                       | 1.729                               | Spray Drift                                                     | 0.332                                 |
| R4 stream                                                                                                                       | 1.210                               | Spray Drift                                                     | 0.365                                 |

| <b>POME FRUIT</b><br>Multiple early application<br>(500 g/ha)<br>Deg50 <sub>wat</sub> = 1000 d<br>Deg50 <sub>sed</sub> = 0.28 d |                                     | <b>No spray buffer = 20 m</b><br><b>Vegetative strip = 20 m</b> |                                       |
|---------------------------------------------------------------------------------------------------------------------------------|-------------------------------------|-----------------------------------------------------------------|---------------------------------------|
| <b>Scenario FOCUS</b>                                                                                                           | <b>Max. PEC<sub>sw</sub> [µg/L]</b> | <b>Dominant entry route</b>                                     | <b>Max. PEC<sub>sed</sub> [µg/kg]</b> |
| D3 ditch                                                                                                                        | 1.381                               | Spray Drift                                                     | 0.352                                 |
| D4 pond                                                                                                                         | 0.284                               | Spray Drift                                                     | 0.097                                 |
| D4 stream                                                                                                                       | 1.603                               | Spray Drift                                                     | 0.219                                 |
| D5 pond                                                                                                                         | 0.282                               | Spray Drift                                                     | 0.106                                 |
| D5 stream                                                                                                                       | 1.729                               | Spray Drift                                                     | 0.297                                 |
| R1 pond                                                                                                                         | 0.284                               | Spray Drift                                                     | 0.106                                 |
| R1 stream                                                                                                                       | 1.237                               | Spray Drift                                                     | 0.176                                 |
| R2 stream                                                                                                                       | 1.656                               | Spray Drift                                                     | 0.109                                 |
| R3 stream                                                                                                                       | 1.729                               | Spray Drift                                                     | 0.257                                 |

|                                                                                                                                 |                                               |                                                                 |                                                 |
|---------------------------------------------------------------------------------------------------------------------------------|-----------------------------------------------|-----------------------------------------------------------------|-------------------------------------------------|
| <b>POME FRUIT</b><br>Multiple early application<br>(500 g/ha)<br>Deg50 <sub>wat</sub> = 1000 d<br>Deg50 <sub>sed</sub> = 0.28 d |                                               | <b>No spray buffer = 20 m</b><br><b>Vegetative strip = 20 m</b> |                                                 |
| <b>Scenario</b><br><b>FOCUS</b>                                                                                                 | <b>Max. PEC<sub>sw</sub></b><br><b>[µg/L]</b> | <b>Dominant entry route</b>                                     | <b>Max. PEC<sub>sed</sub></b><br><b>[µg/kg]</b> |
| R4 stream                                                                                                                       | 1.212                                         | Spray Drift                                                     | 0.197                                           |

|                                                                                                                               |                                               |                                                                 |                                                 |
|-------------------------------------------------------------------------------------------------------------------------------|-----------------------------------------------|-----------------------------------------------------------------|-------------------------------------------------|
| <b>POME FRUIT</b><br>Single early application<br>(500 g/ha)<br>Deg50 <sub>wat</sub> = 0.28 d<br>Deg50 <sub>sed</sub> = 1000 d |                                               | <b>No spray buffer = 20 m</b><br><b>Vegetative strip = 20 m</b> |                                                 |
| <b>FOCUS Step 4 Scenario</b>                                                                                                  | <b>Max. PEC<sub>sw</sub></b><br><b>[µg/L]</b> | <b>Dominant entry route</b>                                     | <b>Max. PEC<sub>sed</sub></b><br><b>[µg/kg]</b> |
| D3 ditch                                                                                                                      | 1.709                                         | Spray Drift                                                     | 0.421                                           |
| D4 pond                                                                                                                       | 0.237                                         | Spray Drift                                                     | 0.070                                           |
| D4 stream                                                                                                                     | 1.981                                         | Spray Drift                                                     | 0.282                                           |
| D5 pond                                                                                                                       | 0.237                                         | Spray Drift                                                     | 0.076                                           |
| D5 stream                                                                                                                     | 2.14                                          | Spray Drift                                                     | 0.383                                           |
| R1 pond                                                                                                                       | 0.238                                         | Spray Drift                                                     | 0.076                                           |
| R1 stream                                                                                                                     | 1.524                                         | Spray Drift                                                     | 0.325                                           |
| R2 stream                                                                                                                     | 2.04                                          | Spray Drift                                                     | 0.144                                           |
| R3 stream                                                                                                                     | 2.141                                         | Spray Drift                                                     | 0.508                                           |
| R4 stream                                                                                                                     | 1.495                                         | Spray Drift                                                     | 0.121                                           |

| <b>POME FRUIT</b><br>Single early application<br>(500 g/ha)<br>Deg50 <sub>wat</sub> = 1000 d<br>Deg50 <sub>sed</sub> = 0.28 d |                                     | <b>No spray buffer = 20 m</b><br><b>Vegetative strip = 20 m</b> |                                       |  |
|-------------------------------------------------------------------------------------------------------------------------------|-------------------------------------|-----------------------------------------------------------------|---------------------------------------|--|
| Scenario<br>FOCUS                                                                                                             | Max.<br>PEC <sub>sw</sub><br>[µg/L] | Dominant<br>entry route                                         | Max.<br>PEC <sub>sed</sub><br>[µg/kg] |  |
| D3 ditch                                                                                                                      | 1.709                               | Spray Drift                                                     | 0.431                                 |  |
| D4 pond                                                                                                                       | 0.24                                | Spray Drift                                                     | 0.082                                 |  |
| D4 stream                                                                                                                     | 1.982                               | Spray Drift                                                     | 0.259                                 |  |
| D5 pond                                                                                                                       | 0.240                               | Spray Drift                                                     | 0.103                                 |  |
| D5 stream                                                                                                                     | 2.14                                | Spray Drift                                                     | 0.366                                 |  |
| R1 pond                                                                                                                       | 0.240                               | Spray Drift                                                     | 0.089                                 |  |
| R1 stream                                                                                                                     | 1.527                               | Spray Drift                                                     | 0.175                                 |  |
| R2 stream                                                                                                                     | 2.05                                | Spray Drift                                                     | 0.134                                 |  |
| R3 stream                                                                                                                     | 2.14                                | Spray Drift                                                     | 0.316                                 |  |
| R4 stream                                                                                                                     | 1.497                               | Spray Drift                                                     | 0.197                                 |  |

| <b>POME FRUIT</b><br>Multiple late application<br>(500 g/ha)<br>Deg50 <sub>wat</sub> = 0.28 d<br>Deg50 <sub>sed</sub> = 1000 d |                                     | <b>No spray buffer = 20 m</b><br><b>Vegetative strip = 20 m</b> |                                       |  |
|--------------------------------------------------------------------------------------------------------------------------------|-------------------------------------|-----------------------------------------------------------------|---------------------------------------|--|
| FOCUS Step 4<br>Scenario                                                                                                       | Max.<br>PEC <sub>sw</sub><br>[µg/L] | Dominant<br>entry<br>route                                      | Max.<br>PEC <sub>sed</sub><br>[µg/kg] |  |
| D3 ditch                                                                                                                       | 1.385                               | Spray<br>Drift                                                  | 0.442                                 |  |
| D4 pond                                                                                                                        | 0.179                               | Spray<br>Drift                                                  | 0.083                                 |  |
| D4 stream                                                                                                                      | 1.573                               | Spray<br>Drift                                                  | 0.181                                 |  |
| D5 pond                                                                                                                        | 0.179                               | Spray<br>Drift                                                  | 0.065                                 |  |
| D5 stream                                                                                                                      | 1.729                               | Spray<br>Drift                                                  | 0.353                                 |  |
| R1 pond                                                                                                                        | 0.179                               | Spray<br>Drift                                                  | 0.077                                 |  |
| R1 stream                                                                                                                      | 1.232                               | Spray<br>Drift                                                  | 0.181                                 |  |
| R2 stream                                                                                                                      | 1.656                               | Spray<br>Drift                                                  | 0.130                                 |  |

|                                                                                                                                |                                                                 |                             |                                       |
|--------------------------------------------------------------------------------------------------------------------------------|-----------------------------------------------------------------|-----------------------------|---------------------------------------|
| <b>POME FRUIT</b><br>Multiple late application<br>(500 g/ha)<br>Deg50 <sub>wat</sub> = 0.28 d<br>Deg50 <sub>sed</sub> = 1000 d | <b>No spray buffer = 20 m</b><br><b>Vegetative strip = 20 m</b> |                             |                                       |
| <b>FOCUS Step 4 Scenario</b>                                                                                                   | <b>Max. PEC<sub>sw</sub> [µg/L]</b>                             | <b>Dominant entry route</b> | <b>Max. PEC<sub>sed</sub> [µg/kg]</b> |
| R3 stream                                                                                                                      | 1.729                                                           | Spray Drift                 | 0.407                                 |
| R4 stream                                                                                                                      | 1.231                                                           | Spray Drift                 | 0.364                                 |

|                                                                                                                                |                                                                 |                             |                                       |
|--------------------------------------------------------------------------------------------------------------------------------|-----------------------------------------------------------------|-----------------------------|---------------------------------------|
| <b>POME FRUIT</b><br>Multiple late application<br>(500 g/ha)<br>Deg50 <sub>wat</sub> = 1000 d<br>Deg50 <sub>sed</sub> = 0.28 d | <b>No spray buffer = 20 m</b><br><b>Vegetative strip = 20 m</b> |                             |                                       |
| <b>Scenario FOCUS</b>                                                                                                          | <b>Max. PEC<sub>sw</sub> [µg/L]</b>                             | <b>Dominant entry route</b> | <b>Max. PEC<sub>sed</sub> [µg/kg]</b> |
| D3 ditch                                                                                                                       | 1.385                                                           | Spray Drift                 | 0.401                                 |
| D4 pond                                                                                                                        | 0.255                                                           | Spray Drift                 | 0.136                                 |
| D4 stream                                                                                                                      | 1.575                                                           | Spray Drift                 | 0.149                                 |
| D5 pond                                                                                                                        | 0.278                                                           | Spray Drift                 | 0.094                                 |
| D5 stream                                                                                                                      | 1.729                                                           | Spray Drift                 | 0.276                                 |
| R1 pond                                                                                                                        | 0.258                                                           | Spray Drift                 | 0.109                                 |
| R1 stream                                                                                                                      | 1.238                                                           | Spray Drift                 | 0.147                                 |
| R2 stream                                                                                                                      | 1.661                                                           | Spray Drift                 | 0.101                                 |
| R3 stream                                                                                                                      | 1.730                                                           | Spray Drift                 | 0.215                                 |
| R4 stream                                                                                                                      | 1.237                                                           | Spray Drift                 | 0.141                                 |

| <b>POME FRUIT</b><br>Single late application<br>(500 g/ha)<br>Deg50 <sub>wat</sub> = 0.28 d<br>Deg50 <sub>sed</sub> = 1000 d |                                     | <b>No spray buffer = 20 m</b><br><b>Vegetative strip = 20 m</b> |                                       |
|------------------------------------------------------------------------------------------------------------------------------|-------------------------------------|-----------------------------------------------------------------|---------------------------------------|
| <b>FOCUS Step 4 Scenario</b>                                                                                                 | <b>Max. PEC<sub>sw</sub> [µg/L]</b> | <b>Dominant entry route</b>                                     | <b>Max. PEC<sub>sed</sub> [µg/kg]</b> |
| D3 ditch                                                                                                                     | 1.710                               | Spray Drift                                                     | 0.475                                 |
| D4 pond                                                                                                                      | 0.237                               | Spray Drift                                                     | 0.093                                 |
| D4 stream                                                                                                                    | 1.923                               | Spray Drift                                                     | 0.154                                 |
| D5 pond                                                                                                                      | 0.237                               | Spray Drift                                                     | 0.069                                 |
| D5 stream                                                                                                                    | 2.14                                | Spray Drift                                                     | 0.369                                 |
| R1 pond                                                                                                                      | 0.238                               | Spray Drift                                                     | 0.085                                 |
| R1 stream                                                                                                                    | 1.525                               | Spray Drift                                                     | 0.194                                 |
| R2 stream                                                                                                                    | 2.05                                | Spray Drift                                                     | 0.137                                 |
| R3 stream                                                                                                                    | 2.141                               | Spray Drift                                                     | 0.364                                 |
| R4 stream                                                                                                                    | 1.523                               | Spray Drif                                                      | 0.575                                 |

| <b>POME FRUIT</b><br>Single late application<br>(500 g/ha)<br>Deg50 <sub>wat</sub> = 1000 d<br>Deg50 <sub>sed</sub> = 0.28 d |                                     | <b>No spray buffer = 20 m</b><br><b>Vegetative strip = 20 m</b> |                                       |
|------------------------------------------------------------------------------------------------------------------------------|-------------------------------------|-----------------------------------------------------------------|---------------------------------------|
| <b>Scenario FOCUS</b>                                                                                                        | <b>Max. PEC<sub>sw</sub> [µg/L]</b> | <b>Dominant entry route</b>                                     | <b>Max. PEC<sub>sed</sub> [µg/kg]</b> |
| D3 ditch                                                                                                                     | 1.710                               | Spray Drift                                                     | 0.485                                 |
| D4 pond                                                                                                                      | 0.238                               | Spray Drift                                                     | 0.109                                 |
| D4 stream                                                                                                                    | 1.918                               | Spray Drift                                                     | 0.144                                 |
| D5 pond                                                                                                                      | 0.238                               | Spray Drift                                                     | 0.080                                 |
| D5 stream                                                                                                                    | 2.14                                | Spray Drift                                                     | 0.338                                 |
| R1 pond                                                                                                                      | 0.238                               | Spray Drift                                                     | 0.099                                 |
| R1 stream                                                                                                                    | 1.522                               | Spray Drift                                                     | 0.180                                 |
| R2 stream                                                                                                                    | 2.05                                | Spray Drift                                                     | 0.124                                 |



| <b>POME FRUIT</b><br>Single late application<br>(500 g/ha)<br>Deg50 <sub>wat</sub> = 1000 d<br>Deg50 <sub>sed</sub> = 0.28 d |                                     | <b>No spray buffer = 20 m</b><br><b>Vegetative strip = 20 m</b> |                                       |
|------------------------------------------------------------------------------------------------------------------------------|-------------------------------------|-----------------------------------------------------------------|---------------------------------------|
| Scenario<br>FOCUS                                                                                                            | Max.<br>PEC <sub>sw</sub><br>[µg/L] | Dominant<br>entry route                                         | Max.<br>PEC <sub>sed</sub><br>[µg/kg] |
| R3 stream                                                                                                                    | 2.14                                | Spray Drift                                                     | 0.264                                 |
| R4 stream                                                                                                                    | 1.522                               | Spray Drift                                                     | 0.193                                 |

| <b>PEACHES/NECTARINES</b><br>Multiple early application<br>(700 g/ha)<br>Deg50 <sub>wat</sub> = 0.28 d<br>Deg50 <sub>sed</sub> = 1000 d |                                     | <b>No spray buffer = 20 m</b><br><b>Vegetative strip = 20 m</b> |                                       |
|-----------------------------------------------------------------------------------------------------------------------------------------|-------------------------------------|-----------------------------------------------------------------|---------------------------------------|
| FOCUS Step 4 Scenario                                                                                                                   | Max.<br>PEC <sub>sw</sub><br>[µg/L] | Dominant<br>entry<br>route                                      | Max.<br>PEC <sub>sed</sub><br>[µg/kg] |
| D3 ditch                                                                                                                                | 1.933                               | Spray<br>Drift                                                  | 0.547                                 |
| D4 pond                                                                                                                                 | 0.250                               | Spray<br>Drift                                                  | 0.096                                 |
| D4 stream                                                                                                                               | 2.24                                | Spray<br>Drift                                                  | 0.402                                 |
| D5 pond                                                                                                                                 | 0.250                               | Spray<br>Drift                                                  | 0.109                                 |
| D5 stream                                                                                                                               | 2.42                                | Spray<br>Drift                                                  | 0.547                                 |
| R1 pond                                                                                                                                 | 0.252                               | Spray<br>Drift                                                  | 0.109                                 |
| R1 stream                                                                                                                               | 1.725                               | Spray<br>Drift                                                  | 0.448                                 |
| R2 stream                                                                                                                               | 2.32                                | Spray<br>Drift                                                  | 0.419                                 |
| R3 stream                                                                                                                               | 2.42                                | Spray<br>Drift                                                  | 0.694                                 |
| R4 stream                                                                                                                               | 1.724                               | Spray<br>Drift                                                  | 0.299                                 |

| <b>PEACHES/NECTARINES</b>                                                                                  |                                             |                                                   |                                               |
|------------------------------------------------------------------------------------------------------------|---------------------------------------------|---------------------------------------------------|-----------------------------------------------|
| Multiple early application<br>(700 g/ha)<br>Deg50 <sub>wat</sub> = 1000 d<br>Deg50 <sub>sed</sub> = 0.28 d |                                             | No spray buffer = 20 m<br>Vegetative strip = 20 m |                                               |
| <b>Scenario<br/>FOCUS</b>                                                                                  | <b>Max.<br/>PEC<sub>sw</sub><br/>[µg/L]</b> | <b>Dominant<br/>entry<br/>route</b>               | <b>Max.<br/>PEC<sub>sed</sub><br/>[µg/kg]</b> |
| D3 ditch                                                                                                   | 1.932                                       | Spray<br>Drift                                    | 0.491                                         |
| D4 pond                                                                                                    | 0.427                                       | Spray<br>Drift                                    | 0.145                                         |
| D4 stream                                                                                                  | 2.24                                        | Spray<br>Drift                                    | 0.305                                         |
| D5 pond                                                                                                    | 0.452                                       | Spray<br>Drift                                    | 0.168                                         |
| D5 stream                                                                                                  | 2.42                                        | Spray<br>Drift                                    | 0.401                                         |
| R1 pond                                                                                                    | 0.472                                       | Spray<br>Drift                                    | 0.158                                         |
| R1 stream                                                                                                  | 1.732                                       | Spray<br>Drift                                    | 0.224                                         |
| R2 stream                                                                                                  | 2.319                                       | Spray<br>Drift                                    | 0.173                                         |
| R3 stream                                                                                                  | 2.42                                        | Spray<br>Drift                                    | 0.344                                         |
| R4 stream                                                                                                  | 1.732                                       | Spray<br>Drift                                    | 0.182                                         |

| <b>PEACHES/NECTARINES</b>                                                                                |                                             |                                                   |                                               |
|----------------------------------------------------------------------------------------------------------|---------------------------------------------|---------------------------------------------------|-----------------------------------------------|
| Single early application<br>(700 g/ha)<br>Deg50 <sub>wat</sub> = 0.28 d<br>Deg50 <sub>sed</sub> = 1000 d |                                             | No spray buffer = 20 m<br>Vegetative strip = 20 m |                                               |
| <b>FOCUS Step 4 Scenario</b>                                                                             | <b>Max.<br/>PEC<sub>sw</sub><br/>[µg/L]</b> | <b>Dominant<br/>entry<br/>route</b>               | <b>Max.<br/>PEC<sub>sed</sub><br/>[µg/kg]</b> |
| D3 ditch                                                                                                 | 2.39                                        | Spray<br>Drift                                    | 0.585                                         |
| D4 pond                                                                                                  | 0.332                                       | Spray<br>Drift                                    | 0.097                                         |
| D4 stream                                                                                                | 2.78                                        | Spray<br>Drift                                    | 0.394                                         |
| D5 pond                                                                                                  | 0.332                                       | Spray<br>Drift                                    | 0.106                                         |
| D5 stream                                                                                                | 3.00                                        | Spray<br>Drift                                    | 0.535                                         |

| <b>PEACHES/NECTARINES</b>                                                                                |                                     |                                                   |                                       |
|----------------------------------------------------------------------------------------------------------|-------------------------------------|---------------------------------------------------|---------------------------------------|
| Single early application<br>(700 g/ha)<br>Deg50 <sub>wat</sub> = 0.28 d<br>Deg50 <sub>sed</sub> = 1000 d |                                     | No spray buffer = 20 m<br>Vegetative strip = 20 m |                                       |
| <b>FOCUS Step 4 Scenario</b>                                                                             | <b>Max. PEC<sub>sw</sub> [µg/L]</b> | <b>Dominant entry route</b>                       | <b>Max. PEC<sub>sed</sub> [µg/kg]</b> |
| R1 pond                                                                                                  | 0.333                               | Spray Drift                                       | 0.106                                 |
| R1 stream                                                                                                | 2.13                                | Spray Drift                                       | 0.459                                 |
| R2 stream                                                                                                | 2.86                                | Spray Drift                                       | 0.201                                 |
| R3 stream                                                                                                | 3.00                                | Spray Drift                                       | 0.719                                 |
| R4 stream                                                                                                | 2.10                                | Spray Drift                                       | 0.169                                 |

| <b>PEACHES/NECTARINES</b>                                                                                |                                     |                                                   |                                       |
|----------------------------------------------------------------------------------------------------------|-------------------------------------|---------------------------------------------------|---------------------------------------|
| Single early application<br>(700 g/ha)<br>Deg50 <sub>wat</sub> = 1000 d<br>Deg50 <sub>sed</sub> = 0.28 d |                                     | No spray buffer = 20 m<br>Vegetative strip = 20 m |                                       |
| <b>Scenario FOCUS</b>                                                                                    | <b>Max. PEC<sub>sw</sub> [µg/L]</b> | <b>Dominant entry route</b>                       | <b>Max. PEC<sub>sed</sub> [µg/kg]</b> |
| D3 ditch                                                                                                 | 2.39                                | Spray Drift                                       | 0.602                                 |
| D4 pond                                                                                                  | 0.337                               | Spray Drift                                       | 0.115                                 |
| D4 stream                                                                                                | 2.78                                | Spray Drift                                       | 0.362                                 |
| D5 pond                                                                                                  | 0.337                               | Spray Drift                                       | 0.125                                 |
| D5 stream                                                                                                | 3.00                                | Spray Drift                                       | 0.494                                 |
| R1 pond                                                                                                  | 0.337                               | Spray Drift                                       | 0.123                                 |
| R1 stream                                                                                                | 2.14                                | Spray Drift                                       | 0.245                                 |
| R2 stream                                                                                                | 2.87                                | Spray Drift                                       | 0.188                                 |
| R3 stream                                                                                                | 3.00                                | Spray Drift                                       | 0.424                                 |
| R4 stream                                                                                                | 2.10                                | Spray Drift                                       | 0.160                                 |

| <b>PEACHES/NECTARINES</b>                                                                                 |                                     |                                                   |                                       |
|-----------------------------------------------------------------------------------------------------------|-------------------------------------|---------------------------------------------------|---------------------------------------|
| Multiple late application<br>(700 g/ha)<br>Deg50 <sub>wat</sub> = 0.28 d<br>Deg50 <sub>sed</sub> = 1000 d |                                     | No spray buffer = 20 m<br>Vegetative strip = 20 m |                                       |
| <b>FOCUS Step 4 Scenario</b>                                                                              | <b>Max. PEC<sub>sw</sub> [µg/L]</b> | <b>Dominant entry route</b>                       | <b>Max. PEC<sub>sed</sub> [µg/kg]</b> |
| D3 ditch                                                                                                  | 1.934                               | Spray Drift                                       | 0.937                                 |
| D4 pond                                                                                                   | 0.250                               | Spray Drift                                       | 0.127                                 |
| D4 stream                                                                                                 | 2.20                                | Spray Drift                                       | 0.255                                 |
| D5 pond                                                                                                   | 0.250                               | Spray Drift                                       | 0.102                                 |
| D5 stream                                                                                                 | 2.42                                | Spray Drift                                       | 0.532                                 |
| R1 pond                                                                                                   | 0.251                               | Spray Drift                                       | 0.146                                 |
| R1 stream                                                                                                 | 1.726                               | Spray Drift                                       | 0.272                                 |
| R2 stream                                                                                                 | 2.32                                | Spray Drift                                       | 0.180                                 |
| R3 stream                                                                                                 | 2.42                                | Spray Drift                                       | 0.491                                 |
| R4 stream                                                                                                 | 1.724                               | Spray Drift                                       | 1.552                                 |

| <b>PEACHES/NECTARINES</b>                                                                                 |                                     |                                                   |                                       |
|-----------------------------------------------------------------------------------------------------------|-------------------------------------|---------------------------------------------------|---------------------------------------|
| Multiple late application<br>(700 g/ha)<br>Deg50 <sub>wat</sub> = 1000 d<br>Deg50 <sub>sed</sub> = 0.28 d |                                     | No spray buffer = 20 m<br>Vegetative strip = 20 m |                                       |
| <b>Scenario FOCUS</b>                                                                                     | <b>Max. PEC<sub>sw</sub> [µg/L]</b> | <b>Dominant entry route</b>                       | <b>Max. PEC<sub>sed</sub> [µg/kg]</b> |
| D3 ditch                                                                                                  | 1.933                               | Spray Drift                                       | 0.813                                 |
| D4 pond                                                                                                   | 0.411                               | Spray Drift                                       | 0.217                                 |
| D4 stream                                                                                                 | 2.21                                | Spray Drift                                       | 0.208                                 |
| D5 pond                                                                                                   | 0.446                               | Spray Drift                                       | 0.160                                 |
| D5 stream                                                                                                 | 2.42                                | Spray Drift                                       | 0.396                                 |
| R1 pond                                                                                                   | 0.401                               | Spray Drift                                       | 0.231                                 |
| R1 stream                                                                                                 | 1.733                               | Spray Drift                                       | 0.220                                 |
| R2 stream                                                                                                 | 2.33                                | Spray Drift                                       | 0.146                                 |

| <b>PEACHES/NECTARINES</b>                                                                                 |                                     |                                                   |                                       |
|-----------------------------------------------------------------------------------------------------------|-------------------------------------|---------------------------------------------------|---------------------------------------|
| Multiple late application<br>(700 g/ha)<br>Deg50 <sub>wat</sub> = 1000 d<br>Deg50 <sub>sed</sub> = 0.28 d |                                     | No spray buffer = 20 m<br>Vegetative strip = 20 m |                                       |
| Scenario<br>FOCUS                                                                                         | Max.<br>PEC <sub>sw</sub><br>[µg/L] | Dominant<br>entry<br>route                        | Max.<br>PEC <sub>sed</sub><br>[µg/kg] |
| R3 stream                                                                                                 | 2.42                                | Spray Drift                                       | 0.327                                 |
| R4 stream                                                                                                 | 1.732                               | Spray Drift                                       | 0.512                                 |

| <b>PEACHES/NECTARINES</b>                                                                               |                                     |                                                   |                                       |
|---------------------------------------------------------------------------------------------------------|-------------------------------------|---------------------------------------------------|---------------------------------------|
| Single late application<br>(700 g/ha)<br>Deg50 <sub>wat</sub> = 0.28 d<br>Deg50 <sub>sed</sub> = 1000 d |                                     | No spray buffer = 20 m<br>Vegetative strip = 20 m |                                       |
| FOCUS Step 4 Scenario                                                                                   | Max.<br>PEC <sub>sw</sub><br>[µg/L] | Dominant<br>entry<br>route                        | Max.<br>PEC <sub>sed</sub><br>[µg/kg] |
| D3 ditch                                                                                                | 2.39                                | Spray<br>Drift                                    | 0.658                                 |
| D4 pond                                                                                                 | 0.332                               | Spray<br>Drift                                    | 0.129                                 |
| D4 stream                                                                                               | 2.73                                | Spray<br>Drift                                    | 0.274                                 |
| D5 pond                                                                                                 | 0.332                               | Spray<br>Drift                                    | 0.096                                 |
| D5 stream                                                                                               | 3.00                                | Spray<br>Drift                                    | 0.514                                 |
| R1 pond                                                                                                 | 0.333                               | Spray<br>Drift                                    | 0.118                                 |
| R1 stream                                                                                               | 2.14                                | Spray<br>Drift                                    | 0.270                                 |
| R2 stream                                                                                               | 2.87                                | Spray<br>Drift                                    | 0.197                                 |
| R3 stream                                                                                               | 3.00                                | Spray<br>Drift                                    | 0.436                                 |
| R4 stream                                                                                               | 2.13                                | Spray<br>Drift                                    | 0.310                                 |

| <b>PEACHES/NECTARINES</b>                                                                               |                                     |                                                   |                                       |
|---------------------------------------------------------------------------------------------------------|-------------------------------------|---------------------------------------------------|---------------------------------------|
| Single late application<br>(700 g/ha)<br>Deg50 <sub>wat</sub> = 1000 d<br>Deg50 <sub>sed</sub> = 0.28 d |                                     | No spray buffer = 20 m<br>Vegetative strip = 20 m |                                       |
| <b>Scenario FOCUS</b>                                                                                   | <b>Max. PEC<sub>sw</sub> [µg/L]</b> | <b>Dominant entry route</b>                       | <b>Max. PEC<sub>sed</sub> [µg/kg]</b> |
| D3 ditch                                                                                                | 2.39                                | Spray Drift                                       | 0.661                                 |
| D4 pond                                                                                                 | 0.337                               | Spray Drift                                       | 0.179                                 |
| D4 stream                                                                                               | 2.73                                | Spray Drift                                       | 0.257                                 |
| D5 pond                                                                                                 | 0.337                               | Spray Drift                                       | 0.113                                 |
| D5 stream                                                                                               | 3.00                                | Spray Drift                                       | 0.475                                 |
| R1 pond                                                                                                 | 0.337                               | Spray Drift                                       | 0.140                                 |
| R1 stream                                                                                               | 2.14                                | Spray Drift                                       | 0.253                                 |
| R2 stream                                                                                               | 2.87                                | Spray Drift                                       | 0.180                                 |
| R3 stream                                                                                               | 3.00                                | Spray Drift                                       | 0.402                                 |
| R4 stream                                                                                               | 2.14                                | Spray Drift                                       | 0.218                                 |

| <b>POTATOES</b>                                                                                              |                                     |                                                   |                                       |
|--------------------------------------------------------------------------------------------------------------|-------------------------------------|---------------------------------------------------|---------------------------------------|
| Single early application<br>(1 x 500 g/ha)<br>Deg50 <sub>wat</sub> = 0.28 d<br>Deg50 <sub>sed</sub> = 1000 d |                                     | No spray buffer = 20 m<br>Vegetative strip = 20 m |                                       |
| <b>FOCUS Step 4 Scenario</b>                                                                                 | <b>Max. PEC<sub>sw</sub> [µg/L]</b> | <b>Dominant entry route</b>                       | <b>Max. PEC<sub>sed</sub> [µg/kg]</b> |
| D3 ditch                                                                                                     | 0.237                               | Spray Drift                                       | 0.064                                 |
| D4 pond                                                                                                      | 0.045                               | Spray Drift                                       | 0.018                                 |
| D4 stream                                                                                                    | 0.250                               | Spray Drift                                       | 0.009                                 |
| D6 1 <sup>st</sup> crop ditch                                                                                | 0.236                               | Spray Drift                                       | 0.053                                 |
| D6 2 <sup>nd</sup> crop ditch                                                                                | 0.234                               | Spray Drift                                       | 0.038                                 |
| R1 pond                                                                                                      | 0.046                               | Spray Drift                                       | 0.034                                 |
| R1 stream                                                                                                    | 0.710                               | Runoff                                            | 0.492                                 |
| R2 stream                                                                                                    | 0.286                               | Spray Drift                                       | 0.066                                 |
| R3 stream                                                                                                    | 0.860                               | Spray Drift                                       | 0.324                                 |

| <b>POTATOES</b><br>Single early application<br>(1 x 500 g/ha)<br>Deg50 <sub>wat</sub> = 0.28 d<br>Deg50 <sub>sed</sub> = 1000 d |                               |                                                                 |                                 |
|---------------------------------------------------------------------------------------------------------------------------------|-------------------------------|-----------------------------------------------------------------|---------------------------------|
|                                                                                                                                 |                               | <b>No spray buffer = 20 m</b><br><b>Vegetative strip = 20 m</b> |                                 |
| Scenario FOCUS                                                                                                                  | Max. PEC <sub>sw</sub> [µg/L] | Dominant entry route                                            | Max. PEC <sub>sed</sub> [µg/kg] |
| D3 ditch                                                                                                                        | 0.237                         | Spray Drift                                                     | 0.060                           |
| D4 pond                                                                                                                         | 0.050                         | Drainage                                                        | 0.021                           |
| D4 stream                                                                                                                       | 0.250                         | Spray Drift                                                     | 0.009                           |
| D6 1 <sup>st</sup> crop ditch                                                                                                   | 0.236                         | Spray Drift                                                     | 0.049                           |
| D6 2 <sup>nd</sup> crop ditch                                                                                                   | 0.234                         | Spray Drift                                                     | 0.033                           |
| R1 pond                                                                                                                         | 0.112                         | Runoff                                                          | 0.042                           |
| R1 stream                                                                                                                       | 0.722                         | Runoff                                                          | 0.282                           |
| R2 stream                                                                                                                       | 0.287                         | Spray Drift                                                     | 0.045                           |
| R3 stream                                                                                                                       | 0.894                         | Spray Drift                                                     | 0.214                           |

| <b>POTATOES</b><br>Single late application<br>(1 x 500 g/ha)<br>Deg50 <sub>wat</sub> = 0.28 d<br>Deg50 <sub>sed</sub> = 1000 d |                               |                                                                 |                                 |
|--------------------------------------------------------------------------------------------------------------------------------|-------------------------------|-----------------------------------------------------------------|---------------------------------|
|                                                                                                                                |                               | <b>No spray buffer = 20 m</b><br><b>Vegetative strip = 20 m</b> |                                 |
| FOCUS Step 4 Scenario                                                                                                          | Max. PEC <sub>sw</sub> [µg/L] | Dominant entry route                                            | Max. PEC <sub>sed</sub> [µg/kg] |
| D3 ditch                                                                                                                       | 0.237                         | Spray Drift                                                     | 0.057                           |
| D4 pond                                                                                                                        | 0.045                         | Spray Drift                                                     | 0.015                           |
| D4 stream                                                                                                                      | 0.230                         | Spray Drift                                                     | 0.006                           |
| D6 1 <sup>st</sup> crop ditch                                                                                                  | 0.235                         | Spray Drift                                                     | 0.039                           |
| D6 2 <sup>nd</sup> crop ditch                                                                                                  | 5.05                          | Drainage                                                        | 1.034                           |
| R1 pond                                                                                                                        | 0.045                         | Spray Drift                                                     | 0.015                           |
| R1 stream                                                                                                                      | 0.213                         | Spray Drift                                                     | 0.027                           |
| R2 stream                                                                                                                      | 0.288                         | Spray Drift                                                     | 0.131                           |
| R3 stream                                                                                                                      | 0.237                         | Spray Drift                                                     | 0.057                           |

| <b>POTATOES</b><br>Single early application<br>(1 x 500 g/ha)<br>Deg50 <sub>wat</sub> = 0.28 d<br>Deg50 <sub>sed</sub> = 1000 d |                               | <b>No spray buffer = 20 m</b><br><b>Vegetative strip = 20 m</b> |                                 |
|---------------------------------------------------------------------------------------------------------------------------------|-------------------------------|-----------------------------------------------------------------|---------------------------------|
| Scenario FOCUS                                                                                                                  | Max. PEC <sub>sw</sub> [µg/L] | Dominant entry route                                            | Max. PEC <sub>sed</sub> [µg/kg] |
| D3 ditch                                                                                                                        | 0.237                         | Spray Drift                                                     | 0.056                           |
| D4 pond                                                                                                                         | 0.048                         | Drainage                                                        | 0.020                           |
| D4 stream                                                                                                                       | 0.230                         | Spray Drift                                                     | 0.005                           |
| D6 1 <sup>st</sup> crop ditch                                                                                                   | 0.235                         | Spray Drift                                                     | 0.036                           |
| D6 2 <sup>nd</sup> crop ditch                                                                                                   | 1.576                         | Drainage                                                        | 0.415                           |
| R1 pond                                                                                                                         | 0.048                         | Runoff                                                          | 0.017                           |
| R1 stream                                                                                                                       | 0.215                         | Spray Drift                                                     | 0.025                           |
| R2 stream                                                                                                                       | 0.288                         | Spray Drift                                                     | 0.084                           |
| R3 stream                                                                                                                       | 0.476                         | Runoff                                                          | 0.116                           |





## Ecotoxicology

Effects on birds and other terrestrial vertebrates (Regulation (EU) N° 283/2013, Annex Part A, point 8.1 and Regulation (EU) N° 284/2013, Annex Part A, point 10.1)

| Species                         | Test substance                                  | Time scale | End point        | Toxicity (mg/kg bw per day) |
|---------------------------------|-------------------------------------------------|------------|------------------|-----------------------------|
| <b>Birds</b>                    |                                                 |            |                  |                             |
| <i>Mallard duck</i>             | a.s. Imidan technical (95.4%)                   | Acute      | LD <sub>50</sub> | 2065                        |
| <i>Mallard duck</i>             | a.s. Phosmet Technical (96.2%)                  | Acute      | LD <sub>50</sub> | 1068                        |
|                                 |                                                 |            | Geometric mean   | 1485                        |
| <i>Bobwhite quail</i>           | a.s. Phosmet Technical (97%)                    | Acute      | LD <sub>50</sub> | 56.25                       |
|                                 |                                                 |            | Geometric mean   | <b>289*</b>                 |
| <i>Mallard duck</i>             | a.s. Phosmet (97%)                              | Short-term | LD <sub>50</sub> | > 2321                      |
| <i>Bobwhite quail</i>           | a.s. Imidan Technical (No purity indicated)     | Long-term  | NOEC             | 7.5                         |
| <i>Mallard duck</i>             | a.s. Imidan Technical (No purity indicated)     | Long-term  | NOEC             | <b>5.33*</b>                |
| <b>Mammals</b>                  |                                                 |            |                  |                             |
| <i>Rat</i>                      | a.s.                                            | Acute      | LD <sub>50</sub> | 113                         |
| <i>Rat</i>                      | a.s. WP formulation containing 500 g/kg Phosmet | Acute      | LD <sub>50</sub> | 230                         |
|                                 |                                                 |            | Geometric mean   | <b>161*</b>                 |
| <i>Rat (2 generation study)</i> | a.s.                                            | Long-term  | NOAEL            | ■                           |

**Endocrine disrupting properties (Annex Part A, points 8.1.5)**

Several hazard-related experimental data have been provided in the toxicology section. These experimental data lead to the following conclusion:

*According to the mammalian toxicology data package, phosmet does not fulfil the ED criteria for humans. This conclusion also applies to wild mammals. Effects in thyroid histopathology were not reported and a pattern of adversity through the EAS-modalities was not observed. Information in the endocrine activity was negative and sufficiently investigated. The critical effect identified was plasma red blood cell and brain Cholinesterase inhibition. Based on this, apical effects will take place before an effect through an ED mode of action. No further testing was considered necessary, although the dataset was incomplete for the EAS mediated adversity.*

*For non-target organism, regarding the T-modality, one AMA according to OECD TG 231 is available. It was noted that there is an effect on development but without effects on thyroid histopathology, therefore this is not considered ED mediated effects.*

*Overall, experts concluded that the substance does not meet the criteria for the T modality for non-target organisms.*

*For the EAS modalities a FSTRA according to OECD TG 229 was available. Effects on VTG changes in males, SSC in male and effects on gonad histopathology are reported at the second dose tested (9.3 µg/L). Effects in females were reported in gonad histopathology (GSI) but in absence of VTG changes in females. At the same dose where these effects were observed, a 25% combined mortality is reported, therefore these effects are very likely to be the results of systemic toxicity. A 25% mortality in female is even reported at the lowest dose tested of 1 µg/L.*

*Considering the information from the mam tox section that supports the presence of effects secondary to systemic toxicity, it is not possible to conclude that the endocrine mode of action is the primary mode of action, but that endocrine related effects can be secondary to systemic toxicity.*

*The majority of the experts agreed that the substance does not meet the criteria for EAS modalities.*

***Overall, the experts at the meeting agreed that phosmet does not meet the ED criteria for non-target organisms.***

Additional higher tier studies (Annex Part A, points 10.1.1.2):

The qualitative and quantitative composition of the bird community in stone fruit orchards in Spain in spring and summer (Study B.9.1.1.2/01) and in citrus orchards (Study B.9.1.1.2/02) were investigated. During the commenting period a published paper assessing focal species of birds in European crops (Study B.9.1.1.2/03) was also provided.

Furthermore, a study was presented to obtain information on the occurrence of wild small mammals in orchards in Southern Europe (Spain) during summer to determine the relevant species and, if abundant, their habitat preference (Study B.9.1.2.2/01).

Furthermore, an extensive dataset of Phosmet specific residues in fruits were also provided during the commenting period and used for the refinement of the risk to frugivorous mammals.

Terrestrial vertebrate wildlife (birds, mammals, reptile and amphibians) (Annex Part A, points 8.1.4, 10.1.3):

*No data submitted. And statement has been provided. Please, refer to Vol 3 CA B.9.1.4.*

\*Ecotoxicology relevant endpoint.

## Toxicity/exposure ratios for terrestrial vertebrates (Regulation (EU) N° 284/2013, Part A, Annex point 10.1)

### Birds

#### Acute risk

#### Screening step

| Crop                                  | Indicator Species        | Application Rate [kg a.s./ha] | MAF (90 <sup>th</sup> perc.) | Short cut Value (90 <sup>th</sup> perc. RUD) | Daily Dietary Dose [mg a.s./kg bw] | TER <sub>A</sub> | Trigger |
|---------------------------------------|--------------------------|-------------------------------|------------------------------|----------------------------------------------|------------------------------------|------------------|---------|
| <b>Representative uses in the SEZ</b> |                          |                               |                              |                                              |                                    |                  |         |
| Citrus                                | Small insectivorous bird | 0.5                           | 1.0                          | 46.8                                         | 23.40                              | 12.35            | 10      |
| Peaches/Nectarines                    |                          | 0.7                           | 1.3                          | 46.8                                         | 42.59                              | <b>6.79</b>      |         |
| Pome fruit                            |                          | 0.75                          | 1.147                        | 46.8                                         | 40.26                              | <b>7.18</b>      |         |
| <b>Representative uses in the CEZ</b> |                          |                               |                              |                                              |                                    |                  |         |
| Pome fruit                            | Small insectivorous bird | 0.5                           | 1.147                        | 46.8                                         | 26.84                              | 10.77            | 10      |
| Potatoes                              | Small omnivorous bird    | 0.5                           | 1.0                          | 158.8                                        | 79.40                              | <b>3.64</b>      |         |

LD<sub>50</sub> = 289 mg a.s./kg bw (geometric mean)

MAF = multiple application factor, RUD = residue unit dose, TER = toxicity exposure ratio

Values in **bold** are below the relevant trigger of 10, indicating high risk

#### Tier I

| Generic focal Species                                | Application Rate [kg a.s./ha] | MAF (90 <sup>th</sup> perc.) | Short cut Value (90 <sup>th</sup> perc. RUD) | Daily Dietary Dose [mg a.s./kg bw] | TER <sub>A</sub> |
|------------------------------------------------------|-------------------------------|------------------------------|----------------------------------------------|------------------------------------|------------------|
| <b>Peaches/Nectarines (BBCH 71 - 85)</b>             |                               |                              |                                              |                                    |                  |
| Small insectiv. bird "Blue tit", Spring, Summer      | 0.7                           | 1.3                          | 46.8                                         | 42.59                              | <b>6.79</b>      |
| Small insectiv./worm feeding bird "Robin", BBCH ≥ 40 |                               |                              | 2.2                                          | 2.00                               | 144.36           |
| Small graniv. bird "Serin", BBCH ≥ 40                |                               |                              | 8.2                                          | 7.46                               | 38.73            |
| <b>Pome fruit SEZ (BBCH 67 - 85)</b>                 |                               |                              |                                              |                                    |                  |
| Small insectiv. bird "Blue tit", Spring, Summer      | 0.75                          | 1.147                        | 46.8                                         | 40.26                              | <b>7.18</b>      |
| Small insectiv./worm feeding bird "Robin", BBCH ≥ 40 |                               |                              | 2.2                                          | 1.89                               | 152.70           |
| Small graniv. bird "Serin", BBCH ≥ 40                |                               |                              | 8.2                                          | 7.05                               | 40.97            |
| <b>Potatoes (BBCH 40 - 49)</b>                       |                               |                              |                                              |                                    |                  |
| Small omniv. bird "Woodlark", BBCH ≥ 40              | 0.5                           | 1.0                          | 7.2                                          | 3.60                               | 80.27            |
| Small insectiv. bird "Wagtail", BBCH ≥ 20            |                               |                              | 25.2                                         | 12.60                              | 22.9             |

LD<sub>50</sub> = 289 mg a.s./kg bw (geometric mean)

MAF = multiple application factor, RUD = residue unit dose, TER = toxicity exposure ratio

Values in **bold** are below the relevant trigger of 10, indicating high risk

### Refined risk assessment

No suitable [redacted] was considered acceptable for either [redacted] or [redacted].  
Great tit considered the small insectivorous focal bird species with a diet of 80 and 20% of foliar and ground arthropods, respectively

| Generic focal Species                            | Application Rate [kg a.s./ha] | MAF (90 <sup>th</sup> perc.) | 90 <sup>th</sup> perc. RUD | FIR/bw | PD    | Deposition Factor | Daily Dietary Dose [mg a.s./kg bw] | TER <sub>A</sub> |
|--------------------------------------------------|-------------------------------|------------------------------|----------------------------|--------|-------|-------------------|------------------------------------|------------------|
| <b>Peaches/Nectarines (BBCH 71 - 85)</b>         |                               |                              |                            |        |       |                   |                                    |                  |
| Small insectiv. bird "Great tit", Spring, Summer | 0.7                           | [redacted]                   | 54.1                       | 0.75*  | 0.8   | 1                 | [redacted]                         |                  |
|                                                  |                               |                              | 13.8                       |        | 0.2** | 0.35              | [redacted]                         |                  |
|                                                  |                               |                              |                            |        |       |                   | [redacted]                         | [redacted]       |
| <b>Pome fruit SEZ (BBCH 67 - 85)</b>             |                               |                              |                            |        |       |                   |                                    |                  |
| Small insectiv. bird "Great tit", Spring, Summer | 0.75                          | [redacted]                   | 54.1                       | 0.75*  | 0.8   | 1                 | [redacted]                         |                  |
|                                                  |                               |                              | 13.8                       |        | 0.2** | 0.35              | [redacted]                         |                  |
|                                                  |                               |                              |                            |        |       |                   | [redacted]                         | [redacted]       |

LD<sub>50</sub> = 289 mg a.s./kg bw (geometric mean)

\* based on a body weight of 19 g (Bird Bible, Buxton et al. 1998) and 100 % arthropods as food

\*\*Proportion of diet foraged on the ground between May and October as used by ANSES and identified by the "Cahier de Agricultures et Oiseaux, Document guide permettant d'identifier les espèces focales d'oiseaux en France pour les grandes cultures, l'arboriculture, la vigne et les cultures légumières – Avril 2012". The underlying publications for the selection of 80% foliar invertebrates and 20% ground invertebrates are Gibb and Betts (1963), Royama (1970), Minot (1981) and Gibb (1954).

Values in **bold** are below the trigger value of 10, indicating high risk

### Chronic risk

#### Tier I risk assessment

| Generic focal Species                                | Application Rate [kg a.s./ha] | MAF (mean) | ftwa | Short cut Value (mean RUD) | Daily Dietary Dose [mg a.s./kg bw] | TER <sub>LT</sub> |
|------------------------------------------------------|-------------------------------|------------|------|----------------------------|------------------------------------|-------------------|
| <b>Citrus (BBCH 79 - 89)</b>                         |                               |            |      |                            |                                    |                   |
| Small insectiv. bird "Blue tit", Spring, Summer      | 0.5                           | 1.0        | 0.53 | 18.2                       | 4.82                               | <b>1.11</b>       |
| Small insectiv./worm feeding bird "Robin", BBCH ≥ 40 |                               |            |      | 0.8                        | 0.21                               | 25.38             |
| Small graniv. bird "Serin", BBCH ≥ 40                |                               |            |      | 3.8                        | 1.01                               | 5.27              |
| <b>Peaches/Nectarines (BBCH 71 - 85)</b>             |                               |            |      |                            |                                    |                   |
| Small insectiv. bird "Blue tit", Spring, Summer      | 0.7                           | 1.5        | 0.53 | 18.2                       | 10.13                              | <b>0.53</b>       |
| Small insectiv./worm feeding bird "Robin", BBCH ≥ 40 |                               |            |      | 0.8                        | 0.45                               | 11.84             |
| Small graniv. bird "Serin", BBCH ≥ 40                |                               |            |      | 3.8                        | 2.11                               | <b>2.53</b>       |
| <b>Pome fruit SEZ (BBCH 67 - 85)</b>                 |                               |            |      |                            |                                    |                   |
| Small insectiv. bird "Blue tit", Spring, Summer      | 0.75                          | 1.25       | 0.53 | 18.2                       | 9.04                               | <b>0.59</b>       |
| Small insectiv./worm feeding bird "Robin", BBCH ≥ 40 |                               |            |      | 0.8                        | 0.40                               | 13.33             |
| Small graniv. bird "Serin", BBCH ≥ 40                |                               |            |      | 3.8                        | 1.89                               | <b>2.82</b>       |

| <b>Pome fruit CEZ (BBCH 67 - 85)</b>                      |     |      |      |      |      |             |
|-----------------------------------------------------------|-----|------|------|------|------|-------------|
| Small insectiv. bird "Blue tit", Spring, Summer           | 0.5 | 1.25 | 0.53 | 18.2 | 6.03 | <b>0.88</b> |
| Small insectiv./worm feeding bird "Robin", BBCH $\geq$ 40 |     |      |      | 0.8  | 0.27 | 19.74       |
| Small graniv. bird "Serin", BBCH $\geq$ 40                |     |      |      | 3.8  | 1.26 | <b>4.23</b> |
| <b>Potatoes (BBCH 40 - 49)</b>                            |     |      |      |      |      |             |
| Small omniv. bird "Woodlark", BBCH $\geq$ 40              | 0.5 | 1.0  | 0.53 | 3.3  | 0.87 | 6.13        |
| Small insectiv. bird "Wagtail", BBCH $\geq$ 20            |     |      |      | 9.7  | 2.57 | <b>2.07</b> |

NOEL = 5.33 mg a.s./kg bw/day

Values in **bold** are below the trigger value of 5, indicating high riskRefined risk assessment

No suitable **█** was considered acceptable for either **█** or **█**.  
PT = 0.79 on Blue tit

| Generic focal Species                           | Application Rate [kg a.s./ha] | MAF (mean) | ftwa     | Short cut Value (mean RUD) | PT   | Daily Dietary Dose [mg a.s./kg bw] | TER <sub>LT</sub> |
|-------------------------------------------------|-------------------------------|------------|----------|----------------------------|------|------------------------------------|-------------------|
| <b>Citrus (BBCH 79 - 89)</b>                    |                               |            |          |                            |      |                                    |                   |
| Small insectiv. bird "Blue tit", Spring, Summer | 0.5                           | 1.0        | <b>█</b> | 18.2                       | 0.79 | <b>█</b>                           | <b>█</b>          |
| <b>Peaches/Nectarines (BBCH 71 - 85)</b>        |                               |            |          |                            |      |                                    |                   |
| Small insectiv. bird "Blue tit", Spring, Summer | 0.7                           | <b>█</b>   | <b>█</b> | 18.2                       | 0.79 | <b>█</b>                           | <b>█</b>          |
| Small graniv. bird "Serin", BBCH $\geq$ 40      |                               |            |          | 3.8                        | 1    | <b>█</b>                           | <b>█</b>          |
| <b>Pome fruit SEZ (BBCH 67 - 85)</b>            |                               |            |          |                            |      |                                    |                   |
| Small insectiv. bird "Blue tit", Spring, Summer | 0.75                          | <b>█</b>   | <b>█</b> | 18.2                       | 0.79 | <b>█</b>                           | <b>█</b>          |
| Small graniv. bird "Serin", BBCH $\geq$ 40      |                               |            |          | 3.8                        | 1    | <b>█</b>                           | <b>█</b>          |
| <b>Pome fruit CEZ (BBCH 67 - 85)</b>            |                               |            |          |                            |      |                                    |                   |
| Small insectiv. bird "Blue tit", Spring, Summer | 0.5                           | <b>█</b>   | <b>█</b> | 18.2                       | 0.79 | <b>█</b>                           | <b>█</b>          |
| Small graniv. bird "Serin", BBCH $\geq$ 40      |                               |            |          | 3.8                        | 1    | <b>█</b>                           | <b>█</b>          |
| <b>Potatoes (BBCH 40 - 49)</b>                  |                               |            |          |                            |      |                                    |                   |
| Small insectiv. bird "Wagtail", BBCH $\geq$ 20  | 0.5                           | 1          | <b>█</b> | 9.7                        | 1    | <b>█</b>                           | <b>█</b>          |

NOEL = 5.33 mg a.s./kg bw/day

Values in **bold** are below the trigger value of 5, indicating high riskMammalsAcute riskTier I

| Generic focal Species                           | Application Rate [kg a.s./ha] | MAF (90 <sup>th</sup> perc.) | Short cut Value (90 <sup>th</sup> perc. RUD) | Daily Dietary Dose [mg a.s./kg bw] | TER <sub>A</sub> |
|-------------------------------------------------|-------------------------------|------------------------------|----------------------------------------------|------------------------------------|------------------|
| <b>Citrus (BBCH 79 - 89)</b>                    |                               |                              |                                              |                                    |                  |
| Small herbivorous mammal, "Vole" BBCH ≥ 40      | 0.5                           | 1.0                          | 40.9                                         | 20.45                              | <b>7.87</b>      |
| Frugivorous mammal, "Dormouse" BBCH 71-79       |                               |                              | 47.9                                         | 23.95                              | <b>6.72</b>      |
| Large herbivorous mammal, "Rabbit" BBCH ≥ 40    |                               |                              | 10.5                                         | 5.25                               | 30.7             |
| Small omnivorous mammal, "Wood mouse" BBCH ≥ 40 |                               |                              | 5.2                                          | 2.60                               | 61.9             |
| <b>Peaches/Nectarines (BBCH 71 - 85)</b>        |                               |                              |                                              |                                    |                  |
| Small herbivorous mammal, "Vole" BBCH ≥ 40      | 0.7                           | 1.3                          | 40.9                                         | 37.22                              | <b>4.33</b>      |
| Frugivorous mammal, "Dormouse" BBCH 71-79       |                               |                              | 47.9                                         | 43.59                              | <b>3.69</b>      |
| Large herbivorous mammal, "Rabbit" BBCH ≥ 40    |                               |                              | 10.5                                         | 9.56                               | 16.8             |
| Small omnivorous mammal, "Wood mouse" BBCH ≥ 40 |                               |                              | 5.2                                          | 4.73                               | 34.0             |
| <b>Pome fruit SEZ (BBCH 67 - 85)</b>            |                               |                              |                                              |                                    |                  |
| Small herbivorous mammal, "Vole" BBCH ≥ 40      | 0.75                          | 1.147                        | 40.9                                         | 35.18                              | <b>4.58</b>      |
| Frugivorous mammal, "Dormouse" BBCH 71-79       |                               |                              | 47.9                                         | 41.20                              | <b>3.91</b>      |
| Large herbivorous mammal, "Rabbit" BBCH ≥ 40    |                               |                              | 10.5                                         | 9.03                               | 17.8             |
| Small omnivorous mammal, "Wood mouse" BBCH ≥ 40 |                               |                              | 5.2                                          | 4.47                               | 36.0             |
| <b>Pome fruit CEZ (BBCH 67 - 85)</b>            |                               |                              |                                              |                                    |                  |
| Small herbivorous mammal, "Vole" BBCH ≥ 40      | 0.5                           | 1.147                        | 40.9                                         | 23.46                              | <b>6.86</b>      |
| Frugivorous mammal, "Dormouse" BBCH 71-79       |                               |                              | 47.9                                         | 27.47                              | <b>5.86</b>      |
| Large herbivorous mammal, "Rabbit" BBCH ≥ 40    |                               |                              | 10.5                                         | 6.02                               | 26.7             |
| Small omnivorous mammal, "Wood mouse" BBCH ≥ 40 |                               |                              | 5.2                                          | 2.98                               | 54.0             |
| <b>Potatoes (BBCH 40 - 49)</b>                  |                               |                              |                                              |                                    |                  |
| Small herbivorous mammal "Vole" BBCH ≥ 40       | 0.5                           | 1.0                          | 40.9                                         | 20.45                              | <b>7.87</b>      |
| Large herbivorous mammal "Rabbit" BBCH 10-40    |                               |                              | 10.5                                         | 5.25                               | 30.7             |
| Small omnivorous mammal "Wood mouse" BBCH ≥ 40  |                               |                              | 5.2                                          | 2.60                               | 61.9             |
| Small insectivorous mammal "Shrew" BBCH ≥ 20    |                               |                              | 5.4                                          | 2.70                               | 59.6             |

LD<sub>50</sub> = 161 mg a.s./kg bw (geometric mean)

MAF = multiple application factor, RUD = residue unit dose, TER = toxicity exposure ratio

Values in **bold** are below the relevant trigger of 10, indicating high risk

### Refined risk assessment

No suitable [redacted] was considered acceptable for either [redacted] or [redacted].

Crop-specific refinement of the RUD for fruits.

The small herbivorous guild must not be disregarded and the refinement using wood mouse as a focal species is not accepted.

| Generic focal Species                      | Application Rate [kg a.s./ha] | MAF* (90 <sup>th</sup> perc.) | 90 <sup>th</sup> perc. RUD | Deposition Factor** | FIR/bw | Daily Dietary Dose [mg a.s./kg bw] | TER <sub>A</sub> |
|--------------------------------------------|-------------------------------|-------------------------------|----------------------------|---------------------|--------|------------------------------------|------------------|
| <b>Citrus (BBCH 79 - 89)</b>               |                               |                               |                            |                     |        |                                    |                  |
| Small herbivorous mammal, "Vole" BBCH ≥ 40 | 0.5                           | 1.0                           | 102.3                      | 0.2                 | 1.33   | 13.61                              | 11.8             |
| Frugivorous mammal, "Dormouse" BBCH 71-79  |                               |                               | 1.429***                   | 1                   | 1.16   | 0.83                               | 194              |
| <b>Peaches/Nectarines (BBCH 71 - 85)</b>   |                               |                               |                            |                     |        |                                    |                  |
| Small herbivorous mammal, "Vole" BBCH ≥ 40 | 0.7                           | ■                             | 102.3                      | 0.35                | 1.33   | ■                                  | ■                |
| Frugivorous mammal, "Dormouse" BBCH 71-79  |                               |                               | 2.690***                   | 1                   | 1.16   | 2.84                               | 56.7             |
| <b>Pome fruit SEZ (BBCH 67 - 85)</b>       |                               |                               |                            |                     |        |                                    |                  |
| Small herbivorous mammal, "Vole" BBCH ≥ 40 | 0.75                          | ■                             | 102.3                      | 0.35                | 1.33   | ■                                  | ■                |
| Frugivorous mammal, "Dormouse" BBCH 71-79  |                               |                               | 2.036***                   | 1                   | 1.16   | 2.03                               | 79.3             |
| <b>Pome fruit CEZ (BBCH 67 - 85)</b>       |                               |                               |                            |                     |        |                                    |                  |
| Small herbivorous mammal, "Vole" BBCH ≥ 40 | 0.5                           | 1.147                         | 102.3                      | 0.35                | 1.33   | 27.31                              | <b>5.89</b>      |
| Frugivorous mammal, "Dormouse" BBCH 71-79  |                               |                               | 2.005***                   | 1                   | 1.16   | 1.33                               | 121              |
| <b>Potatoes (BBCH 40 - 49)</b>             |                               |                               |                            |                     |        |                                    |                  |
| Small herbivorous mammal "Vole" BBCH ≥ 40  | 0.5                           | 1.0                           | 102.3                      | 0.15                | 1.33   | 10.20                              | 15.8             |

LD<sub>50</sub> = 161 mg a.s./kg bw (geometric mean)

\* The default MAF values based on DT<sub>50</sub>=10 days are used for the frugivorous mammal dormouse.

\*\* Deposition factors chosen according to the new "EFSA Guidance Document for evaluating laboratory and field dissipation studies to obtain DegT<sub>50</sub> values of active substances of plant protection products and transformation products of these active substances in soil" (EFSA Journal 2014;12(5):3662).

\*\*\* 90th percentil refined RUD in fruits.

Values in **bold** are below the relevant trigger of 10, indicating high risk

## Mammals

### Long-term risk

#### Tier I

| Generic focal Species                      | Application Rate [kg a.s./ha] | MAF (mean) | ftwa | Short cut Value (mean RUD) | Daily Dietary Dose [mg a.s./kg bw] | TER <sub>LT</sub> |
|--------------------------------------------|-------------------------------|------------|------|----------------------------|------------------------------------|-------------------|
| <b>Citrus (BBCH 79 - 89)</b>               |                               |            |      |                            |                                    |                   |
| Small herbivorous mammal, "Vole" BBCH ≥ 40 | 0.5                           | 1.0        | 0.53 | 21.7                       | 5.72                               | ■                 |
| Frugivorous mammal,                        |                               |            |      | 22.7                       | 5.98                               | ■                 |



|                                                         |      |      |      |      |       |   |
|---------------------------------------------------------|------|------|------|------|-------|---|
| “Dormouse” BBCH 71-79                                   |      |      |      |      |       |   |
| Large herbivorous mammal,<br>“Rabbit”<br>BBCH $\geq$ 40 |      |      |      | 4.3  | 1.13  | ■ |
| Small omnivorous mammal,<br>“Wood mouse” BBCH $\geq$ 40 |      |      |      | 2.3  | 0.61  | ■ |
| <b>Peaches/Nectarines (BBCH 71 - 85)</b>                |      |      |      |      |       |   |
| Small herbivorous mammal,<br>“Vole” BBCH $\geq$ 40      | 0.7  | 1.5  | 0.53 | 21.7 | 12.00 | ■ |
| Frugivorous mammal,<br>“Dormouse” BBCH 71-79            |      |      |      | 22.7 | 12.56 | ■ |
| Large herbivorous mammal,<br>“Rabbit”<br>BBCH $\geq$ 40 |      |      |      | 4.3  | 2.38  | ■ |
| Small omnivorous mammal,<br>“Wood mouse” BBCH $\geq$ 40 |      |      |      | 2.3  | 1.27  | ■ |
| <b>Pome fruit SEZ (BBCH 67 - 85)</b>                    |      |      |      |      |       |   |
| Small herbivorous mammal,<br>“Vole” BBCH $\geq$ 40      | 0.75 | 1.25 | 0.53 | 21.7 | 10.72 | ■ |
| Frugivorous mammal,<br>“Dormouse” BBCH 71-79            |      |      |      | 22.7 | 11.21 | ■ |
| Large herbivorous mammal,<br>“Rabbit”<br>BBCH $\geq$ 40 |      |      |      | 4.3  | 2.12  | ■ |
| Small omnivorous mammal,<br>“Wood mouse” BBCH $\geq$ 40 |      |      |      | 2.3  | 1.14  | ■ |
| <b>Pome fruit CEZ (BBCH 67 - 85)</b>                    |      |      |      |      |       |   |
| Small herbivorous mammal,<br>“Vole”<br>BBCH $\geq$ 40   | 0.5  | 1.25 | 0.53 | 21.7 | 7.14  | ■ |
| Frugivorous mammal,<br>“Dormouse”<br>BBCH 71-79         |      |      |      | 22.7 | 7.47  | ■ |
| Large herbivorous mammal,<br>“Rabbit”<br>BBCH $\geq$ 40 |      |      |      | 4.7  | 1.42  | ■ |
| Small omnivorous mammal,<br>“Wood mouse” BBCH $\geq$ 40 |      |      |      | 2.3  | 0.76  | ■ |
| <b>Potatoes (BBCH 40 - 49)</b>                          |      |      |      |      |       |   |
| Small herbivorous mammal<br>“Vole” BBCH $\geq$ 40       | 0.5  | 1.0  | 0.53 | 21.7 | 5.72  | ■ |
| Large herbivorous mammal<br>“Rabbit”<br>BBCH 10-40      |      |      |      | 4.9  | 1.29  | ■ |
| Small omnivorous mammal<br>“Wood mouse” BBCH $\geq$ 40  |      |      |      | 1.9  | 0.50  | ■ |
| Small insectivorous mammal<br>“Shrew”<br>BBCH $\geq$ 20 |      |      |      | 2.3  | 0.61  | ■ |

NOAEL = ■ mg a.s./kg bw/day

Values in **bold** are below the relevant trigger of 5, indicating high riskRefined risk assessment

No suitable ■ was considered acceptable for either ■ or ■.

Crop-specific refinement of the RUD for fruits.

Refinement of the PD values for the common vole

Risk assessment based on brown hare with the refinement of PT is not accepted for the risk assessment

The small herbivorous guild must not be disregarded and the refinement using wood mouse as a focal species is not accepted.

Refinement of the PD values for the wood mouse

| Appl. Rate [kg a.s./ha]                                          | Food Type      | MAF* (mean) | ftwa | Mean RUD** | FIR/bw | PD   | Deposition Factor*** | Daily Dietary Dose [mg a.s./kg bw] | TER <sub>LT</sub> |
|------------------------------------------------------------------|----------------|-------------|------|------------|--------|------|----------------------|------------------------------------|-------------------|
| <b>Generic focal species common vole - Citrus (BBCH 79 - 89)</b> |                |             |      |            |        |      |                      |                                    |                   |
| 0.5                                                              | Monocotyledons | 1.0         | ■    | 54.2       | 1.33   | 0.48 | 0.2                  | ■                                  | ■                 |
|                                                                  | Dicotyledons   |             |      | 28.7       |        |      |                      | 0.52                               |                   |
| <b>Sum Daily Dietary Dose</b>                                    |                |             |      |            |        |      |                      | ■                                  |                   |

NOAEL for the reproductive risk assessment = ■ mg a.s./kg bw/day

\* The MAF<sub>mean</sub> is 1.0 due to the single application rate

\*\* The default RUD values of 54.2 for grasses and cereals and of 28.7 for non-grass weeds as given in Appendix F of the GD (EFSA, 2009) are used. As the application is in autumn/winter, the PD of 0.48 for monocotyledons and 0.52 for dicotyledons is used in the risk assessment.

\*\*\* Deposition factors chosen according to the new "EFSA Guidance Document for evaluating laboratory and field dissipation studies to obtain DegT<sub>50</sub> values of active substances of plant protection products and transformation products of these active substances in soil" (EFSA Journal 2014;12(5):3662)

| Generic focal Species                           | Application Rate [kg a.s./ha] | MAF* (mean) | ftwa | Deposition factor** | FIR/bw | Mean RUD | PT (mean) | Daily Dietary Dose [mg a.s./kg bw] | TER <sub>LT</sub> |
|-------------------------------------------------|-------------------------------|-------------|------|---------------------|--------|----------|-----------|------------------------------------|-------------------|
| <b>Citrus (BBCH 79 - 89)</b>                    |                               |             |      |                     |        |          |           |                                    |                   |
| Frugivorous mammal, "Dormouse" BBCH 71-79       | 0.5                           | 1.0*        | 0.53 | 1                   | 1.16   | 0.764*** | 1.0       | 0.24                               | ■                 |
| Large herbivorous mammal, "lagomorph" BBCH ≥ 40 |                               |             | ■    | 0.2                 | 0.50   | 28.7     | 1.0       | ■                                  | ■                 |

NOAEL for the reproductive risk assessment = ■ mg a.s./kg bw/day

\* The MAF<sub>mean</sub> is 1.0 due to the single application rate

\*\* Deposition factors chosen according to the new "EFSA Guidance Document for evaluating laboratory and field dissipation studies to obtain DegT<sub>50</sub> values of active substances of plant protection products and transformation products of these active substances in soil" (EFSA Journal 2014;12(5):3662)

\*\*\* Refined mean RUD in fruits.

Values in **bold** are below the trigger value of 5, indicating high risk

| Appl. Rate [kg a.s./ha]                  | Food Type         | ftwa | Mean RUD | FIR/bw | PD   | Deposition Factor | Daily Dietary Dose [mg a.s./kg bw] | TER <sub>LT</sub> |   |
|------------------------------------------|-------------------|------|----------|--------|------|-------------------|------------------------------------|-------------------|---|
| <b>Focal species wood mouse - Citrus</b> |                   |      |          |        |      |                   |                                    |                   |   |
| 0.5                                      | weed seeds        | 0.53 | 40.2     | 0.28   | 0.50 | 0.35              | 0.52                               | ■                 |   |
|                                          | ground arthropods | ■    | 7.5      |        |      |                   | 0.25                               |                   | ■ |
|                                          | grasses           | ■    | 54.2     |        |      |                   | 0.25                               |                   | ■ |
| <b>Sum Daily Dietary Dose</b>            |                   |      |          |        |      |                   | ■                                  |                   |   |

NOAEL for the reproductive risk assessment = ■ mg a.s./kg bw/day

The MAF<sub>mean</sub> for the use in citrus is 1.0 due to the single application rate.

Values in **bold** are below the trigger value of 5, indicating unacceptable risk

| Appl. Rate<br>[kg<br>a.s./ha]                                                | Food Type      | MAF<br>(mean) | ftwa | Mean<br>RUD* | FIR/bw | PD   | Deposition<br>Factor** | Daily Dietary<br>Dose<br>[mg a.s./kg<br>bw] | TER <sub>LT</sub> |
|------------------------------------------------------------------------------|----------------|---------------|------|--------------|--------|------|------------------------|---------------------------------------------|-------------------|
| <b>Generic focal species common vole - Peaches/Nectarines (BBCH 71 - 85)</b> |                |               |      |              |        |      |                        |                                             |                   |
| 0.7                                                                          | Monocotyledons | 1.5           | ■    | 54.2         | 1.33   | 0.48 | 0.35                   | ■                                           | ■                 |
|                                                                              | Dicotyledons   |               |      | 28.7         |        |      |                        | 0.52                                        |                   |
| <b>Sum Daily Dietary Dose</b>                                                |                |               |      |              |        |      |                        | ■                                           |                   |

NOAEL for the reproductive risk assessment = ■ mg a.s./kg bw/day

\* The default RUD values of 54.2 for grasses and cereals and of 28.7 for non-grass weeds as given in Appendix F of the GD (EFSA, 2009) are used. As the application could be in autumn (late applications), the PD of 0.48 for monocotyledons and 0.52 for dicotyledons is used in the risk assessment.

\*\* Deposition factors chosen according to the new “EFSA Guidance Document for evaluating laboratory and field dissipation studies to obtain DegT<sub>50</sub> values of active substances of plant protection products and transformation products of these active substances in soil” (EFSA Journal 2014;12(5):3662)

| Generic focal Species                      | Mean RUD | MAF x TWA | Deposition factor** | FIR/bw | PT (mean) | PD | Daily Dietary Dose [mg a.s./kg bw] | TER <sub>LT</sub> |
|--------------------------------------------|----------|-----------|---------------------|--------|-----------|----|------------------------------------|-------------------|
| <b>Peaches/Nectarines (BBCH 71 - 85)</b>   |          |           |                     |        |           |    |                                    |                   |
| Frugivorous mammal, “Dormouse” BBCH 71-79  | 1.785*   | 0.795     | 1                   | 1.16   | 1.0       | 1  | 1.15                               | ■                 |
| Large herbivorous mammal, “Hare” BBCH ≥ 40 | 28.7     | ■         | 0.35                | 0.50   | 1.0       | 1  | ■                                  | ■                 |

NOAEL for the reproductive risk assessment = ■ mg a.s./kg bw/day

Phosmet is applied 2 times each with 0.7 kg a.s./ha and an interval of 10 days.

\* Refined mean RUD in fruits.

\*\* Deposition factors chosen according to the new “EFSA Guidance Document for evaluating laboratory and field dissipation studies to obtain DegT<sub>50</sub> values of active substances of plant protection products and transformation products of these active substances in soil” (EFSA Journal 2014;12(5):3662).

Values in **bold** are below the trigger value of 5, indicating high risk

| Appl. Rate<br>[kg a.s./ha]                           | Food Type         | Mean RUD | MAF x TWA | FIR/bw | PD   | Deposition Factor | Daily Dietary Dose [mg a.s./kg bw] | TER <sub>LT</sub> |   |
|------------------------------------------------------|-------------------|----------|-----------|--------|------|-------------------|------------------------------------|-------------------|---|
| <b>Focal species wood mouse - Peaches/Nectarines</b> |                   |          |           |        |      |                   |                                    |                   |   |
| 0.7<br>(10 days interval)                            | weed seeds        | 40.2     | 0.795     | 0.28   | 0.50 | 0.35              | 0.74                               | ■                 |   |
|                                                      | ground arthropods | 7.5      | ■         |        |      |                   | 0.25                               |                   | ■ |
|                                                      | grasses           | 54.2     | ■         |        |      |                   | 0.25                               |                   | ■ |
| <b>Sum Daily Dietary Dose</b>                        |                   |          |           |        |      |                   | ■                                  |                   |   |

NOAEL for the reproductive risk assessment = ■ mg a.s./kg bw/day

Values in **bold** are below the trigger value of 5, indicating unacceptable risk

| Appl. Rate<br>[kg<br>a.s./ha]                                            | Food Type      | MAF<br>(mean) | ftwa | Mean<br>RUD* | FIR/bw | PD   | Deposition<br>Factor** | Daily Dietary<br>Dose<br>[mg a.s./kg<br>bw] | TER <sub>LT</sub> |
|--------------------------------------------------------------------------|----------------|---------------|------|--------------|--------|------|------------------------|---------------------------------------------|-------------------|
| <b>Generic focal species common vole - Pome fruit SEZ (BBCH 67 - 85)</b> |                |               |      |              |        |      |                        |                                             |                   |
| 0.75                                                                     | Monocotyledons | 1.25          | ■    | 54.2         | 1.33   | 0.48 | 0.35                   | ■                                           | ■                 |
|                                                                          | Dicotyledons   |               |      | 28.7         |        |      |                        | 0.52                                        |                   |
| <b>Sum Daily Dietary Dose</b>                                            |                |               |      |              |        |      |                        | ■                                           |                   |

NOAEL for the reproductive risk assessment = ■ mg a.s./kg bw/day

\* The default RUD values of 54.2 for grasses and cereals and of 28.7 for non-grass weeds as given in Appendix F of the GD (EFSA, 2009) are used. As the application could be in autumn (late applications), the PD of 0.48 for monocotyledons and 0.52 for dicotyledons is used in the risk assessment.

\*\* Deposition factors chosen according to the new “EFSA Guidance Document for evaluating laboratory and field dissipation studies to obtain DegT<sub>50</sub> values of active substances of plant protection products and transformation products of these active substances in soil” (EFSA Journal 2014;12(5):3662).

| Generic focal Species                      | Mean RUD | MAF x TWA | Deposition factor** | FIR/bw | PT (mean) | PD | Daily Dietary Dose [mg a.s./kg bw] | TER <sub>LT</sub> |
|--------------------------------------------|----------|-----------|---------------------|--------|-----------|----|------------------------------------|-------------------|
| <b>Pome fruit SEZ (BBCH 67 - 85)</b>       |          |           |                     |        |           |    |                                    |                   |
| Frugivorous mammal, “Dormouse” BBCH 71-79  | 1.151*   | 0.66      | 1                   | 1.16   | 1.0       | 1  | 0.66                               | ■                 |
| Large herbivorous mammal, “hare” BBCH ≥ 40 | 28.7     | ■         | 0.35                | 0.50   | 1.0       | 1  | ■                                  | ■                 |

NOAEL for the reproductive risk assessment = ■ mg a.s./kg bw/day

Phosmet is applied 2 times each with 0.75 kg a.s./ha and an interval of 20 days

\* Refined mean RUD in fruits.

\*\* Deposition factors chosen according to the new “EFSA Guidance Document for evaluating laboratory and field dissipation studies to obtain DegT<sub>50</sub> values of active substances of plant protection products and transformation products of these active substances in soil” (EFSA Journal 2014;12(5):3662)

Values in **bold** are below the trigger value of 5, indicating high risk

| Appl. Rate<br>[kg a.s./ha]                         | Food Type         | Mean RUD | MAF x TWA | FIR/bw | PD   | Deposition Factor | Daily Dietary Dose [mg a.s./kg bw] | TER <sub>LT</sub> |
|----------------------------------------------------|-------------------|----------|-----------|--------|------|-------------------|------------------------------------|-------------------|
| <b>Focal species wood mouse - Pome fruit (SEZ)</b> |                   |          |           |        |      |                   |                                    |                   |
| 0.75<br>(20 days interval)                         | weed seeds        | 40.2     | 0.66      | 0.28   | 0.5  | 0.35              | 0.66                               | ■                 |
|                                                    | ground arthropods | 7.5      | ■         |        | 0.25 |                   | ■                                  |                   |
|                                                    | grasses           | 54.2     | ■         |        | 0.25 |                   | ■                                  |                   |
| <b>Sum Daily Dietary Dose</b>                      |                   |          |           |        |      |                   | ■                                  |                   |

NOAEL for the reproductive risk assessment = ■ mg a.s./kg bw/day

Values in **bold** are below the trigger value of 5, indicating high risk

| Appl. Rate [kg a.s./ha]                                                  | Food Type      | MAF (mean) | ftwa | Mean RUD* | FIR/bw | PD   | Deposition Factor** | Daily Dietary Dose [mg a.s./kg bw] | TER <sub>LT</sub> |
|--------------------------------------------------------------------------|----------------|------------|------|-----------|--------|------|---------------------|------------------------------------|-------------------|
| <b>Generic focal species common vole - Pome fruit CEZ (BBCH 67 - 85)</b> |                |            |      |           |        |      |                     |                                    |                   |
| 0.5                                                                      | Monocotyledons | ■          | ■    | 54.2      | 1.33   | 0.48 | 0.35                | ■                                  | ■                 |
|                                                                          | Dicotyledons   |            |      | 28.7      |        | 0.52 |                     | ■                                  |                   |
| <b>Sum Daily Dietary Dose</b>                                            |                |            |      |           |        |      |                     | ■                                  |                   |

NOAEL for the reproductive risk assessment = ■ mg a.s./kg bw/day

\* The default RUD values of 54.2 for grasses and cereals and of 28.7 for non-grass weeds as given in Appendix F of the GD (EFSA, 2009) are used. As the application could be in autumn (late applications), the PD of 0.48 for monocotyledons and 0.52 for dicotyledons is used in the risk assessment.

\*\* Deposition factors chosen according to the new “EFSA Guidance Document for evaluating laboratory and field dissipation studies to obtain DegT<sub>50</sub> values of active substances of plant protection products and transformation products of these active substances in soil” (EFSA Journal 2014;12(5):3662)

| Generic focal Species                      | Mean RUD | MAF x TWA | Deposition factor** | FIR/bw | PT (mean) | PD | Daily Dietary Dose [mg a.s./kg bw] | TER <sub>LT</sub> |
|--------------------------------------------|----------|-----------|---------------------|--------|-----------|----|------------------------------------|-------------------|
| <b>Pome fruit CEZ (BBCH 67 - 85)</b>       |          |           |                     |        |           |    |                                    |                   |
| Frugivorous mammal, “Dormouse” BBCH 71-79  | 1.364*   | ■         | 1                   | 1.16   | 1.0       | 1  | ■                                  | ■                 |
| Large herbivorous mammal, “hare” BBCH ≥ 40 | 28.7     | ■         | 0.35                | 0.50   | 1.0       | 1  | ■                                  | ■                 |

NOAEL for the reproductive risk assessment = ■ mg a.s./kg bw/day

Phosmet is applied 2 times each with 0.5 kg a.s./ha and an interval of 20 days

\*Refined mean RUD in fruits.

\*\* Deposition factors chosen according to the new “EFSA Guidance Document for evaluating laboratory and field dissipation studies to obtain DegT<sub>50</sub> values of active substances of plant protection products and transformation products of these active substances in soil” (EFSA Journal 2014;12(5):3662)

Values in **bold** are below the trigger value of 5, indicating high risk

| Appl. Rate [kg a.s./ha]                            | Food Type         | Mean RUD | MAF x TWA | FIR/bw | PD  | Deposition Factor | Daily Dietary Dose [mg a.s./kg bw] | TER <sub>LT</sub> |   |
|----------------------------------------------------|-------------------|----------|-----------|--------|-----|-------------------|------------------------------------|-------------------|---|
| <b>Focal species wood mouse - Pome fruit (CEZ)</b> |                   |          |           |        |     |                   |                                    |                   |   |
| 0.5 (20 days interval)                             | weed seeds        | 40.2     | 0.66      | 0.28   | 0.5 | 0.35              | ■                                  | ■                 |   |
|                                                    | ground arthropods | 7.5      | ■         |        |     |                   | 0.25                               |                   | ■ |
|                                                    | grasses           | 54.2     | ■         |        |     |                   | 0.25                               |                   | ■ |
| <b>Sum Daily Dietary Dose</b>                      |                   |          |           |        |     |                   | ■                                  |                   |   |

NOAEL for the reproductive risk assessment = ■ mg a.s./kg bw/day

Values in **bold** are below the trigger value of 5, indicating high risk

| Generic focal Species                      | Application Rate [kg a.s./ha] | MAF* (mean) | ftwa | Deposition factor** | FIR/bw | Mean RUD | PT (mean) | PD   | Daily Dietary Dose [mg a.s./kg bw] | TER <sub>L</sub> <sub>T</sub> |
|--------------------------------------------|-------------------------------|-------------|------|---------------------|--------|----------|-----------|------|------------------------------------|-------------------------------|
| <b>Potatoes (BBCH 40 - 49)</b>             |                               |             |      |                     |        |          |           |      |                                    |                               |
| Small herbivorous mammal "Vole" BBCH ≥ 40  | 0.5                           | 1.0         | ■    | 0.15                | 1.33   | 28.7     | 1.0       | 0.48 | ■                                  | ■                             |
|                                            |                               |             |      |                     |        | 54.2     |           | 0.52 |                                    |                               |
| <b>Sum Daily Dietary Dose</b>              |                               |             |      |                     |        |          |           |      | ■                                  |                               |
| Large herbivorous mammal "Hare" BBCH 10-40 |                               | 1.0         | ■    | 0.15                | 0.50   | 28.7     | 0.77      | 1    | ■                                  | ■                             |

NOAEL for the reproductive risk assessment = ■ mg a.s./kg bw/day

\* The MAF<sub>mean</sub> is 1.0 due to the single application rate

\*\* Deposition factors chosen according to the new "EFSA Guidance Document for evaluating laboratory and field dissipation studies to obtain DegT<sub>50</sub> values of active substances of plant protection products and transformation products of these active substances in soil" (EFSA Journal 2014;12(5):3662)

Values in **bold** are below the trigger value of 5, indicating high risk

| Appl. Rate [kg a.s./ha]                    | Food Type         | ftwa | Mean RUD | FIR/bw | PD  | Deposition Factor | Daily Dietary Dose [mg a.s./kg bw] | TER <sub>L</sub> <sub>T</sub> |   |
|--------------------------------------------|-------------------|------|----------|--------|-----|-------------------|------------------------------------|-------------------------------|---|
| <b>Focal species wood mouse - Potatoes</b> |                   |      |          |        |     |                   |                                    |                               |   |
| 0.5                                        | weed seeds        | ■    | 40.2     | 0.28   | 0.5 | 0.15              | ■                                  | ■                             |   |
|                                            | ground arthropods | ■    | 7.5      |        |     |                   | 0.25                               |                               | ■ |
|                                            | grasses           | ■    | 54.2     |        |     |                   | 0.25                               |                               | ■ |
| <b>Sum Daily Dietary Dose</b>              |                   |      |          |        |     |                   | ■                                  |                               |   |

NOAEL for the reproductive risk assessment = ■ mg a.s./kg bw/day

The MAF<sub>mean</sub> for the use in citrus is 1.0 due to the single application rate.

Values in **bold** are below the trigger value of 5, indicating high risk

#### **Risk from bioaccumulation and food chain behaviour** [indicate when not relevant i.e if Log K<sub>ow</sub> ≤ 3]

Log Pow of Phosmet and its metabolites is below 3

#### **Risk from consumption of contaminated water**

Puddle scenario, Screening step

As the ratios of effective application rate (in g/ha) to the relevant endpoint (in mg/kg bw/d) does not exceed the value of 3000 (K<sub>oc</sub> ≥ 500 L/kg) for Phosmet, it is not necessary to conduct a drinking water risk assessment for birds and mammals.

**Toxicity data for all aquatic tested species (Regulation (EU) N° 283/2013, Annex Part A, points 8.2 and Regulation (EU) N° 284/2013 Annex Part A, point 10.2)**

| Group                        | Test substance                     | Time-scale<br>(Test type)               | End point                   | Toxicity <sup>1</sup>                         |
|------------------------------|------------------------------------|-----------------------------------------|-----------------------------|-----------------------------------------------|
| <b>Laboratory tests</b>      |                                    |                                         |                             |                                               |
| <b>Fish</b>                  |                                    |                                         |                             |                                               |
| <i>Oncorhynchus mykiss</i>   | Phosmet tech.                      | Acute 96 hr<br>(flow-through)           | Mortality, LC <sub>50</sub> | 241 µg<br>a.s./L <sub>(mm)</sub>              |
| <i>Lepomis macrochirus</i>   | Phosmet tech.                      | Acute 96 hr<br>(flow-through)           | Mortality, LC <sub>50</sub> | 19.7 µg<br>a.s./L <sub>(mm)</sub>             |
| <i>Oncorhynchus mykiss</i>   | Imidan 50WP                        | Acute 96 hr<br>(flow-through)           | Mortality, LC <sub>50</sub> | 313 µg<br>prep./L<br>(152 µg a.s./L<br>(mm))  |
| <i>Danio rerio</i>           | Phosmet tech.                      | Acute 96 hr<br>(flow-through)           | Mortality, LC <sub>50</sub> | 1011.6 µg<br>a.s./L <sub>(mm)</sub>           |
| <i>Cyprinus carpio</i>       | Phosmet tech.                      | Acute 96 hr<br>(flow-through)           | Mortality, LC <sub>50</sub> | >1351 µg<br>a.s./L <sub>(mm)</sub>            |
| <i>Oncorhynchus mykiss</i>   | Phosmet tech.                      | Chronic 60<br>day ELS<br>(flow-through) | Length, NOEC                | 3.2 µg<br>a.s./L <sub>(mm)</sub>              |
| <i>Oncorhynchus mykiss</i>   | Phthalamic acid                    | 96 hr (static)                          | Mortality, LC <sub>50</sub> | > 100 mg<br>a.s./L <sub>(nom)</sub>           |
| <i>Cyprinodon Variegatus</i> | Phthalamic acid                    | 96 hr (static)                          | Mortality, LC <sub>50</sub> | > 100 mg/L<br>(nom)                           |
| <i>Oncorhynchus mykiss</i>   | Phthalic acid                      | 96 hr (static)                          | Mortality, LC <sub>50</sub> | > 100 mg/L<br>(nom)                           |
| <i>Oncorhynchus mykiss</i>   | O,O-dimethylphosphoric acid        | 96 hr (static)                          | Mortality, LC <sub>50</sub> | > 100 mg<br>a.s./L <sub>(nom)</sub>           |
| <i>Oncorhynchus mykiss</i>   | O,O-dimethylphosphorodithioic acid | 96 hr (static)                          | Mortality, LC <sub>50</sub> | > 100 mg<br>a.s./L <sub>(nom)</sub>           |
| <i>Oncorhynchus mykiss</i>   | Phthalimide                        | 96 hr (static)                          | Mortality, LC <sub>50</sub> | 49 mg/L<br>(mm)                               |
| <i>Lepomis Macrochirus</i>   | Phthalimide                        | 96 hr (static)                          | Mortality, LC <sub>50</sub> | 38 mg/L<br>(mm)                               |
| <i>Cyprinodon Variegatus</i> | Phthalimide                        | 96 hr (static)                          | Mortality, LC <sub>50</sub> | 47.7 mg/L<br>(mm)                             |
| <b>Aquatic invertebrates</b> |                                    |                                         |                             |                                               |
| <i>Daphnia magna</i>         | Phosmet                            | 48 h (flow-through)                     | Mortality, EC <sub>50</sub> | 2.77 µg<br>a.s./L <sub>(mm)</sub>             |
| <i>Daphnia magna</i>         | Imidan 50WP                        | 48 h (flow-through)                     | Mortality, EC <sub>50</sub> | 8.64 µg<br>prep./L<br>(4.4 µg a.s./L<br>(mm)) |
| <i>Daphnia magna</i>         | Phosmet                            | 21 d (flow-through)                     | Reproduction, NOEC          | 0.78 µg<br>a.s./L <sub>(mm)</sub>             |
| <i>Daphnia magna</i>         | Phthalamic acid                    | 48 h (static)                           | Mortality, EC <sub>50</sub> | > 100 mg<br>a.s./L <sub>(nom)</sub>           |
| <i>Daphnia magna</i>         | N-methoxymethyl phthalimide        | 48 h (semi-static)                      | Mortality, EC <sub>50</sub> | > 87.3 mg<br>a.s./L <sub>(mm)</sub>           |
| <i>Daphnia magna</i>         | O,O-dimethylphosphoric acid        | 48 h (static)                           | Mortality, EC <sub>50</sub> | > 100 mg<br>a.s./L <sub>(nom)</sub>           |
| <i>Daphnia magna</i>         | O,O-dimethylphosphorodithioic acid | 48 h (static)                           | Mortality, EC <sub>50</sub> | > 100 mg<br>a.s./L <sub>(nom)</sub>           |

|                                                                                                                                                                                                                                                                                                                                                                                                                                                                                                                                                                                                                                                                                                                                                                                                                                                                                                                                                                                                                                                                                                                                                                                                                                                                                                                                                                                                                                                                                                                                                                                                                                                                                                                                                                                                                                                              |                                 |                        |                             |                                 |
|--------------------------------------------------------------------------------------------------------------------------------------------------------------------------------------------------------------------------------------------------------------------------------------------------------------------------------------------------------------------------------------------------------------------------------------------------------------------------------------------------------------------------------------------------------------------------------------------------------------------------------------------------------------------------------------------------------------------------------------------------------------------------------------------------------------------------------------------------------------------------------------------------------------------------------------------------------------------------------------------------------------------------------------------------------------------------------------------------------------------------------------------------------------------------------------------------------------------------------------------------------------------------------------------------------------------------------------------------------------------------------------------------------------------------------------------------------------------------------------------------------------------------------------------------------------------------------------------------------------------------------------------------------------------------------------------------------------------------------------------------------------------------------------------------------------------------------------------------------------|---------------------------------|------------------------|-----------------------------|---------------------------------|
| <i>Daphnia magna</i>                                                                                                                                                                                                                                                                                                                                                                                                                                                                                                                                                                                                                                                                                                                                                                                                                                                                                                                                                                                                                                                                                                                                                                                                                                                                                                                                                                                                                                                                                                                                                                                                                                                                                                                                                                                                                                         | Phthalimide                     | 48 h (static)          | Mortality, EC <sub>50</sub> | 39 mg/L (mm)                    |
| <i>Daphnia magna</i>                                                                                                                                                                                                                                                                                                                                                                                                                                                                                                                                                                                                                                                                                                                                                                                                                                                                                                                                                                                                                                                                                                                                                                                                                                                                                                                                                                                                                                                                                                                                                                                                                                                                                                                                                                                                                                         | Phthalamic acid                 | 48 h (static)          | Mortality, EC <sub>50</sub> | >100 mg/L (nom)                 |
| <i>Daphnia magna</i>                                                                                                                                                                                                                                                                                                                                                                                                                                                                                                                                                                                                                                                                                                                                                                                                                                                                                                                                                                                                                                                                                                                                                                                                                                                                                                                                                                                                                                                                                                                                                                                                                                                                                                                                                                                                                                         | Phthalic acid                   | 48 h (static)          | Mortality, EC <sub>50</sub> | >100 mg/L (nom)                 |
| <i>Daphnia magna</i>                                                                                                                                                                                                                                                                                                                                                                                                                                                                                                                                                                                                                                                                                                                                                                                                                                                                                                                                                                                                                                                                                                                                                                                                                                                                                                                                                                                                                                                                                                                                                                                                                                                                                                                                                                                                                                         | N-hydroxymethyl phthalamic acid |                        |                             | N/A <sup>2</sup>                |
| <b>Sediment-dwelling organisms</b>                                                                                                                                                                                                                                                                                                                                                                                                                                                                                                                                                                                                                                                                                                                                                                                                                                                                                                                                                                                                                                                                                                                                                                                                                                                                                                                                                                                                                                                                                                                                                                                                                                                                                                                                                                                                                           |                                 |                        |                             |                                 |
| No data                                                                                                                                                                                                                                                                                                                                                                                                                                                                                                                                                                                                                                                                                                                                                                                                                                                                                                                                                                                                                                                                                                                                                                                                                                                                                                                                                                                                                                                                                                                                                                                                                                                                                                                                                                                                                                                      |                                 |                        |                             |                                 |
| <b>Algae</b>                                                                                                                                                                                                                                                                                                                                                                                                                                                                                                                                                                                                                                                                                                                                                                                                                                                                                                                                                                                                                                                                                                                                                                                                                                                                                                                                                                                                                                                                                                                                                                                                                                                                                                                                                                                                                                                 |                                 |                        |                             |                                 |
| <i>Pseudokirchneriella subcapitata</i>                                                                                                                                                                                                                                                                                                                                                                                                                                                                                                                                                                                                                                                                                                                                                                                                                                                                                                                                                                                                                                                                                                                                                                                                                                                                                                                                                                                                                                                                                                                                                                                                                                                                                                                                                                                                                       | Imidan 50 WP                    | 72 h ErC <sub>50</sub> | ErC <sub>50</sub> (static)  | 73.90 µg a.s./L <sub>(mm)</sub> |
| <i>Pseudokirchneriella subcapitata</i>                                                                                                                                                                                                                                                                                                                                                                                                                                                                                                                                                                                                                                                                                                                                                                                                                                                                                                                                                                                                                                                                                                                                                                                                                                                                                                                                                                                                                                                                                                                                                                                                                                                                                                                                                                                                                       | Phthalamic acid                 | 72 h ErC <sub>50</sub> | ErC <sub>50</sub> (static)  | >100 mg/L (nom)                 |
| <i>Pseudokirchneriella subcapitata</i>                                                                                                                                                                                                                                                                                                                                                                                                                                                                                                                                                                                                                                                                                                                                                                                                                                                                                                                                                                                                                                                                                                                                                                                                                                                                                                                                                                                                                                                                                                                                                                                                                                                                                                                                                                                                                       | Phthalic acid                   | 72 h ErC <sub>50</sub> | ErC <sub>50</sub> (static)  | >100 mg/L (nom)                 |
| <b>Higher plant</b>                                                                                                                                                                                                                                                                                                                                                                                                                                                                                                                                                                                                                                                                                                                                                                                                                                                                                                                                                                                                                                                                                                                                                                                                                                                                                                                                                                                                                                                                                                                                                                                                                                                                                                                                                                                                                                          |                                 |                        |                             |                                 |
| No data                                                                                                                                                                                                                                                                                                                                                                                                                                                                                                                                                                                                                                                                                                                                                                                                                                                                                                                                                                                                                                                                                                                                                                                                                                                                                                                                                                                                                                                                                                                                                                                                                                                                                                                                                                                                                                                      |                                 |                        |                             |                                 |
| Further testing on aquatic organisms                                                                                                                                                                                                                                                                                                                                                                                                                                                                                                                                                                                                                                                                                                                                                                                                                                                                                                                                                                                                                                                                                                                                                                                                                                                                                                                                                                                                                                                                                                                                                                                                                                                                                                                                                                                                                         |                                 |                        |                             |                                 |
| Three mesocosms were submitted by applicant:                                                                                                                                                                                                                                                                                                                                                                                                                                                                                                                                                                                                                                                                                                                                                                                                                                                                                                                                                                                                                                                                                                                                                                                                                                                                                                                                                                                                                                                                                                                                                                                                                                                                                                                                                                                                                 |                                 |                        |                             |                                 |
| <ol style="list-style-type: none"> <li>1. The study of Rate and Memmert (2003 Doc N° 862-002) was re-evaluated statistically by the applicant, according to the EFSA Aquatic GD (PPR Panel, 2013) after the commenting period. During the Pesticide Peer Review Meeting 08 (17 – 21 June 2019), it was highlighted that for [REDACTED]. Thus, a NOEC for insect emergence could not be derived. The effects on <i>Helobdella stagnalis</i> and Tubificidae in the MASS data set at 0.5 µg/L could not be clearly related to the exposure due to the mode of action of the substance and the time course of the data. T [REDACTED]. Accordingly, during the Pesticide Peer Review Meeting 08 (17 – 21 June 2019), it was agreed that [REDACTED] can be derived from this study. Therefore, this study [REDACTED] to derive ETO and ERO-RAC.</li> <li>2. For the study of Hommen U (2009, Doc N° 862-003) there were concerns about the richness and abundance of key and sensitive species. In addition, there were serious exposure issues in enclosures with high pH. The applicant removed from the statistical analysis the enclosures with pH &gt; 8.5 resulting in only one replicate for treatment. Thus, a Regulatory Acceptable Concentration (RAC) to be used in a quantitative risk assessment should not be derived from this study.</li> <li>3. For the study of Hommen (2009b, Doc N° 861-00Sever1), a NOEC based on class 2 effects was identified at 2 µg/L (combination of class 2 effect up to 5 µg/L for <i>Brachionus</i> and class 1 effects up to 2 µg/L for other taxa) following the expert meeting. However, only zooplankton is considered in this study. In the Memmert &amp; Ratte study the most sensitive species [REDACTED] therefore this study [REDACTED]. Overall, the experts agreed that the study [REDACTED].</li> </ol> |                                 |                        |                             |                                 |
| Overall, [REDACTED]. However, the available information, mainly the Memmert and Ratte (2003) study, can be used for demonstrating that [REDACTED] when the invertebrate community is exposed to phosmet concentrations [REDACTED].                                                                                                                                                                                                                                                                                                                                                                                                                                                                                                                                                                                                                                                                                                                                                                                                                                                                                                                                                                                                                                                                                                                                                                                                                                                                                                                                                                                                                                                                                                                                                                                                                           |                                 |                        |                             |                                 |
| <b>Potential endocrine disrupting properties (Annex Part A, point 8.2.3)</b>                                                                                                                                                                                                                                                                                                                                                                                                                                                                                                                                                                                                                                                                                                                                                                                                                                                                                                                                                                                                                                                                                                                                                                                                                                                                                                                                                                                                                                                                                                                                                                                                                                                                                                                                                                                 |                                 |                        |                             |                                 |
| A FSTRA study was conducted. In males, a decrease of nuptial tubercle score and an increase of VTG in plasma and the proportion of spermatogonia was detected at 9.3 µg/L exposure level. In females, a decrease of Gonadal Somatic Index (GSI) and yolk synthesis in ovaries was observed as the tested concentration increases.                                                                                                                                                                                                                                                                                                                                                                                                                                                                                                                                                                                                                                                                                                                                                                                                                                                                                                                                                                                                                                                                                                                                                                                                                                                                                                                                                                                                                                                                                                                            |                                 |                        |                             |                                 |
| Regarding the T-modality, one AMA according to OECD TG 231 is available. It was noted that there is an effect on development but without effects on thyroid histopathology, therefore this is not considered ED                                                                                                                                                                                                                                                                                                                                                                                                                                                                                                                                                                                                                                                                                                                                                                                                                                                                                                                                                                                                                                                                                                                                                                                                                                                                                                                                                                                                                                                                                                                                                                                                                                              |                                 |                        |                             |                                 |



mediated effects. Overall, it can be concluded that the substance does not meet the criteria for the T modality for non-target organisms.

For the EAS modalities a FSTRA according to OECD TG 229 was available detecting the effects above mentioned (effects on VTG changes in males, SSC in male and effects on gonad histopathology at 9.3 µg/L; effects in females in gonad histopathology (GSI) but in absence of VTG changes in females). At the same dose where these effects were observed (9.3 µg/L), a 25% combined mortality is reported, therefore these effects are very likely to be the results of systemic toxicity. A 25% mortality in female is even reported at the lowest dose tested of 1 µg/L.

During the Pesticide Peer Review Meeting 06 (12 – 13 June 2019) it was agreed that, considering the information from the mam tox section that supports the presence of effects secondary to systemic toxicity, it is not possible to conclude that the endocrine mode of action is the primary mode of action, but that endocrine related effects can be secondary to systemic toxicity.

The majority of the experts agreed that the substance does not meet the criteria for EAS modalities.

Overall, the experts at the meeting agreed that phosmet does not meet the ED criteria for non-target organisms.

<sup>1</sup> (nom) nominal concentration; (mm) mean measured concentration; prep.: preparation; a.s.: active substance

<sup>2</sup> No toxicity data are available for the metabolite N-hydroxymethyl phthalamic acid. However, considering the low predicted concentrations in surface water, together with the data from the other metabolites (showing low toxicity) and the lack of stability of the metabolite, overall indicate a low risk from the exposure to this metabolite.

### Toxicity/exposure ratios for the most sensitive aquatic organisms (Regulation (EU) N° 284/2013, Annex Part A, point 10.2)

#### FOCUS<sub>sw</sub> step 3-4 - TERs for phosmet – Citrus at 500 g a.s./ha [1 application]

| Scenario | PEC global max (µg L) | fish acute                 | fish chronic         | Aquatic invertebrates | Aquatic invertebrates prolonged | Algae |
|----------|-----------------------|----------------------------|----------------------|-----------------------|---------------------------------|-------|
| Citrus   | Geomean               | <i>Oncorhynchus mykiss</i> | <i>Daphnia magna</i> | <i>Daphnia magna</i>  | <i>P. subcapitata</i>           |       |
|          | 96h-LC <sub>50</sub>  | ELS-NOEC                   | 48h-EC <sub>50</sub> | 21d-NOEC              | 72h-ErC <sub>50</sub>           |       |
|          | 267.8 µg/L            | 3.2 µg/L                   | 2.77 µg/L            | 0.78 µg/L             | 73.9 µg/L                       |       |

#### FOCUS Step 3

|            |           |            |           |            |           |           |
|------------|-----------|------------|-----------|------------|-----------|-----------|
| <b>100</b> | <b>10</b> | <b>100</b> | <b>10</b> | <b>100</b> | <b>10</b> | <b>10</b> |
| <b>100</b> | <b>10</b> | <b>100</b> | <b>10</b> | <b>100</b> | <b>10</b> | <b>10</b> |
| Trigger    |           | 100        | 10        | 100        | 10        | 10        |

#### FOCUS Step

4

(20 meters non-spray buffer +20 m vegetated field strips)

|            |           |            |           |            |           |           |
|------------|-----------|------------|-----------|------------|-----------|-----------|
| <b>100</b> | <b>10</b> | <b>100</b> | <b>10</b> | <b>100</b> | <b>10</b> | <b>10</b> |
| <b>100</b> | <b>10</b> | <b>100</b> | <b>10</b> | <b>100</b> | <b>10</b> | <b>10</b> |
| Trigger    |           | 100        | 10        | 100        | 10        | 10        |

**Bold** values indicate high risk





**FOCUS<sub>sw</sub> step 3-4 - TERs for phosmet – Pome fruit at 750 g a.s./ha [2 application-late]**

| Scenario                              | PEC global max (µg L) | fish acute           | fish chronic               | Aquatic invertebrates | Aquatic invertebrates prolonged | Algae                 |
|---------------------------------------|-----------------------|----------------------|----------------------------|-----------------------|---------------------------------|-----------------------|
| Pome fruit. Multiple late application |                       | Geomean              | <i>Oncorhynchus mykiss</i> | <i>Daphnia magna</i>  | <i>Daphnia magna</i>            | <i>P. subcapitata</i> |
|                                       |                       | 96h-LC <sub>50</sub> | ELS-NOEC                   | 48h-EC <sub>50</sub>  | 21d-NOEC                        | 72h-ErC <sub>50</sub> |
|                                       |                       | 267.8 µg/L           | 3.2 µg/L                   | 2.77 µg/L             | 0.78 µg/L                       | 73.9 µg/L             |

**FOCUS Step 3**

|            |      |      |      |      |      |      |
|------------|------|------|------|------|------|------|
| ██████████ | ████ | ████ | ████ | ████ | ████ | ████ |
| ██████████ | ██   | ██   | ████ | ████ | ████ | ████ |
| ██████████ | ████ | ████ | ████ | ████ | ████ | ████ |
| ██████████ | ██   | ██   | ████ | ████ | ████ | ████ |
| ██████████ | ████ | ████ | ████ | ████ | ████ | ████ |
| ██████████ | ██   | ██   | ████ | ████ | ████ | ████ |
| ██████████ | ████ | ████ | ████ | ████ | ████ | ████ |
| ██████████ | ██   | ██   | ████ | ████ | ████ | ████ |
| ██████████ | ████ | ████ | ████ | ████ | ████ | ████ |
| ██████████ | ██   | ██   | ████ | ████ | ████ | ████ |
| Trigger    |      | 100  | 10   | 100  | 10   | 10   |

**FOCUS Step 4**

(20 meters non-spray buffer +20 m vegetated field strips)

|            |      |      |      |      |      |      |
|------------|------|------|------|------|------|------|
| ██████████ | ████ | ████ | ████ | ████ | ████ | ████ |
| ██████████ | ██   | ██   | ████ | ████ | ████ | ████ |
| ██████████ | ████ | ████ | ████ | ████ | ████ | ████ |
| ██████████ | ██   | ██   | ████ | ████ | ████ | ████ |
| ██████████ | ████ | ████ | ████ | ████ | ████ | ████ |
| ██████████ | ██   | ██   | ████ | ████ | ████ | ████ |
| ██████████ | ████ | ████ | ████ | ████ | ████ | ████ |
| ██████████ | ██   | ██   | ████ | ████ | ████ | ████ |
| ██████████ | ████ | ████ | ████ | ████ | ████ | ████ |
| ██████████ | ██   | ██   | ████ | ████ | ████ | ████ |
| Trigger    |      | 100  | 10   | 100  | 10   | 10   |

**Bold** values indicate high risk















**FOCUS<sub>sw</sub> step 3-4 - TERs for phosmet – Peaches/Nectarines at 700 g a.s./ha [1 application-early]**

| Scenario                                           | PEC<br>global<br>max<br>(µg L) | fish acute           | fish chronic                   | Aquatic<br>invertebrates | Aquatic<br>invertebrates<br>prolonged | Algae                              |
|----------------------------------------------------|--------------------------------|----------------------|--------------------------------|--------------------------|---------------------------------------|------------------------------------|
| Peaches/Nectarines.<br>Single early<br>application |                                | Geomean              | <i>Oncorhynchus<br/>mykiss</i> | <i>Daphnia<br/>magna</i> | <i>Daphnia<br/>magna</i>              | <i>P.<br/>subcapitata</i>          |
|                                                    |                                | 96h-LC <sub>50</sub> | ELS-NOEC                       | 48h-EC <sub>50</sub>     | 21d-NOEC                              | 72h-E <sub>r</sub> C <sub>50</sub> |
|                                                    |                                | 267.8 µg/L           | 3.2 µg/L                       | 2.77 µg/L                | 0.78 µg/L                             | 73.9 µg/L                          |

**FOCUS Step 3**

|            |      |      |      |      |      |      |
|------------|------|------|------|------|------|------|
| ██████████ | ████ | ████ | ████ | ████ | ████ | ████ |
| ██████████ | ██   | ██   | ████ | ████ | ████ | ██   |
| ██████████ | ████ | ████ | ████ | ████ | ████ | ████ |
| ██████████ | ██   | ██   | ████ | ████ | ████ | ██   |
| ██████████ | ████ | ██   | ████ | ████ | ████ | ████ |
| ██████████ | ██   | ██   | ████ | ████ | ████ | ██   |
| ██████████ | ████ | ████ | ████ | ████ | ████ | ████ |
| ██████████ | ████ | ████ | ████ | ████ | ████ | ████ |
| ██████████ | ████ | ██   | ████ | ████ | ████ | ████ |
| ██████████ | ████ | ████ | ████ | ████ | ████ | ████ |
| Trigger    |      | 100  | 10   | 100  | 10   | 10   |

**FOCUS Step 4  
(20 meters non-  
spray buffer +20 m  
vegetated field  
strips)**

|            |    |     |      |      |      |      |
|------------|----|-----|------|------|------|------|
| ██████████ | ██ | ██  | ████ | ████ | ████ | ██   |
| ██████████ | ██ | ██  | ████ | ████ | ████ | ████ |
| ██████████ | ██ | ██  | ████ | ████ | ████ | ██   |
| ██████████ | ██ | ██  | ████ | ████ | ████ | ████ |
| ██████████ | ██ | ██  | ████ | ████ | ████ | ██   |
| ██████████ | ██ | ██  | ████ | ████ | ████ | ████ |
| ██████████ | ██ | ██  | ████ | ████ | ████ | ██   |
| ██████████ | ██ | ██  | ████ | ████ | ████ | ████ |
| ██████████ | ██ | ██  | ████ | ████ | ████ | ██   |
| ██████████ | ██ | ██  | ████ | ████ | ████ | ████ |
| Trigger    |    | 100 | 10   | 100  | 10   | 10   |

**Bold** values indicate high risk





**FOCUS<sub>sw</sub> step 3-4 - TERs for phosmet – Potatoes at 500 g a.s./ha [1 application-early]**

| Scenario                    | PEC global max (µg L) | fish acute           | fish chronic               | Aquatic invertebrates | Aquatic invertebrates prolonged | Algae                              |
|-----------------------------|-----------------------|----------------------|----------------------------|-----------------------|---------------------------------|------------------------------------|
| Potatoes. early application |                       | Geomean              | <i>Oncorhynchus mykiss</i> | <i>Daphnia magna</i>  | <i>Daphnia magna</i>            | <i>P. subcapitata</i>              |
|                             |                       | 96h-LC <sub>50</sub> | ELS-NOEC                   | 48h-EC <sub>50</sub>  | 21d-NOEC                        | 72h-E <sub>r</sub> C <sub>50</sub> |
|                             |                       | 267.8 µg/L           | 3.2 µg/L                   | 2.77 µg/L             | 0.78 µg/L                       | 73.9 µg/L                          |

**FOCUS Step 3**

|          |    |     |    |     |    |    |
|----------|----|-----|----|-----|----|----|
| ████████ | ██ | ██  | ██ | ██  | ██ | ██ |
| ████████ | ██ | ██  | ██ | ██  | ██ | ██ |
| ████████ | ██ | ██  | ██ | ██  | ██ | ██ |
| ████████ | ██ | ██  | ██ | ██  | ██ | ██ |
| ████████ | ██ | ██  | ██ | ██  | ██ | ██ |
| ████████ | ██ | ██  | ██ | ██  | ██ | ██ |
| ████████ | ██ | ██  | ██ | ██  | ██ | ██ |
| ████████ | ██ | ██  | ██ | ██  | ██ | ██ |
| ████████ | ██ | ██  | ██ | ██  | ██ | ██ |
| ████████ | ██ | ██  | ██ | ██  | ██ | ██ |
| Trigger  |    | 100 | 10 | 100 | 10 | 10 |

**FOCUS Step 4  
(20 meters non-spray buffer +20 m vegetated field strips)**

|          |    |     |    |     |    |    |
|----------|----|-----|----|-----|----|----|
| ████████ | ██ | ██  | ██ | ██  | ██ | ██ |
| ████████ | ██ | ██  | ██ | ██  | ██ | ██ |
| ████████ | ██ | ██  | ██ | ██  | ██ | ██ |
| ████████ | ██ | ██  | ██ | ██  | ██ | ██ |
| ████████ | ██ | ██  | ██ | ██  | ██ | ██ |
| ████████ | ██ | ██  | ██ | ██  | ██ | ██ |
| ████████ | ██ | ██  | ██ | ██  | ██ | ██ |
| ████████ | ██ | ██  | ██ | ██  | ██ | ██ |
| ████████ | ██ | ██  | ██ | ██  | ██ | ██ |
| Trigger  |    | 100 | 10 | 100 | 10 | 10 |

**Bold** values indicate high risk



**Effects on bees (Regulation (EU) N° 283/2013, Annex Part A, point 8.3.1 and Regulation (EU) N° 284/2013 Annex Part A, point 10.3.1)**

| Species               | Test substance                    | Time scale/type of endpoint | End point                                  | toxicity                     |
|-----------------------|-----------------------------------|-----------------------------|--------------------------------------------|------------------------------|
| <i>Apis mellifera</i> | Phosmet technical (Purity: 97%)   | Acute                       | Oral toxicity (LD <sub>50</sub> )          | 0.37 µg a.s./bee             |
| <i>Apis mellifera</i> | Phosmet technical (Purity: 97%)   | Acute                       | Contact toxicity (LD <sub>50</sub> )       | <b>0.22 µg a.s./bee</b>      |
| <i>Apis mellifera</i> | Phosmet technical (Purity: 97%)   | Acute                       | Oral toxicity (LD <sub>50</sub> )          | <b>0.302 µg a.s./bee</b>     |
| <i>Apis mellifera</i> | Phosmet technical (Purity: 97%)   | Acute                       | Contact toxicity (LD <sub>50</sub> )       | 0.584 µg a.s./bee            |
| <i>Apis mellifera</i> | Phosmet technical (Purity: 96.5%) | Chronic                     | 10 d-LD <sub>50</sub> (LDD <sub>50</sub> ) | <b>0.092 µg a.s./bee/day</b> |
| <i>Apis mellifera</i> | Phosmet technical (Purity: 95.4%) | Bee brood development       | NOED larvae                                | <b>0.222 µg a.s./larva</b>   |

Potential for accumulative toxicity: No data

**Semi-field test (Cage and tunnel test)**

One semi-field study with a WP Formulation containing 500 g/kg phosmet (48.5 % w/w) in citrus in Spain and three more with Imidan 50 WP (50.15 % phosmet w/w) in flowering *Phacelia* in France were presented by the applicant but none of them has been accepted for the risk assessment due to several methodological uncertainties (Please refer to Vol. 3 CP B.9.5.1.5. for the evaluation of the studies).

A combined statistical analysis for the three honeybee tunnel studies conducted in flowering *Phacelia* in France 2008/2009 by Giffard (2009) has been conducted (for further details, please refer to the Study B.9.5.1.5/06). This combined statistical re-evaluation showed significant increases in mortality compared to control 2 days after application of phosmet after bee flight and still markedly greater 3 days after application at both 500 and 750 g a.s./ha. Significantly lower bee activity was observed until 2 after application of phosmet at 500 g a.s./ha and until the end of the combined assessment period of 4 days after application of phosmet at 750 g a.s./ha. For the 500 g a.s./ha 3DBF aged-residues treatment, which shows greater mortality than the control during the whole exposure period, at the end of this period 9 days after exposure, mortality is still ca. 60% greater than in the control.

**Overall, the experts agreed that these studies and their combination cannot be used to properly assess the risk, however they support the indication that exposure to phosmet increases the mortality of forager bees.**

**Field tests**

Two field studies in flowering *Phacelia* in Northern France and Italy, respectively, were performed to evaluate the effects on honey bees of two applications of Imidan 50 WP (50.15 % phosmet w/w) at 500 and 750 g a.s./ha during flowering but after bee flight. The field studies' methodology has been modified (from the OEPP/EPPO PP 1/170 (4) (2010)) to assess the mitigation measure: "Do not apply when bees are actively foraging". Both studies showed statistically significant mortalities 2 days after the first application and 2 days after the second (only for 750 g a.s./ha in the first study of Ythier, E., 2009 in France and for both 500 and 750 g a.s./ha in the second in Italy), but mortality values in both fields treated with phosmet at 2x 500 and 2x 750 g a.s./ha were still remarkably greater (though not statistically significant) to those of the control group 7 days after the first



application and 4 days after the second at both rates. (Please refer to Vol. 3 CP B.9.5.1.6. for the evaluation of the studies).

**Overall, the experts agreed that these studies cannot be used to properly assess risk, however they support the indication that exposure to phosmet increases the mortality of adult bees.**

#### Risk assessment according to SANCO (2002a)

##### Acute contact

| Crop                                  | Application Rate [g a.s./ha] | Acute contact LD <sub>50</sub> [µg a.s./bee] | HQ Value | Trigger |
|---------------------------------------|------------------------------|----------------------------------------------|----------|---------|
| <b>Representative uses in the SEZ</b> |                              |                                              |          |         |
| Citrus                                | 500                          | 0.22                                         | 2273     | 50      |
| Peaches/Nectarines                    | 700                          |                                              | 3182     |         |
| Pome fruit                            | 750                          |                                              | 3409     |         |
| <b>Representative uses in the CEZ</b> |                              |                                              |          |         |
| Pome fruit                            | 500                          | 0.22                                         | 2273     | 50      |
| Potatoes                              | 500                          |                                              | 2273     |         |

##### Acute oral

| Crop                                  | Application Rate [g a.s./ha] | Acute oral LD <sub>50</sub> [µg a.s./bee] | HQ Value | Trigger |
|---------------------------------------|------------------------------|-------------------------------------------|----------|---------|
| <b>Representative uses in the SEZ</b> |                              |                                           |          |         |
| Citrus                                | 500                          | 0.302                                     | 1655.6   | 50      |
| Peaches/Nectarines                    | 700                          |                                           | 2317.9   |         |
| Pome fruit                            | 750                          |                                           | 2483.4   |         |
| <b>Representative uses in the CEZ</b> |                              |                                           |          |         |
| Pome fruit                            | 500                          | 0.302                                     | 1655.6   | 50      |
| Potatoes                              | 500                          |                                           | 1655.6   |         |

#### Risk assessment according to EFSA (2013)

##### Citrus fruits (EU South –Field–) at 1 x 500 g a.s./ha (BBCH 79–89)

| Test substance         | Risk quotient | scenario   | BBCH       | Honeybee ( <i>Apis mellifera</i> ) |            |
|------------------------|---------------|------------|------------|------------------------------------|------------|
|                        |               |            |            | HQ / ETR                           | trigger    |
| Phosmet (Imidan 50 WP) | [REDACTED]    | [REDACTED] | [REDACTED] | [REDACTED]                         | [REDACTED] |
|                        |               | [REDACTED] | [REDACTED] | [REDACTED]                         | [REDACTED] |
|                        |               | [REDACTED] | [REDACTED] | [REDACTED]                         | [REDACTED] |
|                        | [REDACTED]    | [REDACTED] | [REDACTED] | [REDACTED]                         | [REDACTED] |
|                        |               | [REDACTED] | [REDACTED] | [REDACTED]                         | [REDACTED] |
|                        |               | [REDACTED] | [REDACTED] | [REDACTED]                         | [REDACTED] |
|                        |               | [REDACTED] | [REDACTED] | [REDACTED]                         | [REDACTED] |
|                        | [REDACTED]    | [REDACTED] | [REDACTED] | [REDACTED]                         | [REDACTED] |
|                        |               | [REDACTED] | [REDACTED] | [REDACTED]                         | [REDACTED] |
|                        |               | [REDACTED] | [REDACTED] | [REDACTED]                         | [REDACTED] |
|                        |               | [REDACTED] | [REDACTED] | [REDACTED]                         | [REDACTED] |
|                        | [REDACTED]    | [REDACTED] | [REDACTED] | [REDACTED]                         | [REDACTED] |
|                        |               | [REDACTED] | [REDACTED] | [REDACTED]                         | [REDACTED] |
|                        |               | [REDACTED] | [REDACTED] | [REDACTED]                         | [REDACTED] |
|                        |               | [REDACTED] | [REDACTED] | [REDACTED]                         | [REDACTED] |



Surface water

|         | water consumption ( $\mu\text{L}$ ) | ETR | Trigger |
|---------|-------------------------------------|-----|---------|
| acute   | 11.4                                | ■   | ■       |
| chronic | 11.4                                | ■   | ■       |
| larvae  | 111                                 | ■   | ■       |

Puddle water: ■

Pome fruits (EU Central –Field–) at 2 x 500 g a.s./ha (BBCH 67–85)

| Test substance            | Risk quotient | scenario | BBCH | Honeybee ( <i>Apis mellifera</i> ) |         |   |
|---------------------------|---------------|----------|------|------------------------------------|---------|---|
|                           |               |          |      | HQ / ETR                           | trigger |   |
| Phosmet<br>(Imidan 50 WP) | ■             | ■        | ■    | ■                                  | ■       |   |
|                           |               | ■        | ■    | ■                                  | ■       |   |
|                           |               | ■        | ■    | ■                                  | ■       |   |
|                           | ■             | ■        | ■    | ■                                  | ■       | ■ |
|                           |               |          | ■    | ■                                  | ■       | ■ |
|                           |               |          | ■    | ■                                  | ■       | ■ |
|                           |               |          | ■    | ■                                  | ■       | ■ |
|                           |               |          | ■    | ■                                  | ■       | ■ |
|                           |               |          | ■    | ■                                  | ■       | ■ |
|                           |               |          | ■    | ■                                  | ■       | ■ |
|                           |               |          | ■    | ■                                  | ■       | ■ |
|                           |               |          | ■    | ■                                  | ■       | ■ |
|                           |               |          | ■    | ■                                  | ■       | ■ |
|                           |               |          | ■    | ■                                  | ■       | ■ |
|                           |               |          | ■    | ■                                  | ■       | ■ |
|                           | ■             | ■        | ■    | ■                                  | ■       | ■ |
|                           |               |          | ■    | ■                                  | ■       | ■ |
|                           |               |          | ■    | ■                                  | ■       | ■ |
|                           |               |          | ■    | ■                                  | ■       | ■ |
|                           |               |          | ■    | ■                                  | ■       | ■ |
|                           |               |          | ■    | ■                                  | ■       | ■ |
|                           |               |          | ■    | ■                                  | ■       | ■ |
|                           |               |          | ■    | ■                                  | ■       | ■ |
|                           |               |          | ■    | ■                                  | ■       | ■ |
|                           |               |          | ■    | ■                                  | ■       | ■ |
|                           |               |          | ■    | ■                                  | ■       | ■ |
|                           |               |          | ■    | ■                                  | ■       | ■ |

Surface water

|         | water consumption ( $\mu\text{L}$ ) | ETR | Trigger |
|---------|-------------------------------------|-----|---------|
| acute   | 11.4                                | ■   | ■       |
| chronic | 11.4                                | ■   | ■       |
| larvae  | 111                                 | ■   | ■       |

Puddle water: No suitable exposure estimation

## Peaches/Nectarines (EU South –Field–) at 2x 700 g a.s./ha (BBCH 71–85)

| Test substance            | Risk quotient | scenario   | BBCH       | Honeybee ( <i>Apis mellifera</i> ) |            |            |
|---------------------------|---------------|------------|------------|------------------------------------|------------|------------|
|                           |               |            |            | HQ / ETR                           | trigger    |            |
| Phosmet<br>(Imidan 50 WP) | [REDACTED]    | [REDACTED] | [REDACTED] | [REDACTED]                         | [REDACTED] |            |
|                           |               | [REDACTED] | [REDACTED] | [REDACTED]                         | [REDACTED] |            |
|                           |               | [REDACTED] | [REDACTED] | [REDACTED]                         | [REDACTED] |            |
|                           | [REDACTED]    | [REDACTED] | [REDACTED] | [REDACTED]                         | [REDACTED] | [REDACTED] |
|                           |               | [REDACTED] | [REDACTED] | [REDACTED]                         | [REDACTED] | [REDACTED] |
|                           |               | [REDACTED] | [REDACTED] | [REDACTED]                         | [REDACTED] | [REDACTED] |
|                           |               | [REDACTED] | [REDACTED] | [REDACTED]                         | [REDACTED] | [REDACTED] |
|                           |               | [REDACTED] | [REDACTED] | [REDACTED]                         | [REDACTED] | [REDACTED] |
|                           | [REDACTED]    | [REDACTED] | [REDACTED] | [REDACTED]                         | [REDACTED] | [REDACTED] |
|                           |               | [REDACTED] | [REDACTED] | [REDACTED]                         | [REDACTED] | [REDACTED] |
|                           |               | [REDACTED] | [REDACTED] | [REDACTED]                         | [REDACTED] | [REDACTED] |
|                           |               | [REDACTED] | [REDACTED] | [REDACTED]                         | [REDACTED] | [REDACTED] |
|                           |               | [REDACTED] | [REDACTED] | [REDACTED]                         | [REDACTED] | [REDACTED] |
|                           | [REDACTED]    | [REDACTED] | [REDACTED] | [REDACTED]                         | [REDACTED] | [REDACTED] |
|                           |               | [REDACTED] | [REDACTED] | [REDACTED]                         | [REDACTED] | [REDACTED] |
|                           |               | [REDACTED] | [REDACTED] | [REDACTED]                         | [REDACTED] | [REDACTED] |
| [REDACTED]                |               | [REDACTED] | [REDACTED] | [REDACTED]                         | [REDACTED] |            |

## Surface water

|         | water consumption (µL) | ETR        | Trigger    |
|---------|------------------------|------------|------------|
| acute   | 11.4                   | [REDACTED] | [REDACTED] |
| chronic | 11.4                   | [REDACTED] | [REDACTED] |
| larvae  | 111                    | [REDACTED] | [REDACTED] |

Puddle water: [REDACTED]

## Potatoes (EU Central –Field–) at 1 x 500 g a.s./ha (BBCH 40-49)

| Test substance            | Risk quotient | scenario   | BBCH       | Honeybee ( <i>Apis mellifera</i> ) |            |            |
|---------------------------|---------------|------------|------------|------------------------------------|------------|------------|
|                           |               |            |            | HQ / ETR                           | trigger    |            |
| Phosmet<br>(Imidan 50 WP) | [REDACTED]    | [REDACTED] | [REDACTED] | [REDACTED]                         | [REDACTED] |            |
|                           |               | [REDACTED] | [REDACTED] | [REDACTED]                         | [REDACTED] |            |
|                           |               | [REDACTED] | [REDACTED] | [REDACTED]                         | [REDACTED] |            |
|                           | [REDACTED]    | [REDACTED] | [REDACTED] | [REDACTED]                         | [REDACTED] | [REDACTED] |
|                           |               | [REDACTED] | [REDACTED] | [REDACTED]                         | [REDACTED] | [REDACTED] |
|                           |               | [REDACTED] | [REDACTED] | [REDACTED]                         | [REDACTED] | [REDACTED] |
|                           |               | [REDACTED] | [REDACTED] | [REDACTED]                         | [REDACTED] | [REDACTED] |
|                           |               | [REDACTED] | [REDACTED] | [REDACTED]                         | [REDACTED] | [REDACTED] |
|                           | [REDACTED]    | [REDACTED] | [REDACTED] | [REDACTED]                         | [REDACTED] | [REDACTED] |
|                           |               | [REDACTED] | [REDACTED] | [REDACTED]                         | [REDACTED] | [REDACTED] |
|                           |               | [REDACTED] | [REDACTED] | [REDACTED]                         | [REDACTED] | [REDACTED] |
|                           |               | [REDACTED] | [REDACTED] | [REDACTED]                         | [REDACTED] | [REDACTED] |
|                           |               | [REDACTED] | [REDACTED] | [REDACTED]                         | [REDACTED] | [REDACTED] |
|                           | [REDACTED]    | [REDACTED] | [REDACTED] | [REDACTED]                         | [REDACTED] | [REDACTED] |
|                           |               | [REDACTED] | [REDACTED] | [REDACTED]                         | [REDACTED] | [REDACTED] |
|                           |               | [REDACTED] | [REDACTED] | [REDACTED]                         | [REDACTED] | [REDACTED] |
| [REDACTED]                |               | [REDACTED] | [REDACTED] | [REDACTED]                         | [REDACTED] |            |

## Surface water

|         | water consumption (µL) | ETR | Trigger |
|---------|------------------------|-----|---------|
| acute   | 11.4                   | ■   | ■       |
| chronic | 11.4                   | ■   | ■       |
| larvae  | 111                    | ■   | ■       |

Puddle water: ■

**First tier for guttation** (independent of the crop and application rate and considering that that the water solubility value of phosmet at 20 °C is 15.2 mg/L)

|         | Water cons. (µL) | ETR | trigger |
|---------|------------------|-----|---------|
| acute   | 11.4             | ■   | ■       |
| chronic | 11.4             | ■   | ■       |
| larvae  | 111              | ■   | ■       |
| HPG     | 11.4             | ■   | ■       |

**Effects on other arthropod species (Regulation (EU) N° 283/2013, Annex Part A, point 8.3.2 and Regulation (EU) N° 284/2013 Annex Part A, point 10.3.2)**

**Laboratory tests with standard sensitive species**

| Species                                                   | Test Substance                                                 | End point                          | Toxicity              |
|-----------------------------------------------------------|----------------------------------------------------------------|------------------------------------|-----------------------|
| <i>Typhlodromus pyri</i><br>(Acari: Phytoseiidae)         | WP Formulation containing 500 g/kg Phosmet (48.5 % w/w purity) | Mortality, LR <sub>50</sub> (7 d)  | <b>301 g a.s./ha</b>  |
| <i>Aphidius rhopalosiphi</i><br>(Hymenoptera: Braconidae) | WP Formulation containing 500 g/kg Phosmet (48.5% w/w purity)  | Mortality, LR <sub>50</sub> (48 h) | <b>1.95 g a.s./ha</b> |
| Additional species                                        |                                                                |                                    |                       |
| -                                                         |                                                                |                                    |                       |
| -                                                         |                                                                |                                    |                       |

**First tier risk assessment for:**

**Citrus fruits (EU South –Field–) at 1x 500 g a.s./ha (BBCH 79-89)**

| Test substance                                          | Species                      | Effect (LR <sub>50</sub> g/ha) | HQ in-field   | Growth stage | HQ off-field <sup>1</sup> | Trigger |
|---------------------------------------------------------|------------------------------|--------------------------------|---------------|--------------|---------------------------|---------|
| WP Formulation containing 500 g/kg Phosmet (48.5 % w/w) | <i>Typhlodromus pyri</i>     | 301 g a.s./ha                  | 1.66          | Late         | 0.26                      | 2       |
| WP Formulation containing 500 g/kg Phosmet (48.5 % w/w) | <i>Aphidius rhopalosiphi</i> | 1.95 g a.s./ha                 | <b>256.41</b> | Late         | <b>40.33</b>              |         |

<sup>1</sup> In accordance with Appendix VI of ESCORT II, the distance assumed to calculate the drift rate is 3 m for late applications.

**Pome fruits (EU South –Field–) at 2x 750 g a.s./ha (Effective rate = 847.5 g a.s./ha) (BBCH 67-85)**

| Test substance                                          | Species                      | Effect (LR <sub>50</sub> g/ha) | HQ in-field <sup>2</sup> | Growth stage | HQ off-field <sup>1,2</sup> | Trigger |
|---------------------------------------------------------|------------------------------|--------------------------------|--------------------------|--------------|-----------------------------|---------|
| WP Formulation containing 500 g/kg Phosmet (48.5 % w/w) | <i>Typhlodromus pyri</i>     | 301 g a.s./ha                  | <b>2.82</b>              | Early        | 0.72                        | 2       |
| WP Formulation containing 500 g/kg Phosmet (48.5 % w/w) | <i>Typhlodromus pyri</i>     | 301 g a.s./ha                  | <b>2.82</b>              | Late         | 0.34                        |         |
| WP Formulation containing 500 g/kg Phosmet (48.5 % w/w) | <i>Aphidius rhopalosiphi</i> | 1.95 g a.s./ha                 | <b>434.62</b>            | Early        | <b>110.96</b>               |         |
| WP Formulation containing 500 g/kg Phosmet (48.5 % w/w) | <i>Aphidius rhopalosiphi</i> | 1.95 g a.s./ha                 | <b>434.62</b>            | Late         | <b>57.72</b>                |         |

<sup>1</sup> In accordance with Appendix VI of ESCORT II, the distance assumed to calculate the drift rate is 3 m for early and late applications.

<sup>2</sup> After applying the formula given in the Guidance Document for the risk assessment for Birds and Mammals (EFSA, 2009) and considering a DT<sub>50</sub> of 6.9 days, the MAF value is 1.13.

**Pome fruits (EU Central –Field–) at 2x 500 g a.s./ha (Effective rate = 565 g a.s./ha) (BBCH 67-85)**

| Test substance                                          | Species                      | Effect (LR <sub>50</sub> g/ha) | HQ in-field <sup>2</sup> | Growth stage | HQ off-field <sup>1,2</sup> | Trigger |
|---------------------------------------------------------|------------------------------|--------------------------------|--------------------------|--------------|-----------------------------|---------|
| WP Formulation containing 500 g/kg Phosmet (48.5 % w/w) | <i>Typhlodromus pyri</i>     | 301 g a.s./ha                  | 1.88                     | Early        | 0.48                        | 2       |
| WP Formulation containing 500 g/kg Phosmet (48.5 % w/w) | <i>Typhlodromus pyri</i>     | 301 g a.s./ha                  | 1.88                     | Late         | 0.23                        |         |
| WP Formulation containing 500 g/kg Phosmet (48.5 % w/w) | <i>Aphidius rhopalosiphi</i> | 1.95 g a.s./ha                 | <b>289.74</b>            | Early        | <b>73.97</b>                |         |
| WP Formulation containing 500 g/kg Phosmet (48.5 % w/w) | <i>Aphidius rhopalosiphi</i> | 1.95 g a.s./ha                 | <b>289.74</b>            | Late         | <b>35.15</b>                |         |

<sup>1</sup> In accordance with Appendix VI of ESCORT II, the distance assumed to calculate the drift rate is 3 m for early and late applications.

<sup>2</sup> After applying the formula given in the Guidance Document for the risk assessment for Birds and Mammals (EFSA, 2009) and considering a DT<sub>50</sub> of 6.9 days, the MAF value is 1.13.

**Peaches/Nectarines (EU South –Field–) at 2x 700 g a.s./ha (Effective rate = 959 g a.s./ha) (BBCH 71-85)**

| Test substance                                          | Species                  | Effect (LR <sub>50</sub> g/ha) | HQ in-field <sup>2</sup> | Growth stage | HQ off-field <sup>1,2</sup> | Trigger |
|---------------------------------------------------------|--------------------------|--------------------------------|--------------------------|--------------|-----------------------------|---------|
| WP Formulation containing 500 g/kg Phosmet (48.5 % w/w) | <i>Typhlodromus pyri</i> | 301 g a.s./ha                  | <b>3.19</b>              | Early        | 0.81                        | 2       |

| Test substance                                          | Species                      | Effect (LR <sub>50</sub> g/ha) | HQ in-field <sup>2</sup> | Growth stage | HQ off-field <sup>1,2</sup> | Trigger |
|---------------------------------------------------------|------------------------------|--------------------------------|--------------------------|--------------|-----------------------------|---------|
| WP Formulation containing 500 g/kg Phosmet (48.5 % w/w) | <i>Aphidius rhopalosiphi</i> | 1.95 g a.s./ha                 | <b>491.79</b>            | Early        | <b>125.56</b>               |         |
| WP Formulation containing 500 g/kg Phosmet (48.5 % w/w) | <i>Typhlodromus pyri</i>     | 301 g a.s./ha                  | <b>3.19</b>              | Late         | 0.39                        |         |
| WP Formulation containing 500 g/kg Phosmet (48.5 % w/w) | <i>Aphidius rhopalosiphi</i> | 1.95 g a.s./ha                 | <b>491.79</b>            | Late         | <b>59.65</b>                |         |

<sup>1</sup> In accordance with Appendix VI of ESCORT II, the distance assumed to calculate the drift rate is 3 m for late applications.

<sup>2</sup> After applying the formula given in the Guidance Document for the risk assessment for Birds and Mammals (EFSA, 2009) and considering a DT50 of 6.9 days, the MAF value is 1.37.

#### Potatoes (EU Central –Field–) at 1x 500 g a.s./ha (BBCH 40-49)

| Test substance                                          | Species                      | Effect (LR <sub>50</sub> g/ha) | HQ in-field   | Growth stage                   | HQ off-field <sup>1</sup> | Trigger |
|---------------------------------------------------------|------------------------------|--------------------------------|---------------|--------------------------------|---------------------------|---------|
| WP Formulation containing 500 g/kg Phosmet (48.5 % w/w) | <i>Typhlodromus pyri</i>     | 301 g a.s./ha                  | 1.66          | Tuber formation (BBCH 40 - 49) | 0.05                      | 2       |
| WP Formulation containing 500 g/kg Phosmet (48.5 % w/w) | <i>Aphidius rhopalosiphi</i> | 1.95 g a.s./ha                 | <b>256.41</b> | Tuber formation (BBCH 40 - 49) | <b>7.10</b>               |         |

<sup>1</sup> In accordance with Appendix VI of ESCORT II, the distance assumed to calculate the drift rate is 1 m for field crops.

#### Extended laboratory tests, aged residue tests

| Species                                         | Life stage | Test substance, substrate                                                                  | Time scale              | Dose (g a.s./ha) <sup>1,2</sup> | End point                                                 | % effect <sup>3</sup>                                                                                         |
|-------------------------------------------------|------------|--------------------------------------------------------------------------------------------|-------------------------|---------------------------------|-----------------------------------------------------------|---------------------------------------------------------------------------------------------------------------|
| <b>Extended laboratory /Aged residues tests</b> |            |                                                                                            |                         |                                 |                                                           |                                                                                                               |
| <i>Aphidius rhopalosiphi</i> (Hym.: Braconidae) | adults     | WP Formulation containing 500 g/kg Phosmet (48.5 % w/w); initial residues on barley plants | 0 DAT                   | 6.0, 8.11, 11.0, 14.8 and 20.0  | Mortality (48 h);<br>Reproduction (Parasitisation) (24 h) | <b>LR<sub>50</sub> = 10.3 g a.s./ha</b><br><br>Reproduction affected starting at 6 g a.s./ha (37% reduction). |
| <i>Aphidius rhopalosiphi</i> (Hym.: Braconidae) | adults     | WP Formulation containing 500 g/kg Phosmet (48.5 % w/w); initial and aged                  | 0, 7, 14, 21 and 28 DAT | 30, 100, 300 and 500            | Mortality (48 h);<br>Reproduction (Parasitisation) (24 h) | At 500 g a.s./ha, mortality above the ESCORT 2 trigger value of 50% up to 21 DAT and 10% 28 DAT.              |

| Species                                                | Life stage   | Test substance, substrate                                                       | Time scale                       | Dose (g a.s./ha) <sup>1,2</sup> | End point                                                                | % effect <sup>3</sup>                                                                                                                                                                                                                                       |
|--------------------------------------------------------|--------------|---------------------------------------------------------------------------------|----------------------------------|---------------------------------|--------------------------------------------------------------------------|-------------------------------------------------------------------------------------------------------------------------------------------------------------------------------------------------------------------------------------------------------------|
| <b>Extended laboratory /Aged residues tests</b>        |              |                                                                                 |                                  |                                 |                                                                          |                                                                                                                                                                                                                                                             |
|                                                        |              | residues on barley plants                                                       |                                  |                                 |                                                                          | Reproduction affected (47% reduction) at 500 g a.s./ha 28 DAT.                                                                                                                                                                                              |
| <i>Aphidius rhopalosiphi</i><br>(Hym.: Braconidae)     | adults       | Imidan 50 WP (50.15 % Phosmet); initial and aged residues on grape-vine leaves  | 0, 21, 35, 49, 63, 70 and 77 DAT | 825                             | Mortality (48 h);<br>Reproduction (Parasitisation) (24 h)                | At 825 g a.s./ha, the effects on mortality (M = 46.4%) and reproduction (26.9% of increase) were below the ESCORT 2 trigger value of 50 % 63 DAT in the not rain protected group and 70 DAT in the rain protected group (M = 44.8%; R = 34.1% of increase). |
| <i>Aphidius rhopalosiphi</i><br>(Hym.: Braconidae)     | adults       | Imidan 50 WP (50.8 % Phosmet); initial and aged residues on grape-vine branches | 0, 28, 56 and 70 DAT             | 1065                            | Mortality (48 h);<br>Reproduction (Parasitisation) (24 h)                | At the rate of 1065 g a.s./ha, the effects on mortality (M = 33.3%) and reproduction (8.7% of reduction) were below the ESCORT 2 trigger value of 50 % 56 DAT.                                                                                              |
| <i>Typhlodromus pyri</i><br>(Acari: Phytoseiidae)      | proto-nymphs | Imidan 50 WP (50.8 % Phosmet); initial residues on bean leaf discs              | 0 DAT                            | 93.8, 187.5, 375, 750 and 1500  | Mortality (7 d)<br>Reproduction (7 d)                                    | <b>LR<sub>50</sub> &gt; 1500 g a.s./ha</b><br><br>Reproduction not affected up to 1500 g a.s./ha                                                                                                                                                            |
| <i>Chrysoperla carnea</i><br>(Neuroptera: Chrysopidae) | larvae       | WP Formulation containing 500 g/kg Phosmet (48.5 % w/w);                        | 0 DAT                            | 50, 100, 200, 400 and 800       | Mortality (12 – 19 days; until emergence of the adults);<br>Reproduction | <b>LR<sub>50</sub> = 80 g a.s./ha</b><br><br>Reproduction not affected up to 100 g a.s./ha.                                                                                                                                                                 |



| Species                                                   | Life stage | Test substance, substrate                                                                       | Time scale | Dose (g a.s./ha) <sup>1,2</sup> | End point                                        | % effect <sup>3</sup>                                                                         |
|-----------------------------------------------------------|------------|-------------------------------------------------------------------------------------------------|------------|---------------------------------|--------------------------------------------------|-----------------------------------------------------------------------------------------------|
| <b>Extended laboratory /Aged residues tests</b>           |            |                                                                                                 |            |                                 |                                                  |                                                                                               |
|                                                           |            | initial residues on bean leaf discs                                                             |            |                                 | (24 h)                                           |                                                                                               |
| <i>Coccinella septempunctata</i><br>(Col.: Coccinellidae) | larvae     | WP Formulation containing 500 g/kg Phosmet (48.5 % w/w);<br>initial residues on bean leaf discs | 0 DAT      | 0.60, 0.93, 1.45, 2.25 and 3.50 | Mortality (12 – 15 days);<br>Reproduction (24 h) | <b>LR<sub>50</sub> = 2.64 g a.s./ha</b><br><br>Reproduction not affected up to 2.25 g a.s./ha |

<sup>1</sup> indicate whether initial or aged residues

<sup>2</sup> for preparations indicate whether dose is expressed in units of a.s. or preparation

<sup>3</sup> indicate if positive percentages relate to adverse effects or not

#### Risk assessment based on extended laboratory tests (with a correction factor CF = 5) for:

##### Citrus fruits (EU South –Field–) at 1x 500 g a.s./ha (BBCH 79-89)

| Species                          | ER <sub>50</sub> (g/ha) | In-field rate (g/ha) | Off-field rate <sup>1</sup> (g/ha) |
|----------------------------------|-------------------------|----------------------|------------------------------------|
| <i>Typhlodromus pyri</i>         | > 1500                  | 500                  | 39.33                              |
| <i>Aphidius rhopalosiphi</i>     | 10.3                    | <b>500</b>           | <b>393.3</b>                       |
| <i>Chrysoperla carnea</i>        | 80                      | <b>500</b>           | 39.33                              |
| <i>Coccinella septempunctata</i> | 2.64                    | <b>500</b>           | <b>39.33</b>                       |

<sup>1</sup> In accordance with ESCORT II, the distance assumed to calculate the off-field rate is 3 m (fruit crops). VDF = 10 for *T. pyri*, *C. carnea* and *C. septempunctata*; VDF = 1 for *A. rhopalosiphi*.

##### Pome fruits (EU South –Field–) at 2x 750 g a.s./ha (Effective rate = 847.5 g a.s./ha) (BBCH 67-85)

| Species                          | ER <sub>50</sub> (g/ha) | In-field rate <sup>2</sup> (g/ha) | Off-field rate <sup>1,2,3</sup> (g/ha) |
|----------------------------------|-------------------------|-----------------------------------|----------------------------------------|
| <i>Typhlodromus pyri</i>         | > 1500                  | 847.5                             | 108.18 / 51.40                         |
| <i>Aphidius rhopalosiphi</i>     | 10.3                    | <b>847.5</b>                      | <b>1081.83 / 514.01</b>                |
| <i>Chrysoperla carnea</i>        | 80                      | <b>847.5</b>                      | <b>108.18 / 51.40</b>                  |
| <i>Coccinella septempunctata</i> | 2.64                    | <b>847.5</b>                      | <b>108.18 / 51.40</b>                  |

<sup>1</sup> In accordance with ESCORT II, the distance assumed to calculate the off-field rate is 3 m (fruit crops). VDF = 10 for *T. pyri*, *C. carnea* and *C. septempunctata*; VDF = 1 for *A. rhopalosiphi*.

<sup>2</sup> After applying the formula given in the Guidance Document for the risk assessment for Birds and Mammals (EFSA, 2009) and considering a DT50 of 6.9 days, the MAF value is 1.13.

<sup>3</sup> According to the GAP Table, for pome fruits (BBCH 67-85), it cannot be ensured that the applications are performed in the “late” stage and therefore, according to the precautionary principle, the risk assessment should also contemplate the early application option (early / late).

##### Pome fruits (EU Central –Field–) at 2x 500 g a.s./ha (Effective rate = 565 g a.s./ha) (BBCH 67-85)

| Species                      | ER <sub>50</sub> (g/ha) | In-field rate <sup>2</sup> (g/ha) | Off-field rate <sup>1,2,3</sup> (g/ha) |
|------------------------------|-------------------------|-----------------------------------|----------------------------------------|
| <i>Typhlodromus pyri</i>     | > 1500                  | 565                               | 72.12 / 34.27                          |
| <i>Aphidius rhopalosiphi</i> | 10.3                    | <b>565</b>                        | <b>721.22 / 342.7</b>                  |
| <i>Chrysoperla carnea</i>    | 80                      | <b>565</b>                        | 72.12 / 34.27                          |

| Species                          | ER <sub>50</sub> (g/ha) | In-field rate <sup>2</sup> (g/ha) | Off-field rate <sup>1,2,3</sup> (g/ha) |
|----------------------------------|-------------------------|-----------------------------------|----------------------------------------|
| <i>Coccinella septempunctata</i> | 2.64                    | <b>565</b>                        | <b>72.12 / 34.27</b>                   |

<sup>1</sup> In accordance with ESCORT II, the distance assumed to calculate the off-field rate is 3 m (fruit crops). VDF = 10 for *T. pyri*, *C. carnea* and *C. septempunctata*; VDF = 1 for *A. rhopalosiphi*.

<sup>2</sup> After applying the formula given in the Guidance Document for the risk assessment for Birds and Mammals (EFSA, 2009) and considering a DT50 of 6.9 days, the MAF value is 1.13.

<sup>3</sup> According to the GAP Table, for pome fruits (BBCH 67-85), it cannot be ensured that the applications are performed in the “late” stage and therefore, according to the precautionary principle, the risk assessment should also contemplate the early application option (early / late).

#### Peaches/Nectarines (EU South –Field–) at 2x 700 g a.s./ha (Effective rate = 959 g a.s./ha) (BBCH 71-85)

| Species                          | ER <sub>50</sub> (g/ha) | In-field rate <sup>2</sup> (g/ha) | Off-field rate <sup>1,2</sup> (g/ha) |
|----------------------------------|-------------------------|-----------------------------------|--------------------------------------|
| <i>Typhlodromus pyri</i>         | > 1500                  | 959                               | 122.42                               |
| <i>Aphidius rhopalosiphi</i>     | 10.3                    | <b>959</b>                        | <b>1224.2</b>                        |
| <i>Chrysoperla carnea</i>        | 80                      | <b>959</b>                        | <b>122.42</b>                        |
| <i>Coccinella septempunctata</i> | 2.64                    | <b>959</b>                        | <b>1224.2</b>                        |

<sup>1</sup> In accordance with ESCORT II, the distance assumed to calculate the off-field rate is 3 m (fruit crops). VDF = 10 for *T. pyri*, *C. carnea* and *C. septempunctata*; VDF = 1 for *A. rhopalosiphi*.

<sup>2</sup> After applying the formula given in the Guidance Document for the risk assessment for Birds and Mammals (EFSA, 2009) and considering a DT50 of 6.9 days, the MAF value is 1.37.

<sup>3</sup> According to the GAP Table, for peaches/nectarines (BBCH 71-85), it cannot be ensured that the applications are performed in the “late” stage and therefore, according to the precautionary principle, the risk assessment should also contemplate the early application option (early / late).

#### Potatoes (EU Central –Field–) at 1x 500 g a.s./ha (BBCH 40-49)

| Species                          | ER <sub>50</sub> (g/ha) | In-field rate (g/ha) | Off-field rate <sup>1</sup> (g/ha) |
|----------------------------------|-------------------------|----------------------|------------------------------------|
| <i>Typhlodromus pyri</i>         | > 1500                  | 500                  | 6.925                              |
| <i>Aphidius rhopalosiphi</i>     | 10.3                    | <b>500</b>           | <b>69.25</b>                       |
| <i>Chrysoperla carnea</i>        | 80                      | <b>500</b>           | 6.925                              |
| <i>Coccinella septempunctata</i> | 2.64                    | <b>500</b>           | <b>6.925</b>                       |

<sup>1</sup> In accordance with ESCORT II, the distance assumed to calculate the off-field rate is 1 m (field crops). VDF = 10 for *T. pyri*, *C. carnea* and *C. septempunctata*; VDF = 1 for *A. rhopalosiphi*.

|                                                                                                                                                                                                                                                                                                                                                                                                                                                                                                                                                                                                                                                                                                                                                                                                                                                                                                                                                                                                                                                                                                                                                                                                                                                                                                                                                                                                                                                                                                                                                                                                        |
|--------------------------------------------------------------------------------------------------------------------------------------------------------------------------------------------------------------------------------------------------------------------------------------------------------------------------------------------------------------------------------------------------------------------------------------------------------------------------------------------------------------------------------------------------------------------------------------------------------------------------------------------------------------------------------------------------------------------------------------------------------------------------------------------------------------------------------------------------------------------------------------------------------------------------------------------------------------------------------------------------------------------------------------------------------------------------------------------------------------------------------------------------------------------------------------------------------------------------------------------------------------------------------------------------------------------------------------------------------------------------------------------------------------------------------------------------------------------------------------------------------------------------------------------------------------------------------------------------------|
| Semi-field tests                                                                                                                                                                                                                                                                                                                                                                                                                                                                                                                                                                                                                                                                                                                                                                                                                                                                                                                                                                                                                                                                                                                                                                                                                                                                                                                                                                                                                                                                                                                                                                                       |
| -                                                                                                                                                                                                                                                                                                                                                                                                                                                                                                                                                                                                                                                                                                                                                                                                                                                                                                                                                                                                                                                                                                                                                                                                                                                                                                                                                                                                                                                                                                                                                                                                      |
| Field studies                                                                                                                                                                                                                                                                                                                                                                                                                                                                                                                                                                                                                                                                                                                                                                                                                                                                                                                                                                                                                                                                                                                                                                                                                                                                                                                                                                                                                                                                                                                                                                                          |
| <p><b>The available aged residue trials are [REDACTED] to conclude on the potential for recovery/recolonisation for the most vulnerable NTAs identified via the extended laboratory tests. [REDACTED]</b></p> <p>[REDACTED]</p> <p>Four NTAs field studies were available to assess the off-field effects on arthropod populations and community after different scenarios of phosmet applications. Two of these studies were actually performed in field crops and were therefore considered not representative for off-field environments. A summary is reported below:</p> <p><u>Italy: NTAs full arthropod fauna off-field study in alfalfa (B.9.5.2.4/02).</u><br/> <b>Significant and long-lasting effects of Phosmet on Coccinellidae populations</b> at the drift rates of 2 x 21.5 g a.s./ha and 2 x 63.5 g a.s./ha were detected.<br/>         A minor and short-term impact on the evaluated ground and plant living arthropod communities were recorded. A NOER of 14.5 g a.s./ha was derived from this study, but cannot be considered reliable considering the shortcomings of the study, especially taking into consideration that the first sampling was 6/7 days after each application. Therefore, it is not possible to conclude on the absence of immediate effects after application.</p> <p><u>Germany: NTAs full arthropod fauna off-field study in winter wheat (B.9.5.2.4/03).</u><br/> <b>Significant and long-lasting effects of Phosmet on Linyphiidae spiders' populations</b> at the drift rate of 2 x 21.5 g a.s./ha were detected. Coccinellidae were not present.</p> |

A minor and short-term impact on the evaluated ground and plant living arthropod communities were recorded. A NOER of 14.5 g a.s./ha was derived from this study, but cannot be considered reliable considering the shortcomings of the study, especially taking into consideration that the first sampling was 6/7 days after each application. Therefore, it is not possible to conclude on the absence of immediate effects after application.

**Overall, the experts considered these two studies not useful to address the risk in the off-field.**

SW France: NTAs full arthropod fauna off-field study in **uncultivated grassland area** (B.9.5.2.4/04).

**Class 3 effects in other Carabidae at 10 g a.s./ha** were detected. Other minor population effects were also detected for other taxa as for example the adults' populations of the Linyphiidae spider *Oedothorax apicatus* at 5 g a.s./ha, the Aphidoidea populations at 10 g a.s./ha or the adult Miridae at 5 and 10 g a.s./ha, but no effects are however detected for these groups at higher rates.

Only a minor and short-term impact on the evaluated ground and plant living arthropod communities (e.g. sweepnet dataset at 10 g a.s./ha) was detected.

**NOER = 5 g a.s./ha. Overall, the NOER of 5 g a.s./ha is agreed for this study.**

Germany: NTAs full arthropod fauna off-field study in **uncultivated grassland area** (B.9.5.2.4/05).

**Class 3 effects were recorded in one taxon (Collembola, Symphypleona) at 16 g a.s./ha**, with a significant population reduction compared to the control immediately after the treatment that lasted until the 4th week.

Effects on this taxon were however seen at all concentration levels.

Other population effects are also detected for other taxa as for example the juveniles' populations of the Tetragnathidae spider *Pachygnata degeeri* at all concentrations. Coccinellidae were not detected in sufficient number for analysis in this study.

**Overall, no NOER value can be derived from this study, since effects are seen at the lowest application rate tested of 5 g a.s./ha.**

**An overall higher tier NOER that can be used for the off-field risk assessment is not available.**

Additional specific test

-

**Effects on non-target soil meso- and macro fauna; effects on soil nitrogen transformation (Regulation (EU) N° 283/2013, Annex Part A, points 8.4, 8.5, and Regulation (EU) N° 284/2013 Annex Part A, points 10.4, 10.5)**

| Test organism                 | Test substance <sup>1</sup>                             | Time scale            | End point <sup>2</sup>                                                                                                                                                                                                                                                                                                                                                                                                                                                                       |
|-------------------------------|---------------------------------------------------------|-----------------------|----------------------------------------------------------------------------------------------------------------------------------------------------------------------------------------------------------------------------------------------------------------------------------------------------------------------------------------------------------------------------------------------------------------------------------------------------------------------------------------------|
| <b>Earthworms</b>             |                                                         |                       |                                                                                                                                                                                                                                                                                                                                                                                                                                                                                              |
| <i>Eisenia foetida andrei</i> | Phosmet technical (96.5%); incorporated in soil, 10% OM | Chronic<br>28-d; 56-d | 28-d NOEC mortality $\geq$ 12.24 mg phosmet/kg soil<br>56-d EC10 reproduction = 5.91 mg phosmet/kg soil (4.51 – 7.73)<br>56-d EC20 reproduction = 7.45 mg phosmet/kg soil (6.19 – 8.96)<br>56-d EC50 reproduction = 11.6 mg phosmet/kg soil (10.2 – 13.2)<br>56-d NOEC reproduction = 6.8 mg phosmet/kg soil<br><b><i>E. foetida andrei</i> 56-d Endpoint reproduction = 5.91 mg phosmet/kg soil</b><br><br><b>*Corrected (log Pow &gt; 2):<br/>Endpoint corr = 2.955 mg phosmet/kg soil</b> |

| Test organism                     | Test substance <sup>1</sup>                                                                                                                       | Time scale         | End point <sup>2</sup>                                                                                                                                                                                                                                                                                                                                                                                                                                                         |
|-----------------------------------|---------------------------------------------------------------------------------------------------------------------------------------------------|--------------------|--------------------------------------------------------------------------------------------------------------------------------------------------------------------------------------------------------------------------------------------------------------------------------------------------------------------------------------------------------------------------------------------------------------------------------------------------------------------------------|
| <b>Other soil macro-organisms</b> |                                                                                                                                                   |                    |                                                                                                                                                                                                                                                                                                                                                                                                                                                                                |
| <i>Folsomia candida</i>           | Phosmet technical (96.5%); incorporated in soil, 5% OM                                                                                            | Chronic 28-d       | 28-d LC50 mortality = 5.28 mg a.s./kg soil<br>28-d EC10 reproduction = 2.34 mg phosmet/kg soil (1.43 – 3.83)<br>28-d EC20 reproduction = 3.29 mg phosmet/kg soil (2.27 – 4.75)<br>28-d EC50 reproduction = 6.28 mg phosmet/kg soil (4.96 – 7.97)<br><b><i>F. candida</i> 28-d NOEC reproduction = 1.62 mg phosmet/kg soil</b><br><br><b>*Corrected (log Pow &gt; 2):<br/>NOECcorr = 0.81 mg phosmet/kg soil</b>                                                                |
| <i>Hypoaspis aculeifer</i>        | Phosmet technical (96.5%); incorporated in soil, 5% OM                                                                                            | Chronic 14-d       | 14-d LC50 mortality = 42.8 mg a.s./kg soil<br>14-d EC10 reproduction = 28.2 mg phosmet/kg soil (22.4 – 35.4)<br>14-d EC20 reproduction = 32.3 mg phosmet/kg soil (26.5 – 39.2)<br>14-d EC50 reproduction = 41.8 mg phosmet/kg soil (35.1 – 49.7)<br>14-d NOEC reproduction = 30.9 mg phosmet/kg soil<br><b><i>H. aculeifer</i> 14-d Endpoint reproduction = 28.2 mg phosmet/kg soil</b><br><br><b>*Corrected (log Pow &gt; 2):<br/>Endpoint corr = 14.1 mg phosmet/kg soil</b> |
| Collembolan populations           | WP Formulation containing 500 g/kg Phosmet, Imidan 50 WP; two applications of 1.0 kg formulation/ha and two applications of 1.5 kg formulation/ha | 1 year field study | The results of the study did not clearly demonstrate recovery of several species of collembolas within one year after treatment (See Study 9.7.2.2/01 for further details).                                                                                                                                                                                                                                                                                                    |

<sup>1</sup>To indicate whether the test substance was over sprayed/to indicate the organic content of the test soil (e.g. 5 % or 10 %).

<sup>2</sup>corrected due to log Pow > 2.0 (e.g. NOECcorr)

|                         |                          |  |                                                       |
|-------------------------|--------------------------|--|-------------------------------------------------------|
| Nitrogen transformation | Preparation: 500 g/kg WP |  | < 25 % effect at day 28 at 3.3875 mg a.s./kg d.w.soil |
|-------------------------|--------------------------|--|-------------------------------------------------------|

## Toxicity/exposure ratios for soil organisms

### Formulated product: WP formulation containing 500g/kg Phosmet

#### Earthworms

#### **Citrus fruits (EU South –Field–) at 1x 500 g a.s./ha**

| Test organism                 | Test substance | Time scale | Soil PEC | TER  | Trigger |
|-------------------------------|----------------|------------|----------|------|---------|
| <i>Eisenia foetida andrei</i> | Phosmet        | Chronic    | 0.133    | 22.2 | 5       |

**Pome fruits early app. (EU South –Field–) at 2x 750 g a.s./ha**

| Test organism                 | Test substance | Time scale | Soil PEC | TER  | Trigger |
|-------------------------------|----------------|------------|----------|------|---------|
| <i>Eisenia foetida andrei</i> | Phosmet        | Chronic    | 0.400    | 7.39 | 5       |

**Pome fruits late app. (EU South –Field–) at 2x 750 g a.s./ha**

| Test organism                 | Test substance | Time scale | Soil PEC | TER  | Trigger |
|-------------------------------|----------------|------------|----------|------|---------|
| <i>Eisenia foetida andrei</i> | Phosmet        | Chronic    | 0.3913   | 7.55 | 5       |

**Pome fruits early app. (EU Central –Field–) at 2x 500 g a.s./ha**

| Test organism                 | Test substance | Time scale | Soil PEC | TER   | Trigger |
|-------------------------------|----------------|------------|----------|-------|---------|
| <i>Eisenia foetida andrei</i> | Phosmet        | Chronic    | 0.2667   | 11.08 | 5       |

**Pome fruits late app. (EU Central –Field–) at 2x 500 g a.s./ha**

| Test organism                 | Test substance | Time scale | Soil PEC | TER   | Trigger |
|-------------------------------|----------------|------------|----------|-------|---------|
| <i>Eisenia foetida andrei</i> | Phosmet        | Chronic    | 0.2608   | 11.33 | 5       |

**Peaches/Nectarines (EU South –Field–) at 2x 700 g a.s./ha**

| Test organism                 | Test substance | Time scale | Soil PEC | TER  | Trigger |
|-------------------------------|----------------|------------|----------|------|---------|
| <i>Eisenia foetida andrei</i> | Phosmet        | Chronic    | 0.4149   | 7.12 | 5       |

**Potatoes (EU Central –Field–) at 1x 500 g a.s./ha**

| Test organism                 | Test substance | Time scale | Soil PEC | TER   | Trigger |
|-------------------------------|----------------|------------|----------|-------|---------|
| <i>Eisenia foetida andrei</i> | Phosmet        | Chronic    | 0.100    | 29.55 | 5       |

**Other soil meso- and macrofauna****Citrus fruits (EU South –Field–) at 1x 500 g a.s./ha**

| Test organism              | Test substance | Time scale | Soil PEC | TER  | Trigger |
|----------------------------|----------------|------------|----------|------|---------|
| <i>Folsomia candida</i>    | Phosmet        | Chronic    | 0.133    | 6.09 | 5       |
| <i>Hypoaspis aculeifer</i> | Phosmet        | Chronic    | 0.133    | 106  | 5       |

**Pome fruits early app. (EU South –Field–) at 2x 750 g a.s./ha**

| Test organism              | Test substance | Time scale | Soil PEC | TER         | Trigger |
|----------------------------|----------------|------------|----------|-------------|---------|
| <i>Folsomia candida</i>    | Phosmet        | Chronic    | 0.400    | <b>2.03</b> | 5       |
| <i>Hypoaspis aculeifer</i> | Phosmet        | Chronic    | 0.400    | 35.25       | 5       |

**Pome fruits late app. (EU South –Field–) at 2x 750 g a.s./ha**

| Test organism              | Test substance | Time scale | Soil PEC | TER         | Trigger |
|----------------------------|----------------|------------|----------|-------------|---------|
| <i>Folsomia candida</i>    | Phosmet        | Chronic    | 0.3913   | <b>2.06</b> | 5       |
| <i>Hypoaspis aculeifer</i> | Phosmet        | Chronic    | 0.3913   | 35.88       | 5       |

**Pome fruits early app. (EU Central –Field–) at 2x 500 g a.s./ha**

| Test organism              | Test substance | Time scale | Soil PEC | TER         | Trigger |
|----------------------------|----------------|------------|----------|-------------|---------|
| <i>Folsomia candida</i>    | Phosmet        | Chronic    | 0.2667   | <b>3.04</b> | 5       |
| <i>Hypoaspis aculeifer</i> | Phosmet        | Chronic    | 0.2667   | 52.87       | 5       |

**Pome fruits late app. (EU Central –Field–) at 2x 500 g a.s./ha**

| Test organism              | Test substance | Time scale | Soil PEC | TER         | Trigger |
|----------------------------|----------------|------------|----------|-------------|---------|
| <i>Folsomia candida</i>    | Phosmet        | Chronic    | 0.2608   | <b>3.11</b> | 5       |
| <i>Hypoaspis aculeifer</i> | Phosmet        | Chronic    | 0.2608   | 54.06       | 5       |

**Peaches/Nectarines (EU South –Field–) at 2x 700 g a.s./ha**

| Test organism              | Test substance | Time scale | Soil PEC | TER         | Trigger |
|----------------------------|----------------|------------|----------|-------------|---------|
| <i>Folsomia candida</i>    | Phosmet        | Chronic    | 0.4149   | <b>1.95</b> | 5       |
| <i>Hypoaspis aculeifer</i> | Phosmet        | Chronic    | 0.4149   | 33.98       | 5       |

**Potatoes (EU Central –Field–) at 1x 500 g a.s./ha**

| Test organism              | Test substance | Time scale | Soil PEC | TER   | Trigger |
|----------------------------|----------------|------------|----------|-------|---------|
| <i>Folsomia candida</i>    | Phosmet        | Chronic    | 0.100    | 8.10  | 5       |
| <i>Hypoaspis aculeifer</i> | Phosmet        | Chronic    | 0.100    | 141.0 | 5       |

### Effects on terrestrial non target higher plants (Regulation (EU) N° 283/2013, Annex Part A, point 8.6 and Regulation (EU) N° 284/2013 Annex Part A, point 10.6)

#### Screening data

No data submitted.

#### Risk assessment based on laboratory dose response tests

| Crop                     | AR [g a.s./ha] | Risk mitigation    | Drift value [%] | Drift rate (Deposition after volatilisation) [g a.s./ha]** | Total amount of Phosmet reaching the off-field [g a.s./ha] | Lowest ER <sub>50</sub> [g a.s./ha] | TER  | Trigger |
|--------------------------|----------------|--------------------|-----------------|------------------------------------------------------------|------------------------------------------------------------|-------------------------------------|------|---------|
| <b>Vegetative vigour</b> |                |                    |                 |                                                            |                                                            |                                     |      |         |
| Orchards (Worst-Case)    | 750            | 3 m spray distance | Early: 29.20    | 219.0 (0.755)                                              | 219.8                                                      | 3800                                | 17.3 | 5       |
|                          |                |                    | Late: 15.73     | 117.95 (0.768)                                             | 118.7                                                      |                                     | 32.0 |         |
| Potatoes                 | 500            | none               | 2.77            | 13.85 (0.377)                                              | 14.23                                                      | 3800                                | 267  | 5       |

Values in **bold** are below the relevant trigger of 5, indicating high risk

\*\* Deposition after volatilisation of Phosmet is given in brackets. Due to the vapour pressure of  $3.38 \times 10^{-5}$  Pascal for Phosmet which is above the trigger of  $1 \times 10^{-5}$  Pascal, the deposition of Phosmet after volatilisation (sum over 24 h) is added to the drift rate when calculating the HQ for the off-field. No buffer zones assumed. In line with ESCORT 2, deposition values at a distance of 3 m for orchard uses and of 1 m for potatoes are used (for details, please refer to Vol 3CP B.8).

Extended laboratory studies: No data submitted.

Semi-field and field test: No data submitted.

### Effects on biological methods for sewage treatment (Regulation (EU) N° 283/2013, Annex Part A, point 8.8)

| Test type/organism    | end point                                                                  |
|-----------------------|----------------------------------------------------------------------------|
| Activated sludge      | Phosmet exhibited no acute toxic effects to activated sludge at 1000 mg/L. |
| <i>Pseudomonas sp</i> | -                                                                          |

### Monitoring data (Regulation (EU) N° 283/2013, Annex Part A, point 8.9 and Regulation (EU) N° 284/2013, Annex Part A, point 10.8)

Available monitoring data concerning adverse effect of the a.s. No data available.

Available monitoring data concerning effect of the PPP. No data available.

**Definition of the residue for monitoring (Regulation (EU) N° 283/2013, Annex Part A, point 7.4.2). Ecotoxicologically relevant compounds<sup>1</sup>**

|             |              |
|-------------|--------------|
| Compartment |              |
| soil        | Phosmet      |
| water       | Phosmet      |
| sediment    | Not required |
| groundwater | Phosmet      |

<sup>1</sup> metabolites are considered relevant when, based on the risk assessment, they pose a risk comparable or higher than the parent

**Classification and labelling with regard to ecotoxicological data (Regulation (EU) N° 283/2013, Annex Part A, Section 10)**

Substance

Harmonised classification according to Regulation (EC) No 1272/2008 and its Adaptations to Technical Process [Table 3.1 of Annex VI of Regulation (EC) No 1272/2008 as amended]<sup>5</sup>:

According to the Peer review, the criteria for classification may be met for:

|                                                  |
|--------------------------------------------------|
| Phosmet                                          |
| Aquatic Acute 1 - H400, Aquatic Chronic 1 - H410 |
| Acute Cat. 1 M 100<br>Chronic Cat. 1 M 100       |

<sup>5</sup> Regulation (EC) No 1272/2008 of the European Parliament and of the Council of 16 December 2008 on classification, labelling and packaging of substances and mixtures, amending and repealing Directives 67/548/EEC and 1999/45/EC, and amending Regulation (EC) No 1907/2006. OJ L 353, 31.12.2008, 1-1355.
